# Supplementary material
Source: publisher site journal article supplement (https://www.spandidos-publications.com/7465/downloadSupplementary)
Supplement: Supplementary file 1 [file downloadSupplementary]

## Sheet: GSE3438
Table SVI. Differentially expressed genes between the gastric cancer and normal tissues from GSE3438 cohort.
Genes	logFC	t	P.Value	adj.P.Val	B	Changea
DGKD	1.21931	16.5791	1.11755e-30	4.87365e-27	59.2647	Up-regulated
RNASE1	2.23644	15.5988	9.73276e-29	2.02198e-25	54.8623	Up-regulated
ATP4B	5.67409	15.5215	1.39095e-28	2.02198e-25	54.5102	Up-regulated
CTSB	-1.56518	-15.2809	4.24974e-28	4.2845e-25	53.4085	Down-regulated
CPA3	4.21091	15.2498	4.9123e-28	4.2845e-25	53.2655	Up-regulated
ARPC1B	-1.12829	-15.1468	7.94706e-28	5.77619e-25	52.7909	Down-regulated
RHBDD1	4.21844	14.8396	3.35864e-27	1.89588e-24	51.3685	Up-regulated
APOB	2.33423	14.8322	3.47788e-27	1.89588e-24	51.334	Up-regulated
PRKD3	2.96759	14.6268	9.17567e-27	4.44612e-24	50.3763	Up-regulated
TIMP1	-2.60168	-14.5763	1.16555e-26	5.08296e-24	50.1401	Down-regulated
TMEM237	-1.69832	-14.4271	2.36755e-26	9.38626e-24	49.4404	Down-regulated
DHRS7	1.06513	14.4061	2.61759e-26	9.51275e-24	49.3413	Up-regulated
KMT2C	-1.26074	-14.3242	3.86689e-26	1.29719e-23	48.9559	Down-regulated
AKAP10	-1.32531	-13.8909	3.0882e-25	9.61974e-23	46.9036	Down-regulated
PXMP2	1.82173	13.7184	7.10659e-25	2.06612e-22	46.0801	Up-regulated
MYEF2	2.6133	13.6616	9.35475e-25	2.54975e-22	45.8085	Up-regulated
MAGOH	-0.884092	-13.5315	1.75925e-24	4.32452e-22	45.1843	Not-significant
CHTOP	1.74475	13.5233	1.83079e-24	4.32452e-22	45.145	Up-regulated
PPIA	-1.13775	-13.5173	1.88411e-24	4.32452e-22	45.1166	Down-regulated
GKN1	5.22164	13.252	6.8673e-24	1.49742e-21	43.8383	Up-regulated
CYSTM1	1.90762	13.2128	8.3176e-24	1.66893e-21	43.6489	Up-regulated
LSM1	1.88179	13.2104	8.41928e-24	1.66893e-21	43.6369	Up-regulated
AKR1C1	2.39982	13.1922	9.20176e-24	1.74473e-21	43.5491	Up-regulated
SLC39A14	-1.11646	-13.0656	1.71159e-23	3.11009e-21	42.9355	Down-regulated
PPP2R2D	-1.89414	-13.0518	1.83093e-23	3.19387e-21	42.8689	Down-regulated
SP2	2.25052	12.9379	3.20521e-23	5.37613e-21	42.3153	Up-regulated
CTDSP1	1.21443	12.8749	4.37004e-23	7.05842e-21	42.0088	Up-regulated
SPG21	-1.46812	-12.7588	7.74587e-23	1.20642e-20	41.4429	Down-regulated
GORASP1	-2.10481	-12.7112	9.8005e-23	1.47379e-20	41.2103	Down-regulated
LIPF	2.90348	12.6811	1.1372e-22	1.65312e-20	41.0632	Up-regulated
MDK	-2.39132	-12.6643	1.23564e-22	1.73826e-20	40.9811	Down-regulated
MAGED1	1.88068	12.6337	1.43778e-22	1.89032e-20	40.8313	Up-regulated
PGC	4.27502	12.6321	1.44913e-22	1.89032e-20	40.8235	Up-regulated
ALDH2	2.30649	12.6287	1.47376e-22	1.89032e-20	40.8069	Up-regulated
VPS37C	2.09488	12.605	1.65761e-22	2.06539e-20	40.6906	Up-regulated
SNRPF	-1.12521	-12.5833	1.84497e-22	2.21273e-20	40.5847	Down-regulated
GABPB1-AS1	-1.75862	-12.5798	1.87735e-22	2.21273e-20	40.5675	Down-regulated
ALDH3A1	2.22754	12.5694	1.97692e-22	2.26877e-20	40.5164	Up-regulated
IFT46	2.16163	12.544	2.24144e-22	2.50638e-20	40.3922	Up-regulated
TUBA4A	-1.32628	-12.5231	2.48719e-22	2.71166e-20	40.2894	Down-regulated
IFITM2	-1.57051	-12.4912	2.91287e-22	3.04886e-20	40.1331	Down-regulated
PSCA	3.40709	12.4896	2.9363e-22	3.04886e-20	40.1252	Up-regulated
H1-2	1.70719	12.4536	3.51125e-22	3.56106e-20	39.9484	Up-regulated
PCYT2	1.19427	12.4239	4.06881e-22	4.03275e-20	39.8026	Up-regulated
SMDT1	0.957539	12.3745	5.20072e-22	5.04007e-20	39.5599	Up-regulated
AP1M1	1.59705	12.3684	5.35948e-22	5.08102e-20	39.5302	Up-regulated
SLC25A19	1.31617	12.3127	7.07198e-22	6.56189e-20	39.2559	Up-regulated
KCNE2	2.453	12.2142	1.15493e-21	1.0493e-19	38.7709	Up-regulated
STEAP1	-1.08291	-12.1321	1.73932e-21	1.548e-19	38.3659	Down-regulated
IGHA1	3.0257	12.1196	1.85137e-21	1.61476e-19	38.3042	Up-regulated
TUBA1C	-0.944151	-12.0688	2.38655e-21	2.01244e-19	38.053	Down-regulated
TSNAX	2.02326	12.0677	2.39961e-21	2.01244e-19	38.0476	Up-regulated
RRP1	-1.05759	-12.0599	2.49434e-21	2.05242e-19	38.0093	Down-regulated
SELENOP	1.38443	12.0516	2.60113e-21	2.10066e-19	37.9679	Up-regulated
RIPK2	1.98365	12.0199	3.04767e-21	2.41652e-19	37.8112	Up-regulated
UBE2T	-1.66218	-11.9887	3.56114e-21	2.77324e-19	37.6572	Down-regulated
VSIG2	2.65234	11.9658	3.99452e-21	3.05616e-19	37.5436	Up-regulated
FAM102A	1.07666	11.9376	4.59889e-21	3.45789e-19	37.4042	Up-regulated
PCK1	1.06604	11.8601	6.78152e-21	5.01258e-19	37.0201	Up-regulated
CDX1	2.13971	11.8075	8.82918e-21	6.26527e-19	36.7591	Up-regulated
BAP1	-1.0597	-11.8069	8.85392e-21	6.26527e-19	36.7563	Down-regulated
CACYBP	-1.40509	-11.8057	8.90729e-21	6.26527e-19	36.7504	Down-regulated
CHMP5	1.29237	11.7476	1.19266e-20	8.25584e-19	36.4617	Up-regulated
VSIR	1.54478	11.729	1.30888e-20	8.9188e-19	36.3697	Up-regulated
MANBA	-1.03198	-11.6787	1.68565e-20	1.13094e-18	36.1195	Down-regulated
ROCK2	-0.992558	-11.6655	1.80113e-20	1.19011e-18	36.0539	Down-regulated
PNKD	-1.03573	-11.6244	2.21451e-20	1.44142e-18	35.8495	Down-regulated
GABARAPL1	1.62504	11.5901	2.63157e-20	1.68769e-18	35.6789	Up-regulated
PABPC4	1.21377	11.5856	2.6918e-20	1.7013e-18	35.6565	Up-regulated
PCCA	0.559011	11.5808	2.75708e-20	1.71766e-18	35.6328	Not-significant
UBE2C	-1.72923	-11.5621	3.03054e-20	1.86143e-18	35.5392	Down-regulated
PHAX	-0.773059	-11.53	3.56164e-20	2.15727e-18	35.3795	Not-significant
CAPN2	0.737936	11.512	3.89883e-20	2.32915e-18	35.29	Not-significant
HBB	2.38091	11.4373	5.68116e-20	3.34804e-18	34.9176	Up-regulated
YWHAB	-0.870546	-11.379	7.62114e-20	4.43144e-18	34.6271	Not-significant
NFE2L2	1.18331	11.3669	8.10313e-20	4.6497e-18	34.5664	Up-regulated
GID8	-0.921871	-11.3532	8.68081e-20	4.91649e-18	34.4983	Down-regulated
CCNB1	-1.08569	-11.3373	9.40953e-20	5.26089e-18	34.4185	Down-regulated
HPGD	1.55894	11.3308	9.72247e-20	5.36705e-18	34.3862	Up-regulated
SST	2.41699	11.3251	1.00052e-19	5.45407e-18	34.3578	Up-regulated
TALDO1	1.38327	11.3217	1.01781e-19	5.47984e-18	34.3409	Up-regulated
ENO1	-1.06617	-11.3177	1.0386e-19	5.5236e-18	34.3209	Down-regulated
CA9	2.75159	11.3073	1.09447e-19	5.75057e-18	34.2691	Up-regulated
XYLT2	2.05331	11.3014	1.12743e-19	5.85324e-18	34.2397	Up-regulated
PGRMC2	0.87771	11.2568	1.41242e-19	7.24656e-18	34.0168	Not-significant
DLEU2	-1.1323	-11.2402	1.53637e-19	7.79083e-18	33.9336	Down-regulated
ZNF136	-0.6756	-11.2292	1.62408e-19	8.14095e-18	33.8787	Not-significant
FBXW5	-1.02726	-11.2208	1.69433e-19	8.39655e-18	33.8368	Down-regulated
ID3	0.701824	11.2115	1.77597e-19	8.70227e-18	33.7902	Not-significant
HMGB1	-1.12455	-11.1863	2.01723e-19	9.77462e-18	33.6642	Down-regulated
HSPH1	-0.937343	-11.1376	2.58103e-19	1.23691e-17	33.4204	Down-regulated
SMG5	1.19501	11.1132	2.91986e-19	1.38408e-17	33.2984	Up-regulated
PLK1	-0.91629	-11.083	3.40186e-19	1.59177e-17	33.1473	Down-regulated
SSBP3	0.767883	11.0813	3.43101e-19	1.59177e-17	33.1389	Not-significant
LDHA	-1.52491	-11.0357	4.32066e-19	1.98341e-17	32.9108	Down-regulated
AP3B1	-1.03948	-11.0147	4.8059e-19	2.18318e-17	32.8055	Down-regulated
PPP1R1B	-0.983837	-11.0114	4.8881e-19	2.19763e-17	32.7888	Down-regulated
TOP2A	-1.93441	-10.9474	6.75949e-19	3.00797e-17	32.4681	Down-regulated
CCDC68	1.77957	10.9385	7.07003e-19	3.11439e-17	32.4237	Up-regulated
IGFBP7	-1.11473	-10.9277	7.4696e-19	3.25749e-17	32.3693	Down-regulated
TP53BP1	-0.784154	-10.9256	7.5479e-19	3.25905e-17	32.359	Not-significant
TPI1	1.00187	10.9208	7.73353e-19	3.30646e-17	32.335	Up-regulated
CD46	-0.994624	-10.9156	7.94027e-19	3.3619e-17	32.3089	Down-regulated
TUBA1A	-1.00204	-10.8923	8.93521e-19	3.74677e-17	32.1921	Down-regulated
CAPN9	0.800867	10.8647	1.02785e-18	4.26899e-17	32.0536	Not-significant
DGLUCY	0.812552	10.8302	1.22459e-18	5.03816e-17	31.8804	Not-significant
HMGB2	-1.17679	-10.7635	1.7178e-18	7.00126e-17	31.5456	Down-regulated
M6PR	-1.05546	-10.7419	1.91633e-18	7.73806e-17	31.4375	Down-regulated
GRB7	-1.11258	-10.7287	2.04962e-18	8.20036e-17	31.371	Down-regulated
AKR1B10	3.34508	10.7192	2.15012e-18	8.50814e-17	31.3236	Up-regulated
CFD	1.45018	10.7178	2.16557e-18	8.50814e-17	31.3165	Up-regulated
RPL26	-0.952999	-10.6922	2.46717e-18	9.60654e-17	31.1876	Down-regulated
CTSE	2.96126	10.6807	2.61494e-18	1.00918e-16	31.13	Up-regulated
PTGER2	0.756681	10.6754	2.68697e-18	1.02788e-16	31.1032	Not-significant
AKR1C3	1.99396	10.6589	2.92117e-18	1.10776e-16	31.0205	Up-regulated
PBXIP1	0.9528	10.6534	3.00399e-18	1.12934e-16	30.9929	Up-regulated
GPRC5C	1.06473	10.6444	3.14457e-18	1.16328e-16	30.9476	Up-regulated
MARCHF5	-1.03029	-10.6442	3.1476e-18	1.16328e-16	30.9467	Down-regulated
TUBB3	-0.955116	-10.6263	3.44673e-18	1.26312e-16	30.8569	Down-regulated
PYGL	-1.04722	-10.5971	3.99855e-18	1.45314e-16	30.71	Down-regulated
RAB27B	0.816834	10.5878	4.192e-18	1.51085e-16	30.6633	Not-significant
PLAAT2	1.15775	10.5706	4.57552e-18	1.63556e-16	30.5767	Up-regulated
CLIC1	-0.691183	-10.567	4.6581e-18	1.65154e-16	30.559	Not-significant
RBM28	-0.778357	-10.5625	4.76706e-18	1.67654e-16	30.5361	Not-significant
HPCAL1	1.36807	10.5603	4.82022e-18	1.68168e-16	30.5252	Up-regulated
RCC2	-1.26013	-10.54	5.34471e-18	1.84986e-16	30.423	Down-regulated
C20orf27	-1.27636	-10.5339	5.51399e-18	1.89343e-16	30.3922	Down-regulated
SH2D3A	-1.14523	-10.5031	6.44569e-18	2.19607e-16	30.2378	Down-regulated
POLR1C	-0.759207	-10.499	6.58436e-18	2.21807e-16	30.2167	Not-significant
COL3A1	-1.50746	-10.4981	6.61199e-18	2.21807e-16	30.2126	Down-regulated
NME1	-1.05276	-10.4863	7.02253e-18	2.3378e-16	30.153	Down-regulated
FRMD8	-0.995639	-10.43	9.3469e-18	3.08802e-16	29.8702	Down-regulated
ITGA10	0.648429	10.4161	1.00326e-17	3.28965e-16	29.8002	Not-significant
PFDN2	-0.912364	-10.4006	1.08555e-17	3.53289e-16	29.7223	Down-regulated
ADH1C	1.82073	10.396	1.11135e-17	3.59006e-16	29.699	Up-regulated
TFDP1	-1.03409	-10.3908	1.14121e-17	3.65942e-16	29.6728	Down-regulated
EVPL	-1.04315	-10.3683	1.27978e-17	4.07381e-16	29.5595	Down-regulated
HSPB1	-0.959678	-10.364	1.3076e-17	4.13221e-16	29.5382	Down-regulated
TXNDC5	0.861037	10.3601	1.33429e-17	4.18622e-16	29.5182	Not-significant
PLAU	-1.24639	-10.3441	1.44735e-17	4.5085e-16	29.4378	Down-regulated
CBX3	-0.910294	-10.3421	1.46172e-17	4.52095e-16	29.428	Down-regulated
ANXA2	-1.03607	-10.3341	1.52298e-17	4.67726e-16	29.3874	Down-regulated
TIMM13	-0.839202	-10.2854	1.95119e-17	5.95046e-16	29.1424	Not-significant
ERO1B	1.76939	10.2464	2.37957e-17	7.20647e-16	28.9462	Up-regulated
MPC1	1.09868	10.2249	2.65493e-17	7.96198e-16	28.8379	Up-regulated
SUGP2	1.56107	10.2241	2.66556e-17	7.96198e-16	28.8339	Up-regulated
PTMA	-0.671172	-10.2111	2.84779e-17	8.44845e-16	28.7685	Not-significant
ENC1	-0.891686	-10.1941	3.10497e-17	9.06613e-16	28.683	Not-significant
ATAD3A	-0.807437	-10.1935	3.11502e-17	9.06613e-16	28.6798	Not-significant
FSTL1	-1.62955	-10.1932	3.11837e-17	9.06613e-16	28.6788	Down-regulated
IMPA2	-1.2803	-10.1753	3.41588e-17	9.86535e-16	28.5887	Down-regulated
PHKG2	0.711209	10.1609	3.67645e-17	1.0548e-15	28.516	Not-significant
CALU	-1.01122	-10.1355	4.18295e-17	1.19228e-15	28.3884	Down-regulated
NQO1	1.1121	10.1339	4.21844e-17	1.19459e-15	28.38	Up-regulated
PPIB	-0.819368	-10.1273	4.36316e-17	1.2276e-15	28.3467	Not-significant
NOP56	-1.38071	-10.1154	4.63579e-17	1.29594e-15	28.2867	Down-regulated
ALDH4A1	-0.940369	-10.1116	4.72557e-17	1.31263e-15	28.2678	Down-regulated
TSC22D3	0.939437	10.0618	6.08758e-17	1.68025e-15	28.0173	Up-regulated
ZBTB4	-0.90556	-10.0353	6.96833e-17	1.91125e-15	27.8837	Down-regulated
PA2G4	-0.973371	-10.0306	7.13745e-17	1.94094e-15	27.86	Down-regulated
DCTPP1	-1.13333	-10.0298	7.1656e-17	1.94094e-15	27.8561	Down-regulated
VAV3	-0.783442	-10.0265	7.28883e-17	1.96213e-15	27.8393	Not-significant
PRDX3	0.736992	10.023	7.41985e-17	1.98515e-15	27.8217	Not-significant
TNIP2	-0.973817	-10.0152	7.72135e-17	2.04394e-15	27.7823	Down-regulated
TFRC	-1.30233	-10.0149	7.73331e-17	2.04394e-15	27.7808	Down-regulated
HBS1L	0.7803	9.99171	8.70024e-17	2.28565e-15	27.6643	Not-significant
SNRPC	-0.76524	-9.97887	9.28832e-17	2.42553e-15	27.5996	Not-significant
ALG3	-0.958106	-9.97378	9.53226e-17	2.47442e-15	27.574	Down-regulated
HSP90AA1	-1.13266	-9.97101	9.66741e-17	2.49139e-15	27.5601	Down-regulated
GPD2	0.66896	9.97011	9.71191e-17	2.49139e-15	27.5555	Not-significant
BST2	-1.49695	-9.96375	1.00317e-16	2.55836e-15	27.5235	Down-regulated
NPC2	1.40583	9.95672	1.03974e-16	2.63623e-15	27.4881	Up-regulated
ALCAM	1.19596	9.88861	1.47075e-16	3.70749e-15	27.1452	Up-regulated
HERC2P2	0.990376	9.88381	1.50719e-16	3.77751e-15	27.121	Up-regulated
ATP5PO	0.815206	9.84788	1.80973e-16	4.50984e-15	26.9402	Not-significant
CD9	-0.926982	-9.84612	1.82603e-16	4.52462e-15	26.9313	Down-regulated
TAF15	-0.620443	-9.8408	1.87618e-16	4.62262e-15	26.9045	Not-significant
OXCT1	0.959863	9.83666	1.91612e-16	4.69451e-15	26.8837	Up-regulated
ATP5F1D	2.27395	9.83015	1.98076e-16	4.82576e-15	26.8509	Up-regulated
ITGB1BP1	-0.790654	-9.81984	2.08754e-16	5.05764e-15	26.799	Not-significant
WDR83	0.735256	9.8164	2.12445e-16	5.11863e-15	26.7817	Not-significant
LARP4B	0.827692	9.80316	2.27255e-16	5.44501e-15	26.7151	Not-significant
TFF2	3.1277	9.8021	2.28488e-16	5.44501e-15	26.7097	Up-regulated
FAM193A	0.5279	9.78274	2.52165e-16	5.97658e-15	26.6123	Not-significant
CCNDBP1	0.793419	9.78075	2.54732e-16	6.00479e-15	26.6022	Not-significant
ADAMTS7	0.659674	9.77107	2.67594e-16	6.27408e-15	26.5535	Not-significant
CLU	1.38698	9.76675	2.73545e-16	6.3793e-15	26.5318	Up-regulated
DDX21	-1.1037	-9.75518	2.90154e-16	6.73064e-15	26.4735	Down-regulated
S100A6	-1.29394	-9.73834	3.16129e-16	7.29439e-15	26.3888	Down-regulated
HDGF	-0.545006	-9.73061	3.28816e-16	7.54719e-15	26.3499	Not-significant
AK3	0.610867	9.70529	3.74058e-16	8.54065e-15	26.2225	Not-significant
WBP2	0.484638	9.70061	3.83076e-16	8.701e-15	26.1989	Not-significant
AHCY	-0.598339	-9.68616	4.12319e-16	9.3167e-15	26.1262	Not-significant
ATP6V0E1	-0.71289	-9.64251	5.1493e-16	1.15753e-14	25.9065	Not-significant
HTRA1	-0.641158	-9.63552	5.33568e-16	1.19328e-14	25.8714	Not-significant
CSE1L	-1.27333	-9.62276	5.69386e-16	1.26688e-14	25.8072	Down-regulated
POMP	-0.676259	-9.62152	5.72988e-16	1.26843e-14	25.801	Not-significant
ARMC6	-0.890722	-9.61939	5.79226e-16	1.27576e-14	25.7903	Not-significant
LOC729218	0.882677	9.5852	6.89348e-16	1.50514e-14	25.6182	Not-significant
HLX	1.46664	9.58493	6.90274e-16	1.50514e-14	25.6169	Up-regulated
BOP1	-1.01586	-9.58212	7.00227e-16	1.51925e-14	25.6027	Down-regulated
CA2	1.52533	9.57616	7.218e-16	1.5583e-14	25.5728	Up-regulated
NTSR1	1.19056	9.56307	7.71519e-16	1.65541e-14	25.5069	Up-regulated
BGN	-0.931702	-9.56235	7.74371e-16	1.65541e-14	25.5033	Down-regulated
KATNA1	0.43758	9.54539	8.44163e-16	1.7958e-14	25.418	Not-significant
HNRNPF	-0.773902	-9.51446	9.88064e-16	2.09172e-14	25.2624	Not-significant
LUM	-1.2848	-9.51268	9.97057e-16	2.10056e-14	25.2535	Down-regulated
CLDN18	-0.99941	-9.50347	1.0449e-15	2.19078e-14	25.2072	Down-regulated
TUBB6	-0.800763	-9.48725	1.13479e-15	2.36786e-14	25.1256	Not-significant
BBLN	-0.556397	-9.47446	1.2111e-15	2.51505e-14	25.0613	Not-significant
IGLC1	1.93485	9.46901	1.24513e-15	2.57346e-14	25.0339	Up-regulated
TATDN1	-0.841381	-9.46704	1.25769e-15	2.58717e-14	25.024	Not-significant
ACADM	1.12347	9.46006	1.3031e-15	2.66799e-14	24.9889	Up-regulated
USP36	-0.908053	-9.4502	1.37014e-15	2.79213e-14	24.9394	Down-regulated
PLEKHJ1	0.724017	9.43804	1.45757e-15	2.95648e-14	24.8782	Not-significant
EXOSC8	1.19528	9.42898	1.52635e-15	3.08166e-14	24.8327	Up-regulated
C4orf3	1.09828	9.41246	1.66015e-15	3.32874e-14	24.7496	Up-regulated
MEST	-0.864057	-9.412	1.66399e-15	3.32874e-14	24.7474	Not-significant
DSG2	1.02251	9.40621	1.71372e-15	3.41257e-14	24.7183	Up-regulated
PTMS	-0.656058	-9.35409	2.23385e-15	4.4281e-14	24.4563	Not-significant
BSDC1	-0.932007	-9.32894	2.5385e-15	5.00922e-14	24.33	Down-regulated
FBL	-0.589464	-9.32524	2.58672e-15	5.08139e-14	24.3114	Not-significant
SYTL2	1.18443	9.27662	3.31192e-15	6.47681e-14	24.0673	Up-regulated
AKR7A2	1.07362	9.19994	4.88964e-15	9.51951e-14	23.6824	Up-regulated
MUTYH	1.04152	9.18944	5.15734e-15	9.99607e-14	23.6297	Up-regulated
SNRPG	-0.904085	-9.14841	6.35204e-15	1.22572e-13	23.4239	Down-regulated
FCHO1	0.871452	9.14233	6.55127e-15	1.25859e-13	23.3934	Not-significant
DNAJB14	0.711242	9.12264	7.24012e-15	1.38483e-13	23.2946	Not-significant
RCN1	-0.816998	-9.11151	7.66084e-15	1.45891e-13	23.2388	Not-significant
NUP153	-1.17467	-9.11058	7.69704e-15	1.45943e-13	23.2342	Down-regulated
SGK1	0.799563	9.10459	7.93471e-15	1.49798e-13	23.2041	Not-significant
EMC9	0.998939	9.09781	8.21242e-15	1.54372e-13	23.1702	Up-regulated
EIF3B	-0.939527	-9.08627	8.7076e-15	1.62978e-13	23.1123	Down-regulated
ARL6IP1	-0.88051	-9.07858	9.05401e-15	1.68549e-13	23.0738	Not-significant
PSD4	-0.765953	-9.07796	9.08254e-15	1.68549e-13	23.0707	Not-significant
IFI6	-1.35684	-9.03335	1.13893e-14	2.10461e-13	22.8472	Down-regulated
DYRK3	0.647618	9.03198	1.14686e-14	2.11032e-13	22.8403	Not-significant
SCARB1	-0.969885	-9.02466	1.19023e-14	2.18092e-13	22.8036	Down-regulated
ZBTB5	0.603584	9.01931	1.22298e-14	2.23156e-13	22.7768	Not-significant
AKR1B1	0.698768	9.0175	1.23426e-14	2.24275e-13	22.7678	Not-significant
ZMPSTE24	-0.679437	-9.01643	1.24098e-14	2.24561e-13	22.7624	Not-significant
CCND1	-0.65184	-9.01497	1.25019e-14	2.25292e-13	22.7551	Not-significant
SLC30A4	1.06476	9.01275	1.26437e-14	2.2691e-13	22.744	Up-regulated
NDOR1	0.519358	9.00024	1.34715e-14	2.40776e-13	22.6813	Not-significant
UBA7	1.64986	8.98114	1.48415e-14	2.64178e-13	22.5857	Up-regulated
RCN2	-0.7588	-8.97528	1.52888e-14	2.71035e-13	22.5564	Not-significant
CTSV	-0.757594	-8.96923	1.57653e-14	2.7835e-13	22.526	Not-significant
TXNRD2	0.71047	8.96454	1.61441e-14	2.8389e-13	22.5026	Not-significant
CLDN4	-2.43166	-8.95578	1.68769e-14	2.95582e-13	22.4588	Down-regulated
POLR2B	-0.926216	-8.94758	1.75928e-14	3.06889e-13	22.4177	Down-regulated
IRAK1	0.93267	8.9418	1.8116e-14	3.14756e-13	22.3888	Up-regulated
NR2C2	-0.658896	-8.93058	1.91762e-14	3.31854e-13	22.3326	Not-significant
TFF1	3.49544	8.9244	1.97858e-14	3.4105e-13	22.3017	Up-regulated
LSM5	-0.660057	-8.91215	2.10524e-14	3.61454e-13	22.2405	Not-significant
PSMA5	-0.687953	-8.90888	2.14047e-14	3.66062e-13	22.2241	Not-significant
KIF23	0.825769	8.8797	2.48129e-14	4.22691e-13	22.0782	Not-significant
DEPP1	0.976028	8.87485	2.54296e-14	4.30629e-13	22.0539	Up-regulated
FAM107B	1.07794	8.87449	2.54764e-14	4.30629e-13	22.0521	Up-regulated
SH3YL1	0.602644	8.86986	2.6081e-14	4.39148e-13	22.029	Not-significant
CCN3	0.957812	8.86579	2.66237e-14	4.46562e-13	22.0086	Up-regulated
PHKB	0.477866	8.84341	2.98171e-14	4.98208e-13	21.8968	Not-significant
GSN	1.09879	8.83382	3.13001e-14	5.20991e-13	21.8488	Up-regulated
LBR	-0.779138	-8.83	3.19109e-14	5.29139e-13	21.8298	Not-significant
KIAA0930	-0.719	-8.82152	3.33106e-14	5.50256e-13	21.7874	Not-significant
LGALS9	0.649451	8.82067	3.34533e-14	5.50527e-13	21.7832	Not-significant
REG1B	2.14086	8.80447	3.63119e-14	5.95324e-13	21.7022	Up-regulated
GNAI3	-0.653012	-8.79856	3.74144e-14	6.11101e-13	21.6727	Not-significant
GADD45G	-0.815316	-8.79428	3.82331e-14	6.22144e-13	21.6513	Not-significant
KIAA0100	0.791774	8.78985	3.90981e-14	6.33854e-13	21.6292	Not-significant
CACFD1	0.952752	8.78622	3.98231e-14	6.43217e-13	21.6111	Up-regulated
HSPA1A	-0.975187	-8.75302	4.71033e-14	7.57997e-13	21.4453	Down-regulated
FUCA1	0.967256	8.74961	4.79217e-14	7.68333e-13	21.4283	Up-regulated
KLF4	0.910747	8.74806	4.83e-14	7.71561e-13	21.4206	Up-regulated
DHX9	-0.587582	-8.74563	4.88959e-14	7.78231e-13	21.4084	Not-significant
GPX3	0.983637	8.73027	5.28441e-14	8.38011e-13	21.3318	Up-regulated
OSBPL1A	1.32244	8.70214	6.0915e-14	9.62502e-13	21.1915	Up-regulated
EXOC1	0.592884	8.67366	7.03405e-14	1.10742e-12	21.0495	Not-significant
ITGB4	0.72788	8.66829	7.22751e-14	1.13378e-12	21.0227	Not-significant
HERPUD1	0.808511	8.66128	7.48778e-14	1.1704e-12	20.9878	Not-significant
LOXL2	-0.353244	-8.63435	8.57813e-14	1.33604e-12	20.8536	Not-significant
TIMMDC1	-0.643413	-8.63038	8.75193e-14	1.35826e-12	20.8338	Not-significant
EPS15	0.826109	8.61945	9.24821e-14	1.43019e-12	20.7794	Not-significant
DPM2	-0.701179	-8.61519	9.44915e-14	1.4561e-12	20.7581	Not-significant
UBN1	0.834247	8.60354	1.00211e-13	1.5388e-12	20.7001	Not-significant
DNAJC24	-0.721274	-8.59373	1.05293e-13	1.61117e-12	20.6513	Not-significant
HNRNPA2B1	-0.699389	-8.59166	1.06399e-13	1.6224e-12	20.641	Not-significant
CA4	0.630071	8.59061	1.06967e-13	1.62537e-12	20.6358	Not-significant
GPD1L	0.633357	8.5705	1.18381e-13	1.79258e-12	20.5357	Not-significant
EZH2	-0.741986	-8.56216	1.23463e-13	1.86305e-12	20.4942	Not-significant
RAD21	-0.768616	-8.54404	1.35275e-13	2.03426e-12	20.404	Not-significant
CCT6A	-0.689892	-8.53336	1.42753e-13	2.13933e-12	20.351	Not-significant
SNRPA1	-0.759207	-8.52983	1.45313e-13	2.17024e-12	20.3334	Not-significant
PFAS	-0.549683	-8.52602	1.48134e-13	2.20483e-12	20.3144	Not-significant
GCAT	1.66014	8.51215	1.58854e-13	2.35634e-12	20.2455	Up-regulated
MCM3	-1.28286	-8.50982	1.60726e-13	2.37602e-12	20.2339	Down-regulated
BIN1	-0.743783	-8.50501	1.64672e-13	2.42613e-12	20.21	Not-significant
SLC9A3R1	1.65689	8.50275	1.66557e-13	2.44565e-12	20.1988	Up-regulated
ECI2	1.27028	8.50134	1.67743e-13	2.4548e-12	20.1918	Up-regulated
DTX3L	-0.68042	-8.49494	1.73239e-13	2.52396e-12	20.16	Not-significant
GABARAP	0.451152	8.49449	1.73627e-13	2.52396e-12	20.1578	Not-significant
RPS21	-0.85999	-8.48944	1.78105e-13	2.57249e-12	20.1326	Not-significant
G3BP1	-0.888667	-8.48939	1.78145e-13	2.57249e-12	20.1324	Not-significant
SNX14	0.541091	8.48243	1.84503e-13	2.65551e-12	20.0978	Not-significant
DCAKD	0.775892	8.44636	2.2123e-13	3.17363e-12	19.9187	Not-significant
LRP10	0.728301	8.44483	2.22937e-13	3.18763e-12	19.9111	Not-significant
EIF4A1	-0.64093	-8.43879	2.29819e-13	3.27529e-12	19.8811	Not-significant
SCP2	0.604729	8.42037	2.52133e-13	3.5816e-12	19.7897	Not-significant
ECD	-0.668481	-8.4154	2.58518e-13	3.66038e-12	19.765	Not-significant
RANGAP1	-0.760232	-8.40694	2.69751e-13	3.80707e-12	19.7231	Not-significant
CCT3	-0.622669	-8.40379	2.74055e-13	3.85534e-12	19.7074	Not-significant
MOAP1	0.756463	8.3632	3.36073e-13	4.71259e-12	19.5062	Not-significant
ARL14	0.947659	8.36214	3.3786e-13	4.72246e-12	19.501	Up-regulated
POLR2M	-0.48608	-8.34683	3.64884e-13	5.0839e-12	19.4251	Not-significant
GRN	-0.511181	-8.34281	3.72324e-13	5.17104e-12	19.4051	Not-significant
LRRFIP1	-0.603463	-8.33698	3.83384e-13	5.30774e-12	19.3763	Not-significant
TMSB10	-0.658227	-8.32741	4.02257e-13	5.55141e-12	19.3289	Not-significant
ZBTB7A	0.905391	8.3236	4.10011e-13	5.63163e-12	19.31	Up-regulated
ABRACL	-0.842066	-8.32329	4.10653e-13	5.63163e-12	19.3085	Not-significant
SSRP1	-0.519662	-8.30695	4.45751e-13	6.09379e-12	19.2276	Not-significant
ACTR3	0.544719	8.30266	4.55459e-13	6.20705e-12	19.2064	Not-significant
SGSM2	-0.536738	-8.28666	4.93532e-13	6.70497e-12	19.1272	Not-significant
GAA	0.896867	8.2835	5.01411e-13	6.79084e-12	19.1116	Not-significant
HADH	0.600692	8.28079	5.08289e-13	6.86269e-12	19.0981	Not-significant
ALAD	0.39042	8.27392	5.2609e-13	7.08111e-12	19.0642	Not-significant
CUEDC2	0.895211	8.26468	5.51053e-13	7.39429e-12	19.0184	Not-significant
F2RL1	1.74503	8.21685	7.0033e-13	9.36853e-12	18.782	Up-regulated
NDRG2	0.60726	8.21183	7.18148e-13	9.57744e-12	18.7573	Not-significant
CNDP2	0.569303	8.21122	7.2034e-13	9.57744e-12	18.7543	Not-significant
SAMM50	0.690578	8.20437	7.4548e-13	9.88157e-12	18.7204	Not-significant
RCOR1	0.89146	8.20072	7.59247e-13	1.0004e-11	18.7024	Not-significant
ATP5MF	-0.665356	-8.2007	7.59303e-13	1.0004e-11	18.7023	Not-significant
S100A10	-0.913734	-8.18301	8.29613e-13	1.08685e-11	18.615	Down-regulated
PLPP2	-0.729463	-8.18294	8.29905e-13	1.08685e-11	18.6146	Not-significant
CORO1C	-0.923264	-8.18136	8.36509e-13	1.09222e-11	18.6068	Down-regulated
HNRNPA3P1	-0.60332	-8.17342	8.70425e-13	1.13311e-11	18.5676	Not-significant
ANXA10	1.93272	8.16915	8.89213e-13	1.15412e-11	18.5466	Up-regulated
RTF2	-0.733051	-8.16752	8.96512e-13	1.16015e-11	18.5385	Not-significant
PBLD	1.35675	8.16578	9.04324e-13	1.16679e-11	18.53	Up-regulated
MRRF	-0.767854	-8.16382	9.13269e-13	1.17486e-11	18.5203	Not-significant
HNRNPU	-0.608867	-8.1617	9.22989e-13	1.18386e-11	18.5098	Not-significant
S100P	1.47727	8.16112	9.25698e-13	1.18386e-11	18.5069	Up-regulated
RBBP6	0.492698	8.14797	9.88627e-13	1.26064e-11	18.4421	Not-significant
SET	-0.771789	-8.13424	1.0589e-12	1.34632e-11	18.3744	Not-significant
NR2F2	0.501078	8.12084	1.13223e-12	1.43537e-11	18.3084	Not-significant
RBM47	0.85805	8.11969	1.13875e-12	1.43922e-11	18.3027	Not-significant
TXNIP	0.69666	8.11907	1.14229e-12	1.43922e-11	18.2996	Not-significant
C5orf15	0.52559	8.11857	1.14517e-12	1.43922e-11	18.2972	Not-significant
FAM3A	0.436792	8.11469	1.16758e-12	1.46317e-11	18.2781	Not-significant
IFI30	-0.887442	-8.10562	1.22173e-12	1.52664e-11	18.2334	Not-significant
NDUFB3	-0.457877	-8.08796	1.33442e-12	1.66269e-11	18.1464	Not-significant
SRP9	-0.480173	-8.08255	1.37099e-12	1.70338e-11	18.1197	Not-significant
NDUFV3	0.47325	8.07885	1.39651e-12	1.73016e-11	18.1016	Not-significant
LGALS1	-0.898631	-8.05654	1.56107e-12	1.92856e-11	17.9917	Not-significant
PSMC4	-0.607624	-8.03929	1.70143e-12	2.09603e-11	17.9069	Not-significant
PPP1R13L	-0.633083	-8.03825	1.71022e-12	2.10092e-11	17.9018	Not-significant
DHCR24	0.748723	8.03641	1.72604e-12	2.11439e-11	17.8927	Not-significant
CDCA7	-1.01758	-8.02846	1.79584e-12	2.19374e-11	17.8536	Down-regulated
PTDSS1	-0.974004	-8.00584	2.01025e-12	2.4488e-11	17.7425	Down-regulated
SRPRA	1.15732	7.99561	2.1154e-12	2.56971e-11	17.6922	Up-regulated
HSPBP1	-0.806833	-7.98301	2.25255e-12	2.72871e-11	17.6303	Not-significant
FBXO21	-0.521811	-7.97405	2.35534e-12	2.84532e-11	17.5863	Not-significant
DDX60	1.25593	7.96775	2.43041e-12	2.92502e-11	17.5554	Up-regulated
ST6GALNAC1	1.19979	7.96739	2.43472e-12	2.92502e-11	17.5537	Up-regulated
CNPY2	0.574061	7.96409	2.47512e-12	2.96539e-11	17.5375	Not-significant
EIF4A3	-0.483788	-7.95282	2.61801e-12	3.12799e-11	17.4821	Not-significant
TCF25	0.396396	7.94712	2.69324e-12	3.20728e-11	17.4542	Not-significant
PRELID3B	-0.920757	-7.94669	2.69909e-12	3.20728e-11	17.4521	Down-regulated
PTGES3L-AARSD1	0.650162	7.94505	2.72126e-12	3.22484e-11	17.444	Not-significant
ISG15	-1.22387	-7.94334	2.74451e-12	3.24358e-11	17.4356	Down-regulated
TAP1	-1.02383	-7.93579	2.84953e-12	3.35859e-11	17.3986	Down-regulated
PHYH	0.677607	7.92006	3.08147e-12	3.62219e-11	17.3215	Not-significant
TCP1	-0.600663	-7.90614	3.30236e-12	3.87139e-11	17.2533	Not-significant
MRPL3	-0.740056	-7.88657	3.63969e-12	4.25541e-11	17.1575	Not-significant
CTSZ	-0.801471	-7.88416	3.68365e-12	4.29529e-11	17.1457	Not-significant
NCLN	-0.513976	-7.87246	3.90413e-12	4.54024e-11	17.0884	Not-significant
BLVRB	0.833453	7.86717	4.00811e-12	4.64877e-11	17.0625	Not-significant
PRNP	-0.508829	-7.85541	4.24911e-12	4.91521e-11	17.005	Not-significant
ISG20	0.959331	7.83058	4.80646e-12	5.54523e-11	16.8835	Up-regulated
RBFA	0.704946	7.82748	4.88087e-12	5.61622e-11	16.8684	Not-significant
PDCD5	-1.17028	-7.82527	4.93476e-12	5.66329e-11	16.8576	Down-regulated
CHDH	1.14292	7.82407	4.96421e-12	5.68213e-11	16.8517	Up-regulated
ARSA	0.485451	7.82255	5.00171e-12	5.71006e-11	16.8443	Not-significant
ANG	0.568257	7.81993	5.06731e-12	5.76985e-11	16.8315	Not-significant
NAT10	-0.533178	-7.80035	5.58398e-12	6.3416e-11	16.7358	Not-significant
DNAJC15	0.746194	7.79257	5.80354e-12	6.57383e-11	16.6978	Not-significant
ZYX	-0.442808	-7.791	5.84875e-12	6.60788e-11	16.6902	Not-significant
KRT7	-1.01686	-7.78185	6.12012e-12	6.8966e-11	16.6455	Down-regulated
SPSB2	-0.718812	-7.7751	6.32822e-12	7.11272e-11	16.6126	Not-significant
ATP5PF	0.453749	7.74322	7.41033e-12	8.30757e-11	16.4571	Not-significant
PSPHP1	0.777923	7.74217	7.44921e-12	8.32975e-11	16.452	Not-significant
RNPS1	-0.516019	-7.73941	7.55144e-12	8.42246e-11	16.4385	Not-significant
MTCH2	-0.58092	-7.7378	7.61208e-12	8.46844e-11	16.4307	Not-significant
ZSCAN31	-0.603996	-7.73086	7.87808e-12	8.72868e-11	16.3968	Not-significant
SLC25A37	-0.798556	-7.73065	7.88604e-12	8.72868e-11	16.3958	Not-significant
ANAPC1	-0.594858	-7.72963	7.92591e-12	8.75061e-11	16.3909	Not-significant
SEMA3E	0.456231	7.71049	8.713e-12	9.5953e-11	16.2976	Not-significant
PCNA	-0.798487	-7.70861	8.7943e-12	9.66044e-11	16.2885	Not-significant
UBE4A	0.505551	7.70204	9.08491e-12	9.95375e-11	16.2565	Not-significant
PRC1	-0.946059	-7.70155	9.10696e-12	9.95375e-11	16.2541	Down-regulated
MRGBP	-0.787812	-7.69234	9.53107e-12	1.03912e-10	16.2093	Not-significant
BUB3	-0.918927	-7.69043	9.62147e-12	1.04637e-10	16.2	Down-regulated
DAG1	-0.809639	-7.68721	9.77583e-12	1.06051e-10	16.1843	Not-significant
ACADSB	0.74784	7.67895	1.0183e-11	1.10194e-10	16.1441	Not-significant
RNF11	0.815773	7.67603	1.03308e-11	1.11517e-10	16.1299	Not-significant
RHEB	-0.444353	-7.64254	1.21885e-11	1.31244e-10	15.9671	Not-significant
RIPK4	0.515064	7.62121	1.35404e-11	1.45443e-10	15.8636	Not-significant
CDC42EP3	0.944933	7.6084	1.44234e-11	1.54547e-10	15.8014	Up-regulated
DPH5	0.656802	7.60774	1.44704e-11	1.5467e-10	15.7982	Not-significant
GRB2	-0.522157	-7.60685	1.45341e-11	1.54971e-10	15.7938	Not-significant
ATMIN	0.840186	7.60103	1.49566e-11	1.59087e-10	15.7656	Not-significant
CENPK	-0.661686	-7.59837	1.51542e-11	1.60797e-10	15.7527	Not-significant
CHPT1	0.68934	7.59128	1.56926e-11	1.66105e-10	15.7183	Not-significant
FBLIM1	-0.878661	-7.58787	1.59584e-11	1.6851e-10	15.7018	Not-significant
GSTA4	0.601151	7.58713	1.60169e-11	1.68719e-10	15.6982	Not-significant
ARPC5	-0.433224	-7.58084	1.65208e-11	1.73607e-10	15.6677	Not-significant
SNRPA	0.961773	7.57771	1.67773e-11	1.75879e-10	15.6525	Up-regulated
LARP1	0.662581	7.57019	1.74101e-11	1.82075e-10	15.6161	Not-significant
TGFBI	-0.677151	-7.56676	1.77072e-11	1.8455e-10	15.5994	Not-significant
LTF	1.66107	7.56648	1.77314e-11	1.8455e-10	15.5981	Up-regulated
CTSD	1.21568	7.56082	1.82323e-11	1.89312e-10	15.5707	Up-regulated
DBNDD2	-0.695876	-7.55396	1.88578e-11	1.95341e-10	15.5375	Not-significant
AURKB	-0.616224	-7.51914	2.23802e-11	2.3128e-10	15.3689	Not-significant
VAMP8	0.527158	7.51747	2.25648e-11	2.32636e-10	15.3608	Not-significant
TRIM14	0.625559	7.50308	2.42182e-11	2.49093e-10	15.2913	Not-significant
GOT1	0.453429	7.49691	2.49629e-11	2.56148e-10	15.2615	Not-significant
GPX1	-0.545038	-7.49552	2.51333e-11	2.57292e-10	15.2548	Not-significant
XPA	0.488593	7.48139	2.6939e-11	2.75131e-10	15.1865	Not-significant
PAFAH1B3	-0.751201	-7.47581	2.76877e-11	2.82117e-10	15.1595	Not-significant
GPRC5A	-0.867237	-7.47517	2.77737e-11	2.82333e-10	15.1565	Not-significant
RBM25	-0.398606	-7.47207	2.82004e-11	2.86005e-10	15.1415	Not-significant
PIGS	-0.533053	-7.43112	3.44702e-11	3.4878e-10	14.9439	Not-significant
IGLJ3	1.31208	7.42992	3.46749e-11	3.5004e-10	14.9381	Up-regulated
CFB	1.35387	7.42652	3.52564e-11	3.54552e-10	14.9217	Up-regulated
PSMA1	-0.481558	-7.42636	3.52845e-11	3.54552e-10	14.921	Not-significant
GGCT	-0.460272	-7.418	3.67596e-11	3.68525e-10	14.8807	Not-significant
ARF3	0.707819	7.41558	3.71964e-11	3.72049e-10	14.869	Not-significant
MAP4	-0.569093	-7.41065	3.81055e-11	3.8027e-10	14.8453	Not-significant
CDK4	-0.540118	-7.40748	3.87015e-11	3.85336e-10	14.83	Not-significant
SLC44A2	0.793487	7.40364	3.94369e-11	3.91763e-10	14.8115	Not-significant
ITGAV	-0.581141	-7.4013	3.98902e-11	3.95367e-10	14.8003	Not-significant
FCGBP	1.76477	7.39698	4.07422e-11	4.02895e-10	14.7795	Up-regulated
RAN	-0.406295	-7.39401	4.13397e-11	4.07587e-10	14.7651	Not-significant
SOD2	-0.658659	-7.39369	4.14035e-11	4.07587e-10	14.7636	Not-significant
IL10RB	0.686808	7.36926	4.66592e-11	4.5829e-10	14.6461	Not-significant
OAS3	0.795402	7.36379	4.79235e-11	4.6965e-10	14.6198	Not-significant
ENTPD5	0.746778	7.34352	5.2913e-11	5.17385e-10	14.5224	Not-significant
USP24	-0.622342	-7.34258	5.31555e-11	5.18593e-10	14.5179	Not-significant
COBLL1	0.491887	7.33343	5.55864e-11	5.41099e-10	14.4739	Not-significant
ANXA5	-0.527048	-7.31825	5.98603e-11	5.81405e-10	14.401	Not-significant
FGFR1OP2	0.847352	7.31188	6.1749e-11	5.97523e-10	14.3705	Not-significant
CYBC1	-0.398584	-7.31144	6.18826e-11	5.97523e-10	14.3683	Not-significant
IGF1R	0.559501	7.31128	6.19309e-11	5.97523e-10	14.3676	Not-significant
PIM1	0.404276	7.30246	6.46538e-11	6.22396e-10	14.3253	Not-significant
MIDEAS	-0.580198	-7.30201	6.47943e-11	6.22396e-10	14.3231	Not-significant
UNC45A	0.712966	7.28328	7.09886e-11	6.80399e-10	14.2334	Not-significant
GOLGA2P10	1.00405	7.28114	7.17353e-11	6.86048e-10	14.2231	Up-regulated
GSPT1	0.854304	7.27776	7.29265e-11	6.95914e-10	14.2069	Not-significant
MRAP2	0.606291	7.27606	7.35336e-11	7.00175e-10	14.1987	Not-significant
LMNA	-0.819767	-7.272	7.49998e-11	7.1258e-10	14.1793	Not-significant
BOLA2-SMG1P6	-0.497687	-7.26996	7.57488e-11	7.18132e-10	14.1695	Not-significant
NUDT5	-0.693563	-7.26796	7.64913e-11	7.23598e-10	14.1599	Not-significant
ZNF691	-0.669676	-7.26419	7.7907e-11	7.35395e-10	14.1419	Not-significant
ACOT7	0.638138	7.26314	7.83081e-11	7.37585e-10	14.1369	Not-significant
ZNF592	-0.707707	-7.26122	7.90448e-11	7.42919e-10	14.1277	Not-significant
DCP1A	-0.533489	-7.25903	7.98917e-11	7.49264e-10	14.1172	Not-significant
HSBP1	-0.502183	-7.25171	8.27878e-11	7.74758e-10	14.0822	Not-significant
UTP4	-0.785126	-7.24628	8.50035e-11	7.93791e-10	14.0562	Not-significant
ADAR	-0.449021	-7.24309	8.63368e-11	8.04519e-10	14.0409	Not-significant
EZH1	0.38775	7.24005	8.7621e-11	8.14744e-10	14.0264	Not-significant
NDUFS6	-0.601215	-7.2363	8.92344e-11	8.27982e-10	14.0084	Not-significant
WNT5A	-0.560124	-7.2357	8.94954e-11	8.2864e-10	14.0056	Not-significant
CALD1	-1.13311	-7.22265	9.53588e-11	8.81059e-10	13.9432	Down-regulated
MIF	-0.658076	-7.2197	9.67343e-11	8.91878e-10	13.9291	Not-significant
TBRG4	-0.615127	-7.21888	9.71222e-11	8.93565e-10	13.9252	Not-significant
FSTL3	-0.866164	-7.20012	1.06392e-10	9.76789e-10	13.8356	Not-significant
BCL7B	-0.598351	-7.19792	1.07533e-10	9.85188e-10	13.8251	Not-significant
HOOK1	0.347091	7.19585	1.08621e-10	9.93072e-10	13.8152	Not-significant
TPD52L2	-0.564982	-7.18052	1.17015e-10	1.06758e-09	13.742	Not-significant
SRSF1	-0.504627	-7.17929	1.17711e-10	1.07084e-09	13.7362	Not-significant
PBX4	-0.622294	-7.17903	1.17864e-10	1.07084e-09	13.7349	Not-significant
INSIG1	-1.05467	-7.17304	1.21339e-10	1.09855e-09	13.7063	Down-regulated
OSBPL9	0.557404	7.17291	1.21418e-10	1.09855e-09	13.7057	Not-significant
PPP2R5C	0.370653	7.1721	1.21895e-10	1.10058e-09	13.7019	Not-significant
HEXB	-0.54754	-7.16596	1.25576e-10	1.13148e-09	13.6726	Not-significant
MOCS2	0.490682	7.15695	1.31188e-10	1.17842e-09	13.6296	Not-significant
BLOC1S1	0.383455	7.15673	1.31326e-10	1.17842e-09	13.6286	Not-significant
CHCHD2	-0.467561	-7.14921	1.362e-10	1.2188e-09	13.5928	Not-significant
TRIM25	-0.505429	-7.14893	1.36385e-10	1.2188e-09	13.5915	Not-significant
RFC4	-0.989068	-7.14265	1.40602e-10	1.25392e-09	13.5615	Down-regulated
SLAIN2	0.534648	7.14154	1.41361e-10	1.25811e-09	13.5562	Not-significant
RND1	1.32185	7.1359	1.45276e-10	1.29033e-09	13.5294	Up-regulated
SCAMP1	0.471676	7.13265	1.47584e-10	1.30816e-09	13.5139	Not-significant
DDAH2	-0.696557	-7.1268	1.51824e-10	1.34301e-09	13.4861	Not-significant
SLX4	-0.784343	-7.1224	1.5509e-10	1.36912e-09	13.4652	Not-significant
NHSL1	-0.509629	-7.12194	1.55439e-10	1.36943e-09	13.4629	Not-significant
GATM	0.614435	7.11839	1.5813e-10	1.39033e-09	13.4461	Not-significant
YWHAQ	-0.478655	-7.09501	1.77068e-10	1.55371e-09	13.3349	Not-significant
SRSF2	-0.397202	-7.08898	1.82312e-10	1.59438e-09	13.3062	Not-significant
TXNDC11	0.584838	7.08884	1.82434e-10	1.59438e-09	13.3056	Not-significant
PIK3C2B	0.435186	7.08627	1.84714e-10	1.61107e-09	13.2934	Not-significant
PRDX5	0.744351	7.07958	1.90782e-10	1.66068e-09	13.2616	Not-significant
ACADVL	0.407697	7.078	1.92244e-10	1.67007e-09	13.2541	Not-significant
HDAC2	-0.571418	-7.06102	2.08676e-10	1.80566e-09	13.1735	Not-significant
EWSR1	-0.442198	-7.06102	2.0868e-10	1.80566e-09	13.1735	Not-significant
SCNN1A	0.715984	7.0547	2.15144e-10	1.85791e-09	13.1436	Not-significant
CSRNP1	0.457489	7.04331	2.27302e-10	1.95902e-09	13.0896	Not-significant
UQCRQ	0.582956	7.04144	2.29363e-10	1.97288e-09	13.0807	Not-significant
HMGCL	0.692164	7.02222	2.5164e-10	2.16024e-09	12.9896	Not-significant
SSBP2	-0.610022	-7.01297	2.63119e-10	2.25434e-09	12.9458	Not-significant
RPS19	-0.492889	-7.00728	2.70428e-10	2.31242e-09	12.9189	Not-significant
COA4	-0.750942	-7.00318	2.75825e-10	2.35396e-09	12.8995	Not-significant
ALDH1A1	1.24049	7.00142	2.78168e-10	2.36932e-09	12.8912	Up-regulated
PMM1	1.05015	6.99092	2.92589e-10	2.48729e-09	12.8416	Up-regulated
METTL17	0.475312	6.98156	3.06079e-10	2.59691e-09	12.7973	Not-significant
YWHAG	-0.424266	-6.97184	3.20732e-10	2.71369e-09	12.7514	Not-significant
MYO1A	0.821296	6.97161	3.21088e-10	2.71369e-09	12.7503	Not-significant
NARF	-0.615418	-6.96883	3.25413e-10	2.74492e-09	12.7371	Not-significant
STX5	0.498427	6.95359	3.50142e-10	2.94782e-09	12.6652	Not-significant
NONO	-0.479338	-6.95192	3.52959e-10	2.9658e-09	12.6573	Not-significant
ADIPOR2	0.477453	6.94889	3.58143e-10	3.00358e-09	12.643	Not-significant
JUN	0.565021	6.94402	3.66615e-10	3.06873e-09	12.6201	Not-significant
PCGF5	-0.563199	-6.94331	3.67866e-10	3.0733e-09	12.6167	Not-significant
TK2	0.79941	6.94269	3.68968e-10	3.07662e-09	12.6138	Not-significant
PEX19	0.395541	6.94072	3.72476e-10	3.09993e-09	12.6045	Not-significant
OPLAH	-0.479392	-6.93934	3.74958e-10	3.11465e-09	12.598	Not-significant
IARS2	-0.620813	-6.93725	3.78733e-10	3.14003e-09	12.5881	Not-significant
BAX	-0.484989	-6.93551	3.81912e-10	3.16038e-09	12.5799	Not-significant
MCM7	-0.619746	-6.9334	3.85797e-10	3.18419e-09	12.57	Not-significant
USP6NL	-0.619883	-6.93316	3.8625e-10	3.18419e-09	12.5688	Not-significant
PSMB4	-0.598204	-6.93269	3.87123e-10	3.18537e-09	12.5666	Not-significant
AP2M1	-0.428729	-6.9274	3.97083e-10	3.26116e-09	12.5417	Not-significant
NME2	-0.513163	-6.92333	4.04906e-10	3.31916e-09	12.5225	Not-significant
PTRH2	-0.453826	-6.90767	4.36494e-10	3.57139e-09	12.4488	Not-significant
SEM1	-0.548491	-6.90633	4.39312e-10	3.58771e-09	12.4425	Not-significant
COA3	0.816711	6.89696	4.59505e-10	3.74561e-09	12.3983	Not-significant
TRIM47	-0.807654	-6.89464	4.64639e-10	3.78039e-09	12.3874	Not-significant
GTF2F2	-0.353107	-6.89092	4.73008e-10	3.84131e-09	12.3699	Not-significant
ZNF443	0.296158	6.88771	4.80333e-10	3.89355e-09	12.3548	Not-significant
PLCG1	-1.13597	-6.8845	4.87767e-10	3.94648e-09	12.3397	Down-regulated
PSME3	-0.624937	-6.8821	4.93423e-10	3.98469e-09	12.3284	Not-significant
SMIM24	1.14936	6.88171	4.94339e-10	3.98469e-09	12.3266	Up-regulated
ZC3H11A	-0.576382	-6.88133	4.95231e-10	3.98469e-09	12.3248	Not-significant
ANAPC7	0.379137	6.87781	5.03658e-10	4.04503e-09	12.3083	Not-significant
VGLL1	-0.514304	-6.87491	5.10696e-10	4.09401e-09	12.2946	Not-significant
WWP2	0.45792	6.87413	5.12614e-10	4.10186e-09	12.291	Not-significant
TKFC	0.439367	6.8709	5.206e-10	4.15812e-09	12.2758	Not-significant
MKI67	-0.993213	-6.86982	5.23283e-10	4.17191e-09	12.2707	Down-regulated
PEPD	-0.602512	-6.86944	5.24256e-10	4.17204e-09	12.2689	Not-significant
ATP13A3	-0.708737	-6.8626	5.41688e-10	4.30292e-09	12.2368	Not-significant
NGRN	-0.405517	-6.86034	5.47576e-10	4.34178e-09	12.2262	Not-significant
TIMM8B	-0.42765	-6.84949	5.76743e-10	4.56475e-09	12.1753	Not-significant
ACTR3B	0.346821	6.84487	5.89652e-10	4.65847e-09	12.1535	Not-significant
ZDHHC3	0.597094	6.8402	6.02965e-10	4.75503e-09	12.1316	Not-significant
GET3	-0.624891	-6.83905	6.06267e-10	4.77244e-09	12.1263	Not-significant
ARID1A	0.304862	6.83306	6.23883e-10	4.90226e-09	12.0982	Not-significant
CEP55	-0.421432	-6.82661	6.43405e-10	5.04656e-09	12.0679	Not-significant
ATP2A1	-0.296096	-6.82363	6.52636e-10	5.10978e-09	12.0539	Not-significant
ARIH2	0.386597	6.81175	6.90706e-10	5.39815e-09	11.9983	Not-significant
XRCC5	-0.402299	-6.80645	7.08434e-10	5.5268e-09	11.9734	Not-significant
TRIP6	-0.901742	-6.8005	7.2882e-10	5.67569e-09	11.9456	Down-regulated
TNFAIP2	-0.56588	-6.79833	7.36404e-10	5.72452e-09	11.9354	Not-significant
MARCHF6	0.291831	6.79496	7.48347e-10	5.80701e-09	11.9197	Not-significant
MBIP	0.87431	6.79411	7.5139e-10	5.82027e-09	11.9157	Not-significant
DEGS1	-0.537077	-6.79148	7.60848e-10	5.88308e-09	11.9034	Not-significant
SNRPD2	-0.408312	-6.79011	7.65838e-10	5.91118e-09	11.897	Not-significant
H2AZ1	-0.702222	-6.78679	7.78053e-10	5.99485e-09	11.8815	Not-significant
ERAP2	-0.361589	-6.77003	8.4277e-10	6.48204e-09	11.8031	Not-significant
USP39	-0.434228	-6.76519	8.6241e-10	6.62142e-09	11.7805	Not-significant
ABCD3	0.532744	6.7629	8.7188e-10	6.68237e-09	11.7697	Not-significant
NXT1	-0.609952	-6.75785	8.93093e-10	6.83295e-09	11.7462	Not-significant
FAM214A	0.44326	6.75743	8.94889e-10	6.83469e-09	11.7442	Not-significant
SAE1	-0.625436	-6.74599	9.4495e-10	7.20442e-09	11.6908	Not-significant
LSM8	-0.425155	-6.74414	9.53303e-10	7.25542e-09	11.6822	Not-significant
KNG1	0.389114	6.73892	9.77278e-10	7.42493e-09	11.6578	Not-significant
APH1A	-0.424498	-6.73444	9.98306e-10	7.56239e-09	11.6369	Not-significant
CTSK	-0.83304	-6.73433	9.98839e-10	7.56239e-09	11.6364	Not-significant
NELFCD	-0.857043	-6.73133	1.0132e-09	7.6578e-09	11.6224	Not-significant
CALB1	0.320684	6.72963	1.02141e-09	7.70653e-09	11.6145	Not-significant
PGS1	-0.577781	-6.72817	1.02852e-09	7.74674e-09	11.6077	Not-significant
NIPBL	-0.611883	-6.72271	1.05556e-09	7.92657e-09	11.5822	Not-significant
NOTCH2	0.644884	6.72262	1.05603e-09	7.92657e-09	11.5818	Not-significant
PLP2	-0.726098	-6.71718	1.08366e-09	8.11998e-09	11.5564	Not-significant
PLSCR1	-0.779107	-6.71576	1.09099e-09	8.16094e-09	11.5498	Not-significant
ATXN7L3B	0.803874	6.71335	1.10355e-09	8.24075e-09	11.5386	Not-significant
RAB27A	0.435248	6.70323	1.1579e-09	8.63179e-09	11.4914	Not-significant
DHRS2	-0.372952	-6.6862	1.25534e-09	9.34222e-09	11.4122	Not-significant
PIGL	-0.370833	-6.67872	1.30068e-09	9.66316e-09	11.3774	Not-significant
H3-3A	-0.379479	-6.67316	1.33543e-09	9.90445e-09	11.3516	Not-significant
PLLP	0.49222	6.6718	1.34404e-09	9.95134e-09	11.3453	Not-significant
FAR1	0.350487	6.66904	1.36175e-09	1.00654e-08	11.3324	Not-significant
CCHCR1	0.318628	6.6683	1.36654e-09	1.00837e-08	11.329	Not-significant
SRI	-0.840976	-6.64987	1.49117e-09	1.09848e-08	11.2434	Not-significant
SCNN1B	0.335158	6.62631	1.66705e-09	1.22597e-08	11.1341	Not-significant
PSMA7	-0.716588	-6.6203	1.71506e-09	1.25916e-08	11.1062	Not-significant
GBA2	0.543047	6.61273	1.77757e-09	1.30285e-08	11.0712	Not-significant
FBXW4	-0.513906	-6.60863	1.81233e-09	1.3261e-08	11.0522	Not-significant
SAAL1	0.418302	6.59634	1.92054e-09	1.40293e-08	10.9953	Not-significant
C1orf198	1.12485	6.59294	1.95165e-09	1.42327e-08	10.9796	Up-regulated
SCAMP3	0.608584	6.58822	1.9956e-09	1.45289e-08	10.9577	Not-significant
UBL3	0.857598	6.57991	2.07541e-09	1.50847e-08	10.9193	Not-significant
SUPT6H	0.766912	6.57601	2.11394e-09	1.53392e-08	10.9013	Not-significant
TROAP	0.314169	6.56825	2.19271e-09	1.58844e-08	10.8654	Not-significant
RAB3D	0.679612	6.55757	2.3058e-09	1.6676e-08	10.8161	Not-significant
DENND2B	1.35264	6.55131	2.3748e-09	1.71466e-08	10.7872	Up-regulated
CC2D1A	-0.711483	-6.54459	2.45117e-09	1.76171e-08	10.7562	Not-significant
TMEM60	0.511189	6.54458	2.45123e-09	1.76171e-08	10.7562	Not-significant
PSEN1	0.397457	6.54451	2.45209e-09	1.76171e-08	10.7558	Not-significant
RAB11A	0.511253	6.54037	2.50029e-09	1.79339e-08	10.7368	Not-significant
S100A11	-0.686267	-6.53965	2.50877e-09	1.79651e-08	10.7335	Not-significant
IL27RA	0.789406	6.53801	2.52824e-09	1.80748e-08	10.7259	Not-significant
THOC3	-0.675103	-6.53536	2.56002e-09	1.82721e-08	10.7136	Not-significant
DDT	0.574908	6.53085	2.6149e-09	1.86333e-08	10.6929	Not-significant
TFPI	-0.427756	-6.52773	2.6535e-09	1.88775e-08	10.6785	Not-significant
IPO7	-0.605967	-6.51974	2.75507e-09	1.95682e-08	10.6417	Not-significant
CDIPT	0.473733	6.51886	2.76655e-09	1.96177e-08	10.6376	Not-significant
UTP20	-0.512436	-6.51489	2.81867e-09	1.99549e-08	10.6193	Not-significant
CIZ1	-0.54102	-6.50969	2.88829e-09	2.04147e-08	10.5954	Not-significant
HSPBAP1	-0.438976	-6.50804	2.91083e-09	2.05407e-08	10.5878	Not-significant
NDRG1	0.58884	6.49162	3.14412e-09	2.21511e-08	10.5123	Not-significant
SRSF4	-0.48707	-6.4902	3.16515e-09	2.22437e-08	10.5057	Not-significant
NUP107	-0.790944	-6.49004	3.16747e-09	2.22437e-08	10.505	Not-significant
AFDN	0.295985	6.48862	3.18867e-09	2.23566e-08	10.4985	Not-significant
PUS7	-0.55136	-6.48597	3.22857e-09	2.26e-08	10.4863	Not-significant
ACAA2	-0.823718	-6.48389	3.26028e-09	2.27854e-08	10.4767	Not-significant
MLPH	0.899511	6.48225	3.28546e-09	2.29049e-08	10.4692	Not-significant
PRMT2	-0.39715	-6.48209	3.28789e-09	2.29049e-08	10.4685	Not-significant
RPL32	0.508053	6.45786	3.68328e-09	2.56185e-08	10.3572	Not-significant
CD44	-0.893115	-6.45316	3.76528e-09	2.61471e-08	10.3357	Not-significant
B3GAT3	-0.606184	-6.45223	3.78159e-09	2.62186e-08	10.3314	Not-significant
ABLIM1	0.592823	6.45107	3.80222e-09	2.63198e-08	10.3261	Not-significant
UFSP2	0.42607	6.45046	3.81323e-09	2.63542e-08	10.3233	Not-significant
NR1D1	0.342753	6.44868	3.84502e-09	2.65318e-08	10.3152	Not-significant
PRSS36	1.05391	6.44812	3.85511e-09	2.65594e-08	10.3126	Up-regulated
HMGN5	0.577988	6.43948	4.01418e-09	2.76118e-08	10.273	Not-significant
POLR3H	0.827681	6.4391	4.02133e-09	2.76174e-08	10.2712	Not-significant
IDS	-0.61854	-6.43286	4.14046e-09	2.83908e-08	10.2427	Not-significant
UTP3	-0.445742	-6.42573	4.28084e-09	2.93073e-08	10.21	Not-significant
ABCA2	0.718318	6.42201	4.35591e-09	2.97745e-08	10.193	Not-significant
GRK6	0.682836	6.41935	4.41041e-09	3.00999e-08	10.1808	Not-significant
SEL1L	0.432961	6.41604	4.47924e-09	3.05218e-08	10.1656	Not-significant
MDH1	0.406225	6.41431	4.5156e-09	3.07216e-08	10.1577	Not-significant
RPN2	-0.644004	-6.41198	4.56491e-09	3.10087e-08	10.1471	Not-significant
TMPRSS4	-0.330257	-6.41021	4.60279e-09	3.12174e-08	10.139	Not-significant
RIOK3	0.587928	6.40813	4.64778e-09	3.14735e-08	10.1295	Not-significant
CIB1	-0.563947	-6.40526	4.71046e-09	3.18485e-08	10.1164	Not-significant
BRIX1	-0.470067	-6.39648	4.90758e-09	3.31299e-08	10.0762	Not-significant
EIF3L	0.458438	6.3917	5.01829e-09	3.3825e-08	10.0544	Not-significant
HNRNPC	-0.503149	-6.38263	5.23514e-09	3.52322e-08	10.013	Not-significant
SRSF5	0.530339	6.37907	5.32262e-09	3.57657e-08	9.99673	Not-significant
BAD	0.724796	6.37702	5.3739e-09	3.60548e-08	9.98734	Not-significant
ATG7	0.400222	6.37309	5.47309e-09	3.66638e-08	9.96944	Not-significant
PPP1R13B	0.380527	6.36772	5.61181e-09	3.75354e-08	9.94493	Not-significant
TMEM168	-0.380781	-6.36388	5.71319e-09	3.8155e-08	9.92741	Not-significant
RNPEPL1	-0.505231	-6.3619	5.76608e-09	3.83987e-08	9.91839	Not-significant
RBPMS	-0.320137	-6.36185	5.76729e-09	3.83987e-08	9.91818	Not-significant
CTSA	-0.392689	-6.36071	5.79806e-09	3.85447e-08	9.91297	Not-significant
IL32	-0.541244	-6.35972	5.82483e-09	3.86209e-08	9.90846	Not-significant
ERBB3	0.521077	6.35963	5.82723e-09	3.86209e-08	9.90806	Not-significant
TBC1D5	0.327098	6.35809	5.86937e-09	3.88412e-08	9.90101	Not-significant
OASL	0.556748	6.35661	5.90973e-09	3.89998e-08	9.8943	Not-significant
NTS	0.332909	6.35656	5.91123e-09	3.89998e-08	9.89405	Not-significant
TEAD3	-0.667173	-6.35512	5.95083e-09	3.92017e-08	9.88751	Not-significant
NFYC	0.495962	6.34934	6.1132e-09	4.02107e-08	9.86116	Not-significant
DCXR	1.03665	6.34866	6.13271e-09	4.02782e-08	9.85804	Up-regulated
ELF3	0.601457	6.34351	6.28125e-09	4.11918e-08	9.83462	Not-significant
TBL3	1.0405	6.34282	6.30164e-09	4.12635e-08	9.83145	Up-regulated
RYK	-0.468773	-6.33866	6.42476e-09	4.19675e-08	9.81251	Not-significant
ATP6V1F	-0.380148	-6.33853	6.42841e-09	4.19675e-08	9.81195	Not-significant
RAF1	0.374417	6.33598	6.50507e-09	4.23913e-08	9.80035	Not-significant
TGM2	0.315158	6.33573	6.51276e-09	4.23913e-08	9.79919	Not-significant
DAD1	0.385081	6.33189	6.62998e-09	4.30899e-08	9.78173	Not-significant
EHMT2	0.456497	6.32526	6.83767e-09	4.43736e-08	9.75155	Not-significant
H2AX	-0.543834	-6.317	7.10514e-09	4.60409e-08	9.71399	Not-significant
PRICKLE4	0.350624	6.31033	7.32833e-09	4.74167e-08	9.68373	Not-significant
RETSAT	0.831691	6.30977	7.34752e-09	4.74704e-08	9.68117	Not-significant
NCAPD2	0.663919	6.30478	7.51973e-09	4.84515e-08	9.6585	Not-significant
TRAPPC11	0.347664	6.30473	7.52159e-09	4.84515e-08	9.65825	Not-significant
POLR2G	-0.538509	-6.30056	7.66843e-09	4.93245e-08	9.63934	Not-significant
ELMO3	0.520313	6.2988	7.73132e-09	4.96558e-08	9.63134	Not-significant
TNK1	0.353535	6.29216	7.97322e-09	5.11341e-08	9.6012	Not-significant
CENPH	0.586538	6.28713	8.16129e-09	5.22634e-08	9.57838	Not-significant
COX4I1	0.455053	6.27988	8.44007e-09	5.39694e-08	9.54552	Not-significant
AHNAK	0.670337	6.2753	8.62098e-09	5.50455e-08	9.52477	Not-significant
GUK1	-0.431722	-6.27171	8.76584e-09	5.58886e-08	9.50847	Not-significant
CPNE7	1.0309	6.26976	8.84531e-09	5.6313e-08	9.49964	Up-regulated
ALDH3A2	0.468903	6.25255	9.57834e-09	6.08909e-08	9.42175	Not-significant
FBXO11	0.36427	6.24259	1.00298e-08	6.36681e-08	9.3767	Not-significant
EHBP1L1	0.443878	6.24107	1.01007e-08	6.4025e-08	9.36981	Not-significant
DYNC1I2	0.320171	6.24005	1.01482e-08	6.42327e-08	9.36522	Not-significant
SNRNP200	-0.371133	-6.23646	1.0318e-08	6.52126e-08	9.34899	Not-significant
RHOA	-0.372879	-6.23448	1.04128e-08	6.5717e-08	9.34004	Not-significant
MRM2	-0.557571	-6.22915	1.06726e-08	6.72592e-08	9.31594	Not-significant
DAZAP2	0.496492	6.22619	1.08196e-08	6.80867e-08	9.30256	Not-significant
BAIAP2L2	0.506473	6.22228	1.10165e-08	6.92259e-08	9.28493	Not-significant
MFSD1	-0.589418	-6.21377	1.14577e-08	7.18948e-08	9.24652	Not-significant
ITPKA	0.425591	6.21241	1.15299e-08	7.22439e-08	9.24038	Not-significant
ADRM1	-0.515363	-6.21044	1.16354e-08	7.28004e-08	9.23147	Not-significant
WDR13	0.48301	6.20983	1.16677e-08	7.28981e-08	9.22876	Not-significant
H3-3B	-0.384271	-6.20507	1.1927e-08	7.44115e-08	9.20726	Not-significant
CTBP2	0.472413	6.20222	1.20845e-08	7.52825e-08	9.19443	Not-significant
SUCLG1	0.507433	6.20192	1.21011e-08	7.52825e-08	9.19309	Not-significant
FBXW11	0.256245	6.20108	1.21482e-08	7.54675e-08	9.18929	Not-significant
ETFA	0.274349	6.19566	1.24559e-08	7.72691e-08	9.16483	Not-significant
MAN2C1	0.490647	6.19501	1.2493e-08	7.73889e-08	9.16192	Not-significant
TMEM59	0.480566	6.19333	1.25899e-08	7.7879e-08	9.15436	Not-significant
PFDN6	-0.53295	-6.18831	1.28845e-08	7.95882e-08	9.13175	Not-significant
DPY19L1	-0.607727	-6.18364	1.31646e-08	8.12032e-08	9.11072	Not-significant
PCDHGC5	-0.464737	-6.18119	1.33143e-08	8.20108e-08	9.09966	Not-significant
COQ7	0.372306	6.17969	1.34066e-08	8.24627e-08	9.09291	Not-significant
SLC22A18	-0.401496	-6.17505	1.3696e-08	8.41243e-08	9.07203	Not-significant
MIR22HG	0.496016	6.17379	1.37756e-08	8.44943e-08	9.06636	Not-significant
DNMBP	0.350478	6.17327	1.38086e-08	8.45778e-08	9.06402	Not-significant
PLOD3	-0.564425	-6.16602	1.42769e-08	8.73236e-08	9.03141	Not-significant
UBA1	-0.428737	-6.16384	1.44203e-08	8.8077e-08	9.02164	Not-significant
CYP4F12	0.469238	6.15288	1.51657e-08	9.25e-08	8.97237	Not-significant
NCL	-0.338514	-6.15157	1.52575e-08	9.29303e-08	8.96647	Not-significant
SEL1L3	0.284423	6.14867	1.54621e-08	9.4045e-08	8.95345	Not-significant
WDR12	-0.812734	-6.14579	1.5668e-08	9.50426e-08	8.94052	Not-significant
PTPN12	-0.592473	-6.14576	1.56697e-08	9.50426e-08	8.94041	Not-significant
SCAPER	-0.548622	-6.13748	1.62776e-08	9.85926e-08	8.90321	Not-significant
AP3D1	0.59397	6.12988	1.68549e-08	1.01947e-07	8.86915	Not-significant
XPOT	-0.432338	-6.12843	1.69673e-08	1.02485e-07	8.86265	Not-significant
PLK2	-0.452663	-6.12219	1.74602e-08	1.05317e-07	8.83466	Not-significant
LOC728743	0.498744	6.11935	1.76889e-08	1.06549e-07	8.82194	Not-significant
ARL5B	-0.41924	-6.11133	1.83511e-08	1.10385e-07	8.78602	Not-significant
PRDM4	-0.544623	-6.10986	1.84755e-08	1.1098e-07	8.77942	Not-significant
ELL2	0.652678	6.10567	1.88335e-08	1.12975e-07	8.76066	Not-significant
CBFB	-1.0584	-6.10011	1.93193e-08	1.1573e-07	8.73578	Down-regulated
SPINK1	1.15992	6.09856	1.94565e-08	1.16392e-07	8.72886	Up-regulated
CDC37	-0.337099	-6.08873	2.03527e-08	1.21586e-07	8.68486	Not-significant
OSBP	0.336777	6.0838	2.08165e-08	1.24187e-07	8.66284	Not-significant
DMAC2	0.461466	6.07214	2.19564e-08	1.30808e-07	8.61075	Not-significant
HIF1A	-0.445339	-6.06822	2.23532e-08	1.32991e-07	8.59325	Not-significant
PMPCA	-0.436256	-6.06265	2.29295e-08	1.36234e-07	8.56838	Not-significant
OLFM4	-1.84181	-6.0562	2.36144e-08	1.40112e-07	8.53962	Down-regulated
CALCOCO1	0.523397	6.05506	2.3738e-08	1.40654e-07	8.53453	Not-significant
PBX2	-0.633421	-6.05396	2.38575e-08	1.4117e-07	8.52962	Not-significant
S100A4	-0.523916	-6.05345	2.39133e-08	1.41309e-07	8.52734	Not-significant
DRAP1	0.285729	6.04739	2.45833e-08	1.45071e-07	8.50034	Not-significant
DDOST	-0.430059	-6.04439	2.49219e-08	1.46871e-07	8.48698	Not-significant
PHF19	-0.447015	-6.04109	2.53006e-08	1.48901e-07	8.47225	Not-significant
TMTC4	0.364525	6.0401	2.54143e-08	1.49369e-07	8.46787	Not-significant
PPP2R5A	0.42677	6.03475	2.60419e-08	1.52852e-07	8.44404	Not-significant
SLC36A1	1.09214	6.03101	2.64901e-08	1.55273e-07	8.42737	Up-regulated
TP53I11	-0.951582	-6.02239	2.75511e-08	1.61276e-07	8.38902	Down-regulated
NUP43	0.711008	6.02154	2.76577e-08	1.61683e-07	8.38524	Not-significant
UBE2J2	-0.532106	-6.0176	2.81582e-08	1.64388e-07	8.36773	Not-significant
NECAP2	0.359889	6.00393	2.9965e-08	1.74702e-07	8.30699	Not-significant
GTSE1	0.538878	6.00196	3.02358e-08	1.76046e-07	8.29821	Not-significant
BPTF	0.486594	5.98061	3.33154e-08	1.93718e-07	8.2035	Not-significant
SCMH1	0.526083	5.98024	3.33715e-08	1.93786e-07	8.20186	Not-significant
UBE3C	0.388347	5.9708	3.48322e-08	2.01999e-07	8.16003	Not-significant
MAGI1	0.539643	5.97004	3.49527e-08	2.02428e-07	8.15666	Not-significant
MED7	-0.560605	-5.96623	3.55618e-08	2.05683e-07	8.13979	Not-significant
CXCL2	-1.08227	-5.9649	3.57777e-08	2.06658e-07	8.13388	Down-regulated
NUDT21	0.719589	5.96157	3.63212e-08	2.0952e-07	8.11916	Not-significant
TCEAL1	0.395855	5.95942	3.66781e-08	2.11299e-07	8.10962	Not-significant
ALDH6A1	0.661383	5.95677	3.7121e-08	2.13568e-07	8.0979	Not-significant
UMAD1	0.333827	5.95453	3.75001e-08	2.15465e-07	8.08798	Not-significant
COX11	0.253515	5.95307	3.77479e-08	2.16603e-07	8.08155	Not-significant
ALDH18A1	0.331231	5.9513	3.80518e-08	2.1806e-07	8.07372	Not-significant
PSMD7	-0.547662	-5.94151	3.97776e-08	2.27651e-07	8.03043	Not-significant
TIMM10	-0.618716	-5.93951	4.01401e-08	2.29424e-07	8.02157	Not-significant
MRPS21	0.419172	5.93767	4.04751e-08	2.31036e-07	8.01346	Not-significant
PPP3R1	0.429838	5.93538	4.08966e-08	2.33137e-07	8.00335	Not-significant
GALNT10	0.481882	5.93207	4.15152e-08	2.36355e-07	7.9887	Not-significant
SELENOW	-0.44029	-5.93135	4.16504e-08	2.36815e-07	7.98552	Not-significant
NMUR2	0.675422	5.93087	4.17412e-08	2.37023e-07	7.9834	Not-significant
EIF4A2	0.591073	5.9285	4.21898e-08	2.39256e-07	7.97296	Not-significant
SMAP1	0.261195	5.92822	4.22442e-08	2.39256e-07	7.97171	Not-significant
VCP	-0.479153	-5.92604	4.26625e-08	2.41312e-07	7.96209	Not-significant
AATF	-0.538502	-5.91998	4.38467e-08	2.47689e-07	7.93537	Not-significant
RPS6KC1	0.381734	5.91952	4.39383e-08	2.47885e-07	7.93333	Not-significant
STIP1	-0.434424	-5.91686	4.44702e-08	2.50562e-07	7.92159	Not-significant
TIMM50	-0.438986	-5.91331	4.51891e-08	2.54283e-07	7.90594	Not-significant
MYLIP	0.298324	5.91127	4.56078e-08	2.56278e-07	7.89694	Not-significant
ANXA4	-0.553905	-5.91101	4.56611e-08	2.56278e-07	7.8958	Not-significant
KIAA1191	0.665842	5.90296	4.73523e-08	2.65428e-07	7.86031	Not-significant
MACROH2A1	-0.732039	-5.89973	4.80465e-08	2.68974e-07	7.84611	Not-significant
RITA1	0.544464	5.88787	5.06875e-08	2.83066e-07	7.7939	Not-significant
PSMC2	-0.628354	-5.88785	5.06935e-08	2.83066e-07	7.79378	Not-significant
HEBP1	0.789572	5.88067	5.23599e-08	2.91997e-07	7.76222	Not-significant
NAT14	0.364819	5.87908	5.27368e-08	2.93723e-07	7.75523	Not-significant
CLN6	-0.527469	-5.878	5.29951e-08	2.94785e-07	7.75046	Not-significant
VPS37B	-0.501781	-5.87684	5.32721e-08	2.95949e-07	7.74537	Not-significant
CCDC85C	0.329513	5.8734	5.41051e-08	3.00194e-07	7.73024	Not-significant
ERAP1	0.336422	5.87122	5.46392e-08	3.02772e-07	7.72065	Not-significant
SLTM	0.298864	5.85858	5.78376e-08	3.20059e-07	7.66516	Not-significant
DNAJC4	0.406929	5.85832	5.79057e-08	3.20059e-07	7.66401	Not-significant
MRPL11	-0.6148	-5.85518	5.87304e-08	3.24207e-07	7.65022	Not-significant
MARCKS	0.482244	5.85403	5.90357e-08	3.25382e-07	7.64516	Not-significant
MCFD2	0.367539	5.85381	5.90926e-08	3.25382e-07	7.64422	Not-significant
TEKT4P2	0.311502	5.84384	6.18023e-08	3.39874e-07	7.60049	Not-significant
WBP1L	0.310971	5.8386	6.32762e-08	3.47541e-07	7.5775	Not-significant
TMEM107	0.611813	5.83658	6.38509e-08	3.50256e-07	7.56868	Not-significant
BEST1	-0.520241	-5.83445	6.44661e-08	3.53187e-07	7.55933	Not-significant
TP53RK	0.349653	5.83391	6.46221e-08	3.53597e-07	7.55697	Not-significant
PPCS	0.306234	5.83307	6.48675e-08	3.54495e-07	7.55328	Not-significant
KIF13B	0.615172	5.82631	6.68648e-08	3.64953e-07	7.5237	Not-significant
RPS6KA4	-0.419508	-5.81538	7.02253e-08	3.82816e-07	7.47588	Not-significant
MFGE8	-0.578733	-5.81464	7.04596e-08	3.83613e-07	7.47264	Not-significant
GLRX3	-0.507927	-5.81285	7.10283e-08	3.86227e-07	7.4648	Not-significant
ZNF232	0.407145	5.80899	7.2268e-08	3.92479e-07	7.44793	Not-significant
RTCB	0.29531	5.80346	7.40811e-08	4.01826e-07	7.42376	Not-significant
ZDHHC23	0.279285	5.80268	7.43399e-08	4.02728e-07	7.42036	Not-significant
LRIG1	0.923919	5.79833	7.58025e-08	4.10142e-07	7.40137	Up-regulated
SEPTIN7	-0.661679	-5.79582	7.66586e-08	4.14251e-07	7.39042	Not-significant
PTK2B	0.781813	5.79555	7.67518e-08	4.14251e-07	7.38923	Not-significant
NDUFA1	0.380201	5.7821	8.15144e-08	4.39412e-07	7.33054	Not-significant
LAMTOR1	0.402429	5.77166	8.54113e-08	4.5985e-07	7.28502	Not-significant
TMEM18	0.318	5.7667	8.73236e-08	4.69566e-07	7.26343	Not-significant
VDAC3	-0.415913	-5.76458	8.81541e-08	4.73449e-07	7.25421	Not-significant
ST14	-0.622308	-5.7623	8.90576e-08	4.77712e-07	7.24427	Not-significant
SRSF3	-0.373541	-5.76197	8.919e-08	4.77835e-07	7.24282	Not-significant
GOLGA3	-0.645238	-5.76101	8.95722e-08	4.79293e-07	7.23865	Not-significant
NDUFC1	0.32903	5.75337	9.26802e-08	4.95317e-07	7.20541	Not-significant
UAP1	0.566347	5.74732	9.52173e-08	5.08253e-07	7.17909	Not-significant
UBE2V1	-0.401597	-5.74423	9.65386e-08	5.14676e-07	7.16566	Not-significant
CEACAM6	-0.842789	-5.74238	9.73403e-08	5.18316e-07	7.1576	Not-significant
TRIM29	-0.431091	-5.73557	1.0034e-07	5.33335e-07	7.12802	Not-significant
RAB11B	0.278327	5.73542	1.00405e-07	5.33335e-07	7.12738	Not-significant
ZER1	0.319882	5.73223	1.01843e-07	5.40315e-07	7.11353	Not-significant
DNAJC11	-0.394548	-5.72363	1.05819e-07	5.60726e-07	7.07621	Not-significant
RPS6KA2	0.326099	5.71994	1.07575e-07	5.69339e-07	7.06018	Not-significant
OGT	0.452687	5.7191	1.07975e-07	5.70761e-07	7.05656	Not-significant
SLC7A2	0.331736	5.71683	1.09071e-07	5.75559e-07	7.04672	Not-significant
BCL2L1	-0.582178	-5.71668	1.09146e-07	5.75559e-07	7.04605	Not-significant
ENAH	-0.457555	-5.71397	1.1047e-07	5.81833e-07	7.03431	Not-significant
RABGAP1	0.302835	5.71124	1.11818e-07	5.88223e-07	7.02249	Not-significant
HGD	0.814534	5.70762	1.13633e-07	5.97054e-07	7.0068	Not-significant
IGBP1	0.380987	5.70575	1.14585e-07	6.01328e-07	6.99868	Not-significant
RHOD	-0.333815	-5.70221	1.16399e-07	6.10116e-07	6.98337	Not-significant
LMAN1	0.263138	5.70161	1.1671e-07	6.11009e-07	6.98077	Not-significant
PPCDC	0.551554	5.70006	1.17516e-07	6.14494e-07	6.97406	Not-significant
OSGIN2	-0.434189	-5.69893	1.1811e-07	6.16858e-07	6.96916	Not-significant
PGAM1	-0.446643	-5.69585	1.19735e-07	6.24601e-07	6.95584	Not-significant
KLHDC10	0.349122	5.69338	1.21059e-07	6.30751e-07	6.94513	Not-significant
TCTN1	0.312039	5.68722	1.24413e-07	6.47454e-07	6.91851	Not-significant
DCTN1	0.29329	5.68548	1.25378e-07	6.51697e-07	6.91098	Not-significant
ATAD3B	-0.610614	-5.6847	1.25812e-07	6.53176e-07	6.90761	Not-significant
UQCR10	0.350715	5.68327	1.26615e-07	6.5656e-07	6.90142	Not-significant
TFR2	-0.400311	-5.68281	1.26876e-07	6.57136e-07	6.89941	Not-significant
PDE8A	0.498301	5.67912	1.28968e-07	6.67176e-07	6.88349	Not-significant
PDLIM7	0.298463	5.67787	1.29687e-07	6.69634e-07	6.87807	Not-significant
ATP6AP2	2.62397	5.67776	1.2975e-07	6.69634e-07	6.87759	Up-regulated
EFNA1	-0.749318	-5.67646	1.30501e-07	6.72714e-07	6.87197	Not-significant
TSPAN4	0.427412	5.6655	1.36997e-07	7.0417e-07	6.82467	Not-significant
NEAT1	0.416874	5.66544	1.37032e-07	7.0417e-07	6.82441	Not-significant
TOMM34	-0.593623	-5.66535	1.37088e-07	7.0417e-07	6.82402	Not-significant
EIF3I	-0.387617	-5.66364	1.38134e-07	7.08707e-07	6.81662	Not-significant
ALDH7A1	0.341507	5.6598	1.40504e-07	7.20021e-07	6.80005	Not-significant
PLEKHG1	0.29216	5.65489	1.43587e-07	7.34959e-07	6.77891	Not-significant
RHOT2	0.736603	5.65344	1.44514e-07	7.38834e-07	6.77264	Not-significant
C18orf32	0.303201	5.64276	1.51507e-07	7.72943e-07	6.72663	Not-significant
SUMO2	-0.368862	-5.64271	1.5154e-07	7.72943e-07	6.72642	Not-significant
EIF3H	-0.371905	-5.64183	1.52137e-07	7.7508e-07	6.72259	Not-significant
INPP4B	0.526667	5.64032	1.53152e-07	7.79342e-07	6.71611	Not-significant
RPN1	-0.371976	-5.63676	1.55585e-07	7.90802e-07	6.70077	Not-significant
FAT1	-0.487549	-5.63369	1.57711e-07	8.00673e-07	6.68755	Not-significant
HSD17B1	-0.378574	-5.62979	1.60452e-07	8.13641e-07	6.67078	Not-significant
SF3B3	-0.340867	-5.62858	1.61307e-07	8.17028e-07	6.6656	Not-significant
URB1	-0.264282	-5.62466	1.64127e-07	8.29893e-07	6.64873	Not-significant
TESC	0.339211	5.62452	1.64228e-07	8.29893e-07	6.64813	Not-significant
BOK	1.04157	5.6209	1.66874e-07	8.4229e-07	6.63257	Up-regulated
C1orf21	-0.544549	-5.61785	1.69135e-07	8.52716e-07	6.61947	Not-significant
LPCAT3	0.457942	5.61701	1.69768e-07	8.54915e-07	6.61584	Not-significant
CEMIP	-0.420328	-5.61652	1.70132e-07	8.55761e-07	6.61375	Not-significant
ATF4	0.405343	5.61402	1.72018e-07	8.64252e-07	6.60302	Not-significant
PHKA2	-0.301742	-5.61015	1.74986e-07	8.78151e-07	6.58637	Not-significant
RPL8	-0.366742	-5.60851	1.76256e-07	8.83509e-07	6.57933	Not-significant
PPP2R1B	0.393137	5.60783	1.7678e-07	8.85119e-07	6.57644	Not-significant
PDAP1	-0.509584	-5.60679	1.77595e-07	8.88178e-07	6.57196	Not-significant
FLNA	0.383193	5.60563	1.78505e-07	8.91707e-07	6.56698	Not-significant
CIAO2B	-0.32947	-5.60304	1.80559e-07	8.99909e-07	6.55585	Not-significant
SERPINA3	-1.02932	-5.60304	1.8056e-07	8.99909e-07	6.55585	Down-regulated
SUMO1	-0.399789	-5.60231	1.81141e-07	9.01778e-07	6.55272	Not-significant
SIAH1	0.59844	5.60154	1.81758e-07	9.03814e-07	6.54941	Not-significant
SAP30BP	0.276756	5.59045	1.90857e-07	9.47979e-07	6.50187	Not-significant
HIP1R	0.72144	5.58946	1.9169e-07	9.51037e-07	6.49762	Not-significant
CDCA8	-1.29076	-5.58465	1.9579e-07	9.70273e-07	6.47703	Down-regulated
SHROOM3	0.57911	5.58069	1.99234e-07	9.86219e-07	6.46006	Not-significant
PYGB	-0.526203	-5.57893	2.00783e-07	9.92763e-07	6.45252	Not-significant
TUBB4B	-0.33666	-5.57751	2.02044e-07	9.97864e-07	6.44643	Not-significant
NCDN	-0.422262	-5.57687	2.02608e-07	9.99515e-07	6.44372	Not-significant
TSPAN3	-0.684833	-5.57614	2.0326e-07	1.0016e-06	6.44059	Not-significant
ZCRB1	0.312044	5.57381	2.05356e-07	1.01079e-06	6.43061	Not-significant
ACOX3	0.533309	5.57232	2.06702e-07	1.01627e-06	6.42425	Not-significant
CAV1	0.320664	5.56798	2.10684e-07	1.03468e-06	6.40568	Not-significant
CSNK2A1	-0.35874	-5.56745	2.1118e-07	1.03595e-06	6.4034	Not-significant
GLS	0.285767	5.56672	2.1186e-07	1.03811e-06	6.40027	Not-significant
JUP	-0.915682	-5.56506	2.1341e-07	1.04454e-06	6.39318	Down-regulated
MYBL2	-0.519096	-5.56434	2.14081e-07	1.04665e-06	6.39012	Not-significant
KPNA6	0.600417	5.56379	2.14603e-07	1.04802e-06	6.38775	Not-significant
ANKLE2	-0.332739	-5.55872	2.19438e-07	1.07044e-06	6.36607	Not-significant
NDUFV1	0.319074	5.54973	2.28273e-07	1.11175e-06	6.32767	Not-significant
NOSTRIN	0.372876	5.54958	2.28417e-07	1.11175e-06	6.32706	Not-significant
DDX60L	0.503541	5.54025	2.37965e-07	1.15693e-06	6.28722	Not-significant
FBLN1	1.09004	5.53737	2.40983e-07	1.1703e-06	6.27496	Up-regulated
ERBIN	0.528024	5.53564	2.4282e-07	1.17791e-06	6.26757	Not-significant
REG3A	2.01377	5.53377	2.44816e-07	1.18627e-06	6.25961	Up-regulated
SLC25A17	0.241564	5.53307	2.45573e-07	1.18862e-06	6.2566	Not-significant
NBPF1	0.523208	5.53248	2.46208e-07	1.19037e-06	6.25409	Not-significant
SMARCAL1	0.228071	5.52994	2.48968e-07	1.20238e-06	6.24325	Not-significant
PTBP1	-0.368587	-5.52715	2.52025e-07	1.2158e-06	6.23138	Not-significant
SERPINH1	0.640896	5.52295	2.56702e-07	1.23699e-06	6.2135	Not-significant
CYB5D2	0.421167	5.52267	2.57014e-07	1.23713e-06	6.21231	Not-significant
RFK	0.302861	5.5213	2.5857e-07	1.24324e-06	6.20645	Not-significant
COPB2	-0.444904	-5.51932	2.60817e-07	1.25267e-06	6.19803	Not-significant
ATP2A2	0.486098	5.51565	2.65038e-07	1.27154e-06	6.18241	Not-significant
PLOD1	-0.837462	-5.51282	2.68339e-07	1.28596e-06	6.17038	Not-significant
AGFG1	-0.471873	-5.50743	2.74737e-07	1.31518e-06	6.14746	Not-significant
SRP19	0.320977	5.5049	2.77798e-07	1.32837e-06	6.13669	Not-significant
NGLY1	0.289074	5.50222	2.81067e-07	1.34253e-06	6.12531	Not-significant
NDUFS7	0.372382	5.50089	2.82702e-07	1.34887e-06	6.11967	Not-significant
SMARCD3	0.517708	5.49075	2.95514e-07	1.40845e-06	6.07657	Not-significant
ATXN7L3	-0.634162	-5.48707	3.00302e-07	1.42971e-06	6.06095	Not-significant
KEAP1	-0.323357	-5.48659	3.00921e-07	1.4311e-06	6.05894	Not-significant
PLCG2	0.718508	5.48561	3.02212e-07	1.43567e-06	6.05478	Not-significant
RXRA	0.356811	5.48365	3.04818e-07	1.44647e-06	6.04643	Not-significant
THYN1	0.390613	5.48018	3.09464e-07	1.46693e-06	6.03172	Not-significant
LMO4	0.416763	5.47201	3.20677e-07	1.51843e-06	5.99712	Not-significant
PI3	-1.30203	-5.46723	3.27439e-07	1.54877e-06	5.97684	Down-regulated
IRF2BPL	0.479082	5.46256	3.34159e-07	1.57884e-06	5.95709	Not-significant
CCL19	0.452329	5.46213	3.34781e-07	1.58006e-06	5.95528	Not-significant
EEF2	0.339197	5.45304	3.48308e-07	1.64213e-06	5.91678	Not-significant
SREBF2	0.685412	5.4517	3.50333e-07	1.6499e-06	5.91115	Not-significant
AXIN2	0.484963	5.44995	3.53017e-07	1.66071e-06	5.90373	Not-significant
CCT5	-0.500826	-5.44949	3.53718e-07	1.66071e-06	5.9018	Not-significant
OLA1	-0.394838	-5.44946	3.53771e-07	1.66071e-06	5.90165	Not-significant
TMEM234	0.88779	5.44604	3.59069e-07	1.68376e-06	5.88721	Not-significant
STAT1	-0.503903	-5.43964	3.69207e-07	1.72944e-06	5.86015	Not-significant
NMT2	-0.412455	-5.43739	3.72835e-07	1.74457e-06	5.85064	Not-significant
TMEM263	0.417119	5.43459	3.77388e-07	1.76397e-06	5.83885	Not-significant
RUVBL2	-0.554263	-5.43142	3.8263e-07	1.78656e-06	5.82544	Not-significant
DNAJC10	0.305222	5.43116	3.83061e-07	1.78666e-06	5.82435	Not-significant
GUCD1	0.400786	5.43086	3.83553e-07	1.78705e-06	5.8231	Not-significant
RAB3IL1	-0.502616	-5.42955	3.85737e-07	1.7953e-06	5.81759	Not-significant
PSMB7	-0.38882	-5.42726	3.896e-07	1.81135e-06	5.8079	Not-significant
MARF1	0.469044	5.41928	4.03325e-07	1.87316e-06	5.77426	Not-significant
SYNJ2	0.291882	5.41779	4.05945e-07	1.88332e-06	5.76797	Not-significant
COQ8A	0.700464	5.41611	4.08905e-07	1.89504e-06	5.76091	Not-significant
TMEM143	0.265469	5.40852	4.22595e-07	1.95641e-06	5.72892	Not-significant
KIAA1522	0.424634	5.40793	4.23669e-07	1.9593e-06	5.72645	Not-significant
RGL2	0.305096	5.40618	4.26894e-07	1.97213e-06	5.71908	Not-significant
NPTN	-0.353713	-5.40371	4.31495e-07	1.99127e-06	5.70867	Not-significant
AIMP2	-0.272857	-5.39814	4.4202e-07	2.03769e-06	5.68526	Not-significant
SSBP1	-0.411928	-5.39541	4.47273e-07	2.05972e-06	5.67378	Not-significant
PEF1	0.817044	5.39408	4.49861e-07	2.06946e-06	5.66818	Not-significant
CNOT8	0.276899	5.39095	4.55984e-07	2.09541e-06	5.65504	Not-significant
GAR1	-0.421635	-5.38773	4.62388e-07	2.1226e-06	5.6415	Not-significant
ACSS2	0.657276	5.38476	4.68357e-07	2.14774e-06	5.62904	Not-significant
ACTG1	-0.400674	-5.38433	4.69246e-07	2.14901e-06	5.6272	Not-significant
CSTB	-0.724199	-5.38414	4.69619e-07	2.14901e-06	5.62642	Not-significant
LEPROT	0.486739	5.38013	4.77836e-07	2.18432e-06	5.60958	Not-significant
UBE3B	0.931784	5.37953	4.79083e-07	2.18773e-06	5.60705	Up-regulated
KRT18	0.302422	5.37693	4.84481e-07	2.21007e-06	5.59616	Not-significant
TBRG1	0.353575	5.37048	4.98186e-07	2.27021e-06	5.56907	Not-significant
FBXO9	0.781276	5.3693	5.00722e-07	2.27938e-06	5.56414	Not-significant
CAND1	-0.741008	-5.36732	5.0503e-07	2.2966e-06	5.55582	Not-significant
GOSR2	0.363121	5.36624	5.07377e-07	2.30487e-06	5.55132	Not-significant
AREL1	0.242455	5.36496	5.10187e-07	2.31522e-06	5.54596	Not-significant
C17orf58	0.276003	5.36295	5.14647e-07	2.33303e-06	5.5375	Not-significant
LTBP3	-0.346818	-5.36109	5.18795e-07	2.34939e-06	5.52971	Not-significant
SPRYD7	0.342287	5.36009	5.21019e-07	2.35702e-06	5.52555	Not-significant
LY6D	-0.936329	-5.35889	5.23725e-07	2.3668e-06	5.52053	Down-regulated
TDP2	0.327475	5.35379	5.35371e-07	2.41693e-06	5.49917	Not-significant
TMEM14C	0.403124	5.34023	5.67604e-07	2.55979e-06	5.44241	Not-significant
SLC12A7	-0.399198	-5.33583	5.7846e-07	2.60606e-06	5.42401	Not-significant
UBXN1	0.222132	5.33304	5.85449e-07	2.63482e-06	5.41235	Not-significant
SLC12A2	0.622656	5.33275	5.86159e-07	2.6353e-06	5.41118	Not-significant
CDK2AP1	-0.34443	-5.32992	5.93341e-07	2.66279e-06	5.39936	Not-significant
PPP1R12C	-0.494425	-5.32986	5.93494e-07	2.66279e-06	5.3991	Not-significant
PTTG1IP	0.525613	5.32849	5.97023e-07	2.67586e-06	5.39335	Not-significant
CFAP119	0.427753	5.32742	5.99771e-07	2.68542e-06	5.38889	Not-significant
GOLT1B	-0.462313	-5.3182	6.24024e-07	2.79115e-06	5.35041	Not-significant
MYC	-0.423223	-5.31753	6.25828e-07	2.79635e-06	5.34761	Not-significant
LRP6	0.517031	5.31606	6.29795e-07	2.81119e-06	5.34148	Not-significant
AXIN1	-0.365735	-5.31081	6.44136e-07	2.87227e-06	5.31963	Not-significant
USB1	0.384791	5.30968	6.47269e-07	2.88329e-06	5.31492	Not-significant
ZNF76	0.354279	5.30856	6.50388e-07	2.89423e-06	5.31025	Not-significant
YPEL3	0.674611	5.30541	6.59247e-07	2.92801e-06	5.29712	Not-significant
TMEM156	0.331036	5.30539	6.59323e-07	2.92801e-06	5.29701	Not-significant
ERCC3	0.505707	5.30441	6.62082e-07	2.93727e-06	5.29296	Not-significant
ANXA1	-0.463443	-5.30288	6.66452e-07	2.95366e-06	5.28657	Not-significant
HAUS7	-0.399808	-5.29727	6.8268e-07	3.0225e-06	5.26323	Not-significant
MED23	0.305168	5.29597	6.86513e-07	3.03639e-06	5.25779	Not-significant
ZFP64	0.266485	5.29481	6.89932e-07	3.04842e-06	5.25297	Not-significant
SCNM1	-0.463097	-5.29214	6.9788e-07	3.08042e-06	5.24186	Not-significant
IFRD2	0.600027	5.27935	7.37181e-07	3.2506e-06	5.1887	Not-significant
UQCRC2	0.40692	5.27423	7.53524e-07	3.31931e-06	5.16743	Not-significant
ARAF	-0.296345	-5.27301	7.57451e-07	3.33324e-06	5.16238	Not-significant
ZNF219	0.957488	5.27267	7.58549e-07	3.3339e-06	5.16098	Up-regulated
MITF	-0.379724	-5.27249	7.5913e-07	3.3339e-06	5.16024	Not-significant
COX16	0.264275	5.27047	7.65744e-07	3.35957e-06	5.15182	Not-significant
MINDY1	0.399334	5.26703	7.77083e-07	3.40589e-06	5.13756	Not-significant
ASCC2	0.45329	5.266	7.80505e-07	3.41745e-06	5.1333	Not-significant
CAP1	-0.380038	-5.26441	7.85846e-07	3.43739e-06	5.12668	Not-significant
FKBP11	0.325169	5.25709	8.10789e-07	3.5414e-06	5.09637	Not-significant
AHSA1	-0.319947	-5.25696	8.11249e-07	3.5414e-06	5.09582	Not-significant
PNPT1	0.669025	5.2517	8.29702e-07	3.61833e-06	5.07401	Not-significant
ELAC1	0.274653	5.24962	8.37098e-07	3.64694e-06	5.0654	Not-significant
ISCU	0.379252	5.24903	8.39208e-07	3.65248e-06	5.06296	Not-significant
SLC2A4RG	-0.537928	-5.24506	8.53521e-07	3.70912e-06	5.04655	Not-significant
ID1	-0.482844	-5.24476	8.54626e-07	3.70912e-06	5.0453	Not-significant
PREB	0.336067	5.24472	8.54774e-07	3.70912e-06	5.04513	Not-significant
FBXL5	0.334856	5.23604	8.86999e-07	3.84513e-06	5.00924	Not-significant
NAA20	-0.421502	-5.22568	9.27047e-07	4.01475e-06	4.96642	Not-significant
KLF11	0.29828	5.22113	9.45187e-07	4.08667e-06	4.94763	Not-significant
CXADR	-0.747446	-5.22104	9.45529e-07	4.08667e-06	4.94728	Not-significant
APLN	0.22281	5.21052	9.88822e-07	4.26956e-06	4.90388	Not-significant
GTF2A1	0.445709	5.20756	1.00134e-06	4.31932e-06	4.89168	Not-significant
ANKRD10	-0.54935	-5.20407	1.01634e-06	4.3797e-06	4.87726	Not-significant
GPNMB	-0.673827	-5.2026	1.0227e-06	4.4e-06	4.87122	Not-significant
NUP205	-0.38915	-5.20251	1.02307e-06	4.4e-06	4.87087	Not-significant
C1GALT1	0.239813	5.19803	1.04272e-06	4.48011e-06	4.85242	Not-significant
FUBP1	-0.542478	-5.19535	1.05469e-06	4.52706e-06	4.84136	Not-significant
POLE3	-0.685771	-5.1937	1.06209e-06	4.55435e-06	4.83458	Not-significant
LRRC27	0.261367	5.19105	1.07409e-06	4.60127e-06	4.8237	Not-significant
POLD2	-0.554222	-5.18959	1.08077e-06	4.62535e-06	4.81769	Not-significant
L3MBTL2	-0.248814	-5.18875	1.08465e-06	4.63743e-06	4.81421	Not-significant
TAP2	-0.389941	-5.1884	1.08625e-06	4.63969e-06	4.81279	Not-significant
SEH1L	0.970923	5.18621	1.09637e-06	4.67837e-06	4.80379	Up-regulated
RERE	0.336037	5.17943	1.1284e-06	4.81031e-06	4.77589	Not-significant
LOC646214	-0.352542	-5.17849	1.13288e-06	4.82471e-06	4.77205	Not-significant
TPM1	0.543748	5.17702	1.13997e-06	4.84725e-06	4.766	Not-significant
CDCA3	0.25574	5.17693	1.1404e-06	4.84725e-06	4.76564	Not-significant
TOR3A	-0.395905	-5.17663	1.14186e-06	4.84872e-06	4.7644	Not-significant
GAMT	0.515769	5.17476	1.15093e-06	4.88252e-06	4.75672	Not-significant
GPKOW	0.282601	5.17384	1.15544e-06	4.89685e-06	4.75294	Not-significant
IDI1	0.51866	5.17308	1.15917e-06	4.90791e-06	4.74981	Not-significant
POLR2D	-0.357201	-5.16897	1.17954e-06	4.98931e-06	4.73293	Not-significant
BACE2	0.380144	5.16337	1.20783e-06	5.10403e-06	4.70997	Not-significant
PIGT	-0.516622	-5.16041	1.22304e-06	5.16329e-06	4.69784	Not-significant
TEX264	0.329229	5.15684	1.24168e-06	5.2369e-06	4.68319	Not-significant
ZNF133	0.309598	5.15059	1.27492e-06	5.37191e-06	4.65759	Not-significant
TSPAN33	0.274132	5.14897	1.28368e-06	5.4036e-06	4.65096	Not-significant
PSMD13	-0.367484	-5.14475	1.30676e-06	5.49544e-06	4.6337	Not-significant
METTL9	0.740852	5.1409	1.32818e-06	5.58014e-06	4.61795	Not-significant
SH3BGRL	0.321867	5.13787	1.34531e-06	5.64668e-06	4.60553	Not-significant
KRT80	-0.352627	-5.13357	1.3699e-06	5.74434e-06	4.58799	Not-significant
RPL15	0.277147	5.13078	1.38615e-06	5.80691e-06	4.57657	Not-significant
PPIE	-0.549888	-5.11789	1.46355e-06	6.1222e-06	4.52394	Not-significant
AMD1	0.330516	5.11778	1.46422e-06	6.1222e-06	4.5235	Not-significant
SNX12	0.253802	5.11752	1.46581e-06	6.123e-06	4.52244	Not-significant
ATP6V0D1	0.331158	5.11065	1.50885e-06	6.29673e-06	4.49442	Not-significant
XRN2	-0.768942	-5.11042	1.51036e-06	6.297e-06	4.49346	Not-significant
EIF4G1	-0.358483	-5.10832	1.52376e-06	6.34682e-06	4.4849	Not-significant
WAC	0.28331	5.10593	1.53917e-06	6.4049e-06	4.47515	Not-significant
YWHAZ	-0.475447	-5.10464	1.54751e-06	6.43344e-06	4.46993	Not-significant
RACK1	-0.35285	-5.09833	1.58913e-06	6.60018e-06	4.44423	Not-significant
RPL39L	-0.335664	-5.09651	1.60134e-06	6.64459e-06	4.43681	Not-significant
KDELR1	-0.28136	-5.09438	1.61572e-06	6.69786e-06	4.42816	Not-significant
MBTPS1	0.280652	5.09061	1.64156e-06	6.79854e-06	4.4128	Not-significant
CTDNEP1	0.22638	5.08953	1.64904e-06	6.82301e-06	4.4084	Not-significant
REPIN1	-0.347237	-5.08783	1.6608e-06	6.86108e-06	4.40152	Not-significant
PSMB3	-0.543318	-5.08775	1.66139e-06	6.86108e-06	4.40118	Not-significant
RALGPS1	0.296299	5.08699	1.66672e-06	6.8766e-06	4.39808	Not-significant
MAST3	0.235504	5.08293	1.69532e-06	6.98799e-06	4.3816	Not-significant
CRYZL2P-SEC16B	0.317004	5.08051	1.71269e-06	7.04916e-06	4.37174	Not-significant
COQ4	0.312799	5.08041	1.71339e-06	7.04916e-06	4.37134	Not-significant
FOXP4	0.493413	5.07956	1.71949e-06	7.06758e-06	4.3679	Not-significant
NELFB	0.222519	5.0783	1.72859e-06	7.0983e-06	4.36279	Not-significant
PACSIN2	0.2666	5.07745	1.73479e-06	7.11706e-06	4.35933	Not-significant
C11orf24	0.97799	5.07674	1.73999e-06	7.13167e-06	4.35643	Up-regulated
IL1R2	1.08379	5.07394	1.76051e-06	7.209e-06	4.34508	Up-regulated
TSPAN15	0.2647	5.07148	1.77877e-06	7.27696e-06	4.33509	Not-significant
LETMD1	0.314747	5.07119	1.78094e-06	7.27897e-06	4.33392	Not-significant
CALM1	-0.37368	-5.06733	1.80997e-06	7.39071e-06	4.31827	Not-significant
HMOX2	0.405696	5.06709	1.81181e-06	7.3913e-06	4.31728	Not-significant
RPS6KA3	0.242134	5.06463	1.83062e-06	7.46107e-06	4.30728	Not-significant
GAK	0.258553	5.06391	1.83609e-06	7.47636e-06	4.3044	Not-significant
SLC30A9	0.354937	5.06278	1.84487e-06	7.50511e-06	4.29978	Not-significant
MUC1	0.71359	5.06145	1.85516e-06	7.53992e-06	4.2944	Not-significant
PCK2	-0.701666	-5.06053	1.86227e-06	7.56177e-06	4.2907	Not-significant
ZBTB39	0.257491	5.0591	1.87349e-06	7.60026e-06	4.28489	Not-significant
PPT2-EGFL8	0.476344	5.05669	1.89249e-06	7.67022e-06	4.27512	Not-significant
AP2S1	-0.276728	-5.05542	1.90261e-06	7.70033e-06	4.26996	Not-significant
PIGR	1.16811	5.05531	1.90345e-06	7.70033e-06	4.26953	Up-regulated
SNRPB	-0.485675	-5.05479	1.90758e-06	7.70987e-06	4.26743	Not-significant
GGA2	0.316455	5.05312	1.92098e-06	7.75686e-06	4.26066	Not-significant
QSOX1	0.388976	5.04939	1.95117e-06	7.87148e-06	4.24557	Not-significant
CDA	0.271208	5.04663	1.97388e-06	7.95573e-06	4.23437	Not-significant
BMS1	-0.444546	-5.04474	1.98951e-06	8.0113e-06	4.22674	Not-significant
STOML2	-0.463593	-5.04438	1.99251e-06	8.01599e-06	4.22528	Not-significant
SCYL2	0.252748	5.04405	1.99525e-06	8.01962e-06	4.22395	Not-significant
PPM1J	-0.391791	-5.04114	2.01968e-06	8.11035e-06	4.21218	Not-significant
CFAP20	0.280366	5.03019	2.1142e-06	8.4821e-06	4.16793	Not-significant
SCAND1	-0.49318	-5.0297	2.11851e-06	8.49155e-06	4.16596	Not-significant
MRPS11	-0.350797	-5.02688	2.14359e-06	8.58355e-06	4.15457	Not-significant
ACSL3	0.657275	5.02668	2.14539e-06	8.58355e-06	4.15376	Not-significant
PPARD	0.25676	5.02624	2.1493e-06	8.59131e-06	4.152	Not-significant
SNU13	-0.303655	-5.02518	2.1589e-06	8.62178e-06	4.14769	Not-significant
TNK2	0.394501	5.02391	2.1703e-06	8.65935e-06	4.1426	Not-significant
MLLT6	0.272356	5.01831	2.22166e-06	8.85619e-06	4.11997	Not-significant
PIM2	0.844896	5.015	2.2525e-06	8.97092e-06	4.10664	Not-significant
HARS2	-0.330795	-5.00956	2.30409e-06	9.16799e-06	4.08474	Not-significant
CYP2S1	0.240996	5.00722	2.32672e-06	9.2496e-06	4.07528	Not-significant
ANXA7	-0.429533	-5.00527	2.34568e-06	9.3165e-06	4.06743	Not-significant
EIF6	-0.302973	-5.00464	2.35182e-06	9.33238e-06	4.06491	Not-significant
IGFBP4	-0.546936	-5.00439	2.35429e-06	9.33368e-06	4.06389	Not-significant
TRIB1	0.329407	5.00387	2.35941e-06	9.34549e-06	4.06179	Not-significant
GRK2	0.539095	5.00207	2.37707e-06	9.4069e-06	4.05458	Not-significant
TRIM26	0.218538	4.998	2.41776e-06	9.55924e-06	4.03817	Not-significant
PIK3C2A	0.391416	4.99566	2.44139e-06	9.64394e-06	4.02876	Not-significant
DDX56	-0.365121	-4.99505	2.44751e-06	9.65936e-06	4.02634	Not-significant
PRDX2	0.309583	4.99085	2.49065e-06	9.82071e-06	4.00945	Not-significant
THAP7	-0.581951	-4.97996	2.60591e-06	1.02659e-05	3.96571	Not-significant
GTF3C5	-0.461287	-4.97799	2.62733e-06	1.0341e-05	3.95779	Not-significant
CYB5B	-0.394061	-4.97752	2.63243e-06	1.03517e-05	3.95592	Not-significant
MRPL12	-0.343005	-4.97617	2.64723e-06	1.03976e-05	3.9505	Not-significant
CAPN15	-0.362087	-4.97602	2.64888e-06	1.03976e-05	3.9499	Not-significant
GCDH	0.542909	4.97364	2.67518e-06	1.04914e-05	3.94034	Not-significant
KIF22	-0.900856	-4.97333	2.67861e-06	1.04954e-05	3.93911	Down-regulated
UGT1A3	0.652993	4.96872	2.73038e-06	1.06887e-05	3.9206	Not-significant
SLC35A1	0.260027	4.96128	2.81585e-06	1.10134e-05	3.89081	Not-significant
SERINC1	0.327579	4.95917	2.8406e-06	1.11002e-05	3.88235	Not-significant
MALSU1	-0.340693	-4.95889	2.84391e-06	1.11032e-05	3.88123	Not-significant
TXN2	-0.378216	-4.95316	2.91217e-06	1.13595e-05	3.8583	Not-significant
RAC1	-0.320616	-4.95176	2.92913e-06	1.14155e-05	3.85269	Not-significant
KLF15	0.443186	4.94598	3.00008e-06	1.16815e-05	3.82956	Not-significant
FBLN2	0.54035	4.94519	3.00983e-06	1.17091e-05	3.82642	Not-significant
HSD3B7	-0.313052	-4.93886	3.08973e-06	1.20092e-05	3.80111	Not-significant
SLC35A2	-0.539645	-4.9298	3.20756e-06	1.24561e-05	3.76494	Not-significant
PHGDH	0.232553	4.92432	3.28089e-06	1.27295e-05	3.74311	Not-significant
SMARCA4	-0.39708	-4.92286	3.30066e-06	1.27948e-05	3.7373	Not-significant
KMT2D	-0.421154	-4.91796	3.3681e-06	1.30447e-05	3.71776	Not-significant
YIPF1	0.269067	4.91545	3.40309e-06	1.31685e-05	3.70778	Not-significant
KDM7A	0.400704	4.90578	3.54145e-06	1.36917e-05	3.66929	Not-significant
COX7A2	0.460624	4.90294	3.5832e-06	1.38409e-05	3.65797	Not-significant
MON1B	0.285222	4.9024	3.59117e-06	1.38594e-05	3.65582	Not-significant
DYNLRB1	-0.392426	-4.89466	3.70736e-06	1.42919e-05	3.62507	Not-significant
SLC48A1	0.337913	4.8945	3.7098e-06	1.42919e-05	3.62444	Not-significant
DNAJB11	-0.541798	-4.89178	3.75153e-06	1.44399e-05	3.61363	Not-significant
MAP3K20	-0.242454	-4.88905	3.79378e-06	1.45897e-05	3.60282	Not-significant
RBM5	0.416473	4.88875	3.79858e-06	1.45953e-05	3.6016	Not-significant
IL6ST	0.314541	4.88818	3.80747e-06	1.46165e-05	3.59934	Not-significant
SEPTIN2	-0.29013	-4.87364	4.04176e-06	1.55023e-05	3.54169	Not-significant
RAB4B	0.29144	4.87148	4.07762e-06	1.56261e-05	3.53316	Not-significant
SEC61G	-0.497145	-4.86844	4.12889e-06	1.58087e-05	3.5211	Not-significant
ENPP4	0.490829	4.8646	4.19431e-06	1.60451e-05	3.50592	Not-significant
TMEM67	0.378152	4.85703	4.32648e-06	1.65362e-05	3.47597	Not-significant
C3orf85	0.478688	4.85437	4.3739e-06	1.67028e-05	3.46545	Not-significant
CEP170B	0.588183	4.85415	4.37787e-06	1.67033e-05	3.46458	Not-significant
GNL2	-0.523675	-4.85145	4.42641e-06	1.68738e-05	3.45393	Not-significant
MOB4	0.413129	4.8504	4.44552e-06	1.69318e-05	3.44978	Not-significant
DNMT1	-0.525236	-4.8493	4.46554e-06	1.69932e-05	3.44544	Not-significant
DOP1B	-0.528093	-4.84871	4.47636e-06	1.70195e-05	3.44311	Not-significant
ZNF830	0.463622	4.84828	4.48436e-06	1.70351e-05	3.44138	Not-significant
UBL4A	0.485533	4.847	4.50781e-06	1.71093e-05	3.43635	Not-significant
ALAS1	0.314504	4.83789	4.6789e-06	1.77432e-05	3.4004	Not-significant
PDCD10	0.304644	4.83735	4.68919e-06	1.77668e-05	3.39828	Not-significant
SERP1	0.842558	4.83636	4.70824e-06	1.78235e-05	3.39437	Not-significant
TYK2	0.350376	4.83577	4.71955e-06	1.78508e-05	3.39205	Not-significant
PADI1	0.206458	4.82993	4.8336e-06	1.82663e-05	3.36902	Not-significant
CSNK2B	-0.382174	-4.82749	4.88186e-06	1.84327e-05	3.35943	Not-significant
MYBBP1A	-0.315195	-4.82637	4.90435e-06	1.85016e-05	3.35499	Not-significant
KLRC4	-0.316364	-4.82174	4.99783e-06	1.8838e-05	3.33678	Not-significant
SAFB2	0.621731	4.81741	5.08692e-06	1.91572e-05	3.31973	Not-significant
MRPL15	-0.353529	-4.81694	5.09656e-06	1.91769e-05	3.31791	Not-significant
RASSF7	0.326676	4.81621	5.11184e-06	1.92179e-05	3.31502	Not-significant
ATP6V1B2	-0.392796	-4.81592	5.11794e-06	1.92242e-05	3.31387	Not-significant
CPSF2	0.298589	4.81199	5.20058e-06	1.95179e-05	3.29842	Not-significant
CARM1	-0.31155	-4.81073	5.22715e-06	1.96007e-05	3.2935	Not-significant
COX10	0.609931	4.80994	5.24403e-06	1.96471e-05	3.29039	Not-significant
SRRT	-0.220561	-4.8092	5.25996e-06	1.96898e-05	3.28747	Not-significant
SPG11	0.274065	4.80652	5.31761e-06	1.98886e-05	3.27695	Not-significant
TRAF3IP2	0.207054	4.80527	5.34489e-06	1.99735e-05	3.27202	Not-significant
AARS1	0.252641	4.8048	5.35503e-06	1.99943e-05	3.27019	Not-significant
NNMT	0.182539	4.80188	5.419e-06	2.02158e-05	3.25874	Not-significant
OIP5	0.432589	4.79658	5.53727e-06	2.06394e-05	3.23792	Not-significant
SLC25A6	0.317194	4.79403	5.59491e-06	2.08364e-05	3.22793	Not-significant
CALM3	-0.324372	-4.79128	5.65774e-06	2.10524e-05	3.21716	Not-significant
BIRC2	0.242644	4.79105	5.66319e-06	2.10547e-05	3.21623	Not-significant
RCOR3	0.304882	4.78728	5.75047e-06	2.13472e-05	3.20148	Not-significant
DNASE2	-0.331934	-4.78723	5.75166e-06	2.13472e-05	3.20129	Not-significant
TARS2	-0.308662	-4.78667	5.76478e-06	2.13777e-05	3.19909	Not-significant
CIR1	0.355254	4.78638	5.77159e-06	2.13848e-05	3.19795	Not-significant
NOL9	0.292264	4.78549	5.79251e-06	2.14441e-05	3.19446	Not-significant
MAP7D1	-0.375159	-4.78467	5.8118e-06	2.14973e-05	3.19126	Not-significant
ISOC1	0.334292	4.78154	5.88606e-06	2.17535e-05	3.17901	Not-significant
ATP2C1	-0.722652	-4.77887	5.95027e-06	2.19722e-05	3.16855	Not-significant
MUS81	0.27618	4.7785	5.9593e-06	2.19818e-05	3.16709	Not-significant
PSMD1	-0.556014	-4.77835	5.96296e-06	2.19818e-05	3.1665	Not-significant
DUSP5	0.829455	4.77624	6.0142e-06	2.2152e-05	3.15825	Not-significant
YIF1A	-0.39526	-4.77381	6.07383e-06	2.23527e-05	3.14874	Not-significant
TMEM187	0.29252	4.76633	6.26071e-06	2.30118e-05	3.11953	Not-significant
PRPF40A	0.266789	4.76622	6.26347e-06	2.30118e-05	3.1191	Not-significant
NOLC1	-0.285034	-4.76594	6.27052e-06	2.30183e-05	3.11802	Not-significant
HECA	0.258791	4.76342	6.33503e-06	2.32355e-05	3.10815	Not-significant
BCKDHA	0.780064	4.76284	6.34986e-06	2.32704e-05	3.1059	Not-significant
SZRD1	-0.370753	-4.75878	6.4551e-06	2.36362e-05	3.09005	Not-significant
PRPF6	-0.485277	-4.75769	6.48365e-06	2.37208e-05	3.0858	Not-significant
RPP30	-0.323616	-4.75668	6.51035e-06	2.37985e-05	3.08184	Not-significant
HIGD1A	0.502918	4.75401	6.58112e-06	2.40371e-05	3.07142	Not-significant
H2BS1	-0.559178	-4.75148	6.64877e-06	2.42638e-05	3.06156	Not-significant
GANAB	-0.344118	-4.75097	6.66248e-06	2.42935e-05	3.05958	Not-significant
COX7C	0.357992	4.74791	6.74548e-06	2.45756e-05	3.04764	Not-significant
SH3GL1	0.337056	4.74689	6.7734e-06	2.46568e-05	3.04366	Not-significant
RPS18	-0.290986	-4.74166	6.91815e-06	2.51627e-05	3.02329	Not-significant
PSEN2	0.913632	4.73862	7.00354e-06	2.5452e-05	3.01147	Up-regulated
TMEM50A	0.24184	4.73637	7.06758e-06	2.56634e-05	3.0027	Not-significant
HGSNAT	0.257653	4.73588	7.08143e-06	2.56923e-05	3.00081	Not-significant
FAM118A	-0.360223	-4.73566	7.08775e-06	2.56938e-05	2.99995	Not-significant
MUC6	1.40095	4.73442	7.12335e-06	2.58014e-05	2.99512	Up-regulated
PSMA2	-0.251419	-4.73403	7.13461e-06	2.58208e-05	2.9936	Not-significant
F8A1	0.318989	4.73349	7.15013e-06	2.58548e-05	2.99151	Not-significant
RASA4	0.563571	4.73329	7.15588e-06	2.58548e-05	2.99073	Not-significant
RPL27	-0.310742	-4.73111	7.21924e-06	2.60622e-05	2.98224	Not-significant
OGA	0.225345	4.72954	7.26511e-06	2.62061e-05	2.97614	Not-significant
KHNYN	-0.346106	-4.72742	7.3275e-06	2.64093e-05	2.9679	Not-significant
CPNE3	0.480805	4.72525	7.39185e-06	2.66192e-05	2.95948	Not-significant
RPL30	-0.345978	-4.72255	7.47264e-06	2.68879e-05	2.949	Not-significant
UBE2L6	-0.47455	-4.72092	7.52192e-06	2.70429e-05	2.94267	Not-significant
ZNF252P	0.21148	4.71901	7.58022e-06	2.72301e-05	2.93524	Not-significant
CTNNB1	-0.325478	-4.71807	7.60901e-06	2.7311e-05	2.93158	Not-significant
DNAAF2	0.263709	4.71761	7.62299e-06	2.73387e-05	2.92982	Not-significant
OGDH	0.359185	4.71151	7.81277e-06	2.79963e-05	2.90613	Not-significant
FUT3	0.300464	4.71056	7.84254e-06	2.80799e-05	2.90247	Not-significant
VPS16	0.253322	4.71034	7.84954e-06	2.80819e-05	2.90161	Not-significant
DDX11	-0.310482	-4.70935	7.88103e-06	2.81714e-05	2.89775	Not-significant
PCSK7	0.36855	4.70649	7.97217e-06	2.84704e-05	2.88668	Not-significant
SSR1	-0.348586	-4.70632	7.9777e-06	2.84704e-05	2.88601	Not-significant
PIK3R1	0.338899	4.70608	7.98533e-06	2.84743e-05	2.88509	Not-significant
NDUFA8	0.334176	4.70551	8.00359e-06	2.8516e-05	2.88289	Not-significant
MGST1	0.73632	4.70513	8.01581e-06	2.85363e-05	2.88142	Not-significant
FOXO3	0.460907	4.70371	8.06191e-06	2.8677e-05	2.8759	Not-significant
KPNA2	-0.375965	-4.70185	8.12237e-06	2.88575e-05	2.8687	Not-significant
TBC1D10A	0.417772	4.70174	8.12588e-06	2.88575e-05	2.86829	Not-significant
ANKRD28	0.309753	4.70133	8.13926e-06	2.88815e-05	2.8667	Not-significant
REC8	0.709434	4.69651	8.29864e-06	2.94231e-05	2.84803	Not-significant
NDUFB10	0.245182	4.69527	8.34022e-06	2.95465e-05	2.84321	Not-significant
TAX1BP3	0.371184	4.69165	8.46208e-06	2.99538e-05	2.82925	Not-significant
WDR45	0.266531	4.68629	8.64651e-06	3.05818e-05	2.80849	Not-significant
MTX1	-0.43994	-4.68326	8.75201e-06	3.09299e-05	2.79681	Not-significant
CD59	0.553584	4.68295	8.76287e-06	3.09432e-05	2.79562	Not-significant
LRPPRC	-0.420086	-4.68266	8.7732e-06	3.09546e-05	2.79448	Not-significant
ATP5MC3	0.450082	4.68193	8.79906e-06	3.10208e-05	2.79165	Not-significant
PSME2	-0.560228	-4.68142	8.81706e-06	3.10591e-05	2.78968	Not-significant
TAF2	-0.289978	-4.67953	8.88391e-06	3.12693e-05	2.78241	Not-significant
UMPS	-0.479323	-4.67835	8.92615e-06	3.13927e-05	2.77784	Not-significant
BDH2	0.670319	4.67617	9.00475e-06	3.16436e-05	2.7694	Not-significant
LRP11	-0.291565	-4.67455	9.06325e-06	3.18235e-05	2.76317	Not-significant
TM4SF1	-0.656553	-4.67251	9.1377e-06	3.20591e-05	2.7553	Not-significant
GNA15	-0.422631	-4.67149	9.17508e-06	3.21644e-05	2.75137	Not-significant
TRAIP	-0.317315	-4.66961	9.24425e-06	3.23809e-05	2.74414	Not-significant
FBN1	-0.751911	-4.66662	9.35585e-06	3.27455e-05	2.73259	Not-significant
DUSP1	-0.298535	-4.66501	9.41614e-06	3.2913e-05	2.7264	Not-significant
MRPL9	-0.45422	-4.6648	9.42419e-06	3.2913e-05	2.72558	Not-significant
BNIP1	-0.298373	-4.66474	9.42636e-06	3.2913e-05	2.72536	Not-significant
SLC66A3	0.214264	4.65477	9.81023e-06	3.42259e-05	2.68694	Not-significant
AGRN	-0.249786	-4.65201	9.91909e-06	3.45781e-05	2.67633	Not-significant
CNOT1	0.283396	4.6511	9.95513e-06	3.4676e-05	2.67284	Not-significant
NDUFB2	0.269908	4.6501	9.9949e-06	3.47867e-05	2.669	Not-significant
MARCHF8	0.319402	4.64914	1.00333e-05	3.48924e-05	2.66531	Not-significant
CPSF4	0.256755	4.64886	1.00446e-05	3.49038e-05	2.66423	Not-significant
MID1IP1	0.265578	4.64849	1.00597e-05	3.49285e-05	2.66278	Not-significant
RPSA	-0.373249	-4.64731	1.01071e-05	3.50652e-05	2.65826	Not-significant
VMP1	-0.360281	-4.64585	1.01662e-05	3.52423e-05	2.65265	Not-significant
NIBAN2	-0.349389	-4.64268	1.02957e-05	3.56628e-05	2.64047	Not-significant
TMEM129	0.340913	4.64199	1.03239e-05	3.57321e-05	2.63784	Not-significant
DCTN2	0.331987	4.63728	1.05199e-05	3.63817e-05	2.61974	Not-significant
DYNLT1	-0.293848	-4.63532	1.06024e-05	3.66378e-05	2.61223	Not-significant
THOC7	0.317304	4.63512	1.06109e-05	3.66383e-05	2.61146	Not-significant
ZNF655	0.335841	4.62988	1.08351e-05	3.73827e-05	2.59134	Not-significant
RGS5	0.694312	4.62406	1.10895e-05	3.82301e-05	2.56902	Not-significant
LAMA5	-0.311833	-4.62139	1.12078e-05	3.86075e-05	2.55881	Not-significant
PMCH	0.231232	4.61726	1.13936e-05	3.92165e-05	2.543	Not-significant
EID1	0.224318	4.60913	1.17681e-05	4.04737e-05	2.5119	Not-significant
EIF3C	-0.364009	-4.60749	1.1845e-05	4.0706e-05	2.50564	Not-significant
AP3S1	0.206507	4.60677	1.18791e-05	4.0791e-05	2.50287	Not-significant
RPS28	0.263036	4.60289	1.20635e-05	4.13919e-05	2.48805	Not-significant
ARHGDIA	-0.309735	-4.60224	1.20947e-05	4.14661e-05	2.48558	Not-significant
POLR2E	-0.324079	-4.60187	1.21124e-05	4.14942e-05	2.48417	Not-significant
CAB39	0.3297	4.60144	1.21332e-05	4.15329e-05	2.48252	Not-significant
SLC6A8	-0.3	-4.59887	1.22577e-05	4.18904e-05	2.4727	Not-significant
RBM26	0.287841	4.5988	1.22613e-05	4.18904e-05	2.47242	Not-significant
ATG13	0.285046	4.59869	1.22665e-05	4.18904e-05	2.47202	Not-significant
PTPA	0.393314	4.59743	1.23278e-05	4.2067e-05	2.46722	Not-significant
TMUB1	0.501841	4.59692	1.23532e-05	4.21205e-05	2.46524	Not-significant
ERBB2	-0.61345	-4.59539	1.24282e-05	4.23433e-05	2.45942	Not-significant
TSPAN9	0.347124	4.59379	1.25072e-05	4.25793e-05	2.45333	Not-significant
MCM2	0.251805	4.59159	1.26172e-05	4.29201e-05	2.44491	Not-significant
YJU2	0.318302	4.5913	1.26319e-05	4.29354e-05	2.44379	Not-significant
TGIF1	-0.35033	-4.59111	1.26414e-05	4.29354e-05	2.44307	Not-significant
PSMD12	0.339046	4.58557	1.29219e-05	4.38539e-05	2.42197	Not-significant
SLC25A11	0.25878	4.58287	1.30612e-05	4.42923e-05	2.41166	Not-significant
TFF3	-2.02156	-4.58094	1.31615e-05	4.45978e-05	2.40431	Down-regulated
SLC25A46	0.386569	4.58052	1.31833e-05	4.4637e-05	2.40272	Not-significant
NUP98	0.180474	4.57331	1.3565e-05	4.58938e-05	2.37529	Not-significant
NCOA4	0.334235	4.57012	1.37371e-05	4.644e-05	2.36317	Not-significant
TRIM3	0.261904	4.56704	1.39057e-05	4.69735e-05	2.35145	Not-significant
PSMA6	1.34498	4.56466	1.40373e-05	4.73813e-05	2.3424	Up-regulated
NCAPG	0.212747	4.56364	1.40939e-05	4.75356e-05	2.33853	Not-significant
RAB5IF	-0.345063	-4.56291	1.41346e-05	4.76359e-05	2.33576	Not-significant
LAD1	-0.471071	-4.55943	1.43303e-05	4.82581e-05	2.32255	Not-significant
SEC11A	-0.271974	-4.55264	1.47197e-05	4.95314e-05	2.29679	Not-significant
KAT6B	0.600049	4.55165	1.47773e-05	4.96869e-05	2.29303	Not-significant
EML1	-0.438931	-4.54887	1.49402e-05	5.01959e-05	2.2825	Not-significant
SH2B1	0.284519	4.54493	1.51747e-05	5.09446e-05	2.26754	Not-significant
ADGRE5	-0.438964	-4.54346	1.52626e-05	5.12003e-05	2.26199	Not-significant
GATD3	-0.251738	-4.54176	1.53655e-05	5.15058e-05	2.25554	Not-significant
HBEGF	0.412967	4.54084	1.54212e-05	5.16526e-05	2.25206	Not-significant
PHF5A	-0.284424	-4.54007	1.54678e-05	5.1769e-05	2.24917	Not-significant
TGOLN2	-0.341563	-4.53247	1.5938e-05	5.33019e-05	2.2204	Not-significant
BAK1	-0.528968	-4.52845	1.61922e-05	5.41104e-05	2.20521	Not-significant
FAM50B	0.342808	4.52198	1.66097e-05	5.54631e-05	2.18076	Not-significant
PPP1R15B	0.403331	4.52033	1.6718e-05	5.5782e-05	2.17452	Not-significant
MRPL20	-0.315557	-4.51989	1.67465e-05	5.58345e-05	2.17288	Not-significant
TNNC1	0.213211	4.51947	1.67747e-05	5.58857e-05	2.17127	Not-significant
ARRDC1	0.369549	4.51853	1.68368e-05	5.60499e-05	2.16772	Not-significant
KRT23	-0.677927	-4.51792	1.68773e-05	5.61417e-05	2.16541	Not-significant
HNRNPA1	-0.252221	-4.51691	1.69438e-05	5.63201e-05	2.16164	Not-significant
CNBP	0.408403	4.51353	1.71703e-05	5.70295e-05	2.14889	Not-significant
ADAP1	-0.388224	-4.51284	1.72172e-05	5.71419e-05	2.14627	Not-significant
GIMAP2	-0.384315	-4.50699	1.76174e-05	5.84254e-05	2.12421	Not-significant
PIGQ	0.252838	4.50614	1.76762e-05	5.8576e-05	2.12101	Not-significant
TERF2	0.251202	4.49812	1.82405e-05	6.04e-05	2.09084	Not-significant
NPM3	-0.426823	-4.49697	1.83234e-05	6.06286e-05	2.08649	Not-significant
RPL11	0.275697	4.4944	1.85088e-05	6.11953e-05	2.07683	Not-significant
PSMC3	-0.360225	-4.49262	1.8638e-05	6.15759e-05	2.07015	Not-significant
PPP4C	-0.216437	-4.49175	1.87017e-05	6.17397e-05	2.06688	Not-significant
SNHG5	-0.240361	-4.49153	1.87181e-05	6.1747e-05	2.06604	Not-significant
TIMM44	0.198085	4.49098	1.87581e-05	6.18324e-05	2.06398	Not-significant
ODF2	-0.403443	-4.48995	1.88343e-05	6.20366e-05	2.0601	Not-significant
WASF2	0.246464	4.48885	1.89152e-05	6.2256e-05	2.05598	Not-significant
SPAG5	-0.36616	-4.4886	1.89339e-05	6.22704e-05	2.05504	Not-significant
ARF4	-0.368873	-4.4874	1.90227e-05	6.25156e-05	2.05054	Not-significant
CHCHD3	-0.433685	-4.48409	1.92713e-05	6.32846e-05	2.03809	Not-significant
GFM2	-0.417946	-4.481	1.95053e-05	6.40048e-05	2.0265	Not-significant
MXD4	0.245969	4.47925	1.96396e-05	6.43971e-05	2.01992	Not-significant
ZPR1	-0.382111	-4.47904	1.96558e-05	6.4402e-05	2.01912	Not-significant
DDX27	-0.299301	-4.47789	1.9744e-05	6.46425e-05	2.01483	Not-significant
MADD	0.653035	4.47398	2.00483e-05	6.55894e-05	2.00015	Not-significant
CDCP1	0.868897	4.47185	2.0216e-05	6.60884e-05	1.99216	Not-significant
PVT1	-0.447987	-4.47146	2.02461e-05	6.61373e-05	1.99074	Not-significant
SDHC	0.288831	4.47011	2.03537e-05	6.64389e-05	1.98565	Not-significant
PNP	0.623681	4.4684	2.04902e-05	6.68346e-05	1.97924	Not-significant
AIDA	-0.523407	-4.46558	2.07167e-05	6.75228e-05	1.96869	Not-significant
SLC4A2	0.461893	4.46498	2.07656e-05	6.76318e-05	1.96643	Not-significant
CFL1	-0.363818	-4.46464	2.07929e-05	6.76699e-05	1.96517	Not-significant
AGL	0.248492	4.462	2.10081e-05	6.83193e-05	1.95529	Not-significant
C11orf80	-0.31208	-4.46066	2.11186e-05	6.86275e-05	1.95026	Not-significant
SUDS3	0.284466	4.45707	2.14156e-05	6.95409e-05	1.93686	Not-significant
GRIP2	-0.377247	-4.45681	2.14376e-05	6.95604e-05	1.93588	Not-significant
CCNC	0.33666	4.45536	2.15595e-05	6.99041e-05	1.93044	Not-significant
EPHB4	-0.24441	-4.45497	2.15917e-05	6.99564e-05	1.92901	Not-significant
UFD1	-0.314313	-4.45458	2.16245e-05	7.00108e-05	1.92755	Not-significant
ZNF609	-0.456185	-4.45056	2.19659e-05	7.10633e-05	1.91253	Not-significant
TPST2	0.254436	4.44865	2.21305e-05	7.15426e-05	1.90537	Not-significant
GTPBP6	0.402547	4.44729	2.22479e-05	7.18688e-05	1.9003	Not-significant
RPS24	-0.395033	-4.44665	2.2303e-05	7.19937e-05	1.89792	Not-significant
PELP1	-0.315778	-4.44555	2.23991e-05	7.22503e-05	1.8938	Not-significant
PRSS8	0.547414	4.44477	2.24671e-05	7.2416e-05	1.8909	Not-significant
TMEM176B	-0.290945	-4.44016	2.28735e-05	7.36717e-05	1.8737	Not-significant
EIF3M	-0.436976	-4.43846	2.30257e-05	7.41072e-05	1.86734	Not-significant
CYLD	0.583197	4.43704	2.31527e-05	7.44609e-05	1.86207	Not-significant
ADGRG1	-0.610485	-4.43488	2.33477e-05	7.50328e-05	1.85403	Not-significant
TNF	0.237869	4.4344	2.33919e-05	7.51193e-05	1.85222	Not-significant
LSG1	-0.227648	-4.43314	2.35065e-05	7.54318e-05	1.84753	Not-significant
TXNL1	-0.439089	-4.43239	2.35753e-05	7.5597e-05	1.84473	Not-significant
CAPZB	-0.245191	-4.41999	2.4738e-05	7.92669e-05	1.79858	Not-significant
KIF2C	-0.403967	-4.41197	2.55191e-05	8.171e-05	1.76878	Not-significant
LBH	-0.428611	-4.40904	2.5811e-05	8.25758e-05	1.75788	Not-significant
GNB2	0.499621	4.40887	2.58274e-05	8.25758e-05	1.75727	Not-significant
LAMB1	-0.397724	-4.40848	2.58662e-05	8.2639e-05	1.75584	Not-significant
SLC25A33	-0.46159	-4.4037	2.63499e-05	8.41229e-05	1.73808	Not-significant
HIF1AN	0.371129	4.40255	2.64679e-05	8.44377e-05	1.7338	Not-significant
FPGS	0.235223	4.40173	2.65518e-05	8.46437e-05	1.73076	Not-significant
MYADM	0.420139	4.39619	2.71264e-05	8.6412e-05	1.71025	Not-significant
DECR1	0.306604	4.39562	2.71864e-05	8.654e-05	1.70813	Not-significant
PITPNM2	-0.311651	-4.39372	2.73869e-05	8.71148e-05	1.70109	Not-significant
EXTL2	0.308503	4.39063	2.77157e-05	8.80964e-05	1.68966	Not-significant
FHIP2B	0.888531	4.38889	2.79026e-05	8.86258e-05	1.68322	Not-significant
SLCO2B1	0.2563	4.38599	2.82168e-05	8.95587e-05	1.67249	Not-significant
ZNF211	0.339467	4.38284	2.85627e-05	9.05906e-05	1.66082	Not-significant
GDI2	0.329585	4.38189	2.86674e-05	9.08564e-05	1.65732	Not-significant
XPNPEP1	-0.499725	-4.3803	2.88436e-05	9.13485e-05	1.65145	Not-significant
VPS51	0.371768	4.37245	2.97307e-05	9.40895e-05	1.62244	Not-significant
COPS5	0.210329	4.37199	2.97829e-05	9.41865e-05	1.62076	Not-significant
METAP2	-0.42646	-4.36713	3.03463e-05	9.58986e-05	1.60281	Not-significant
EPB41L4A	0.483092	4.36042	3.11399e-05	9.83355e-05	1.57809	Not-significant
EIF4EBP3	0.250346	4.34986	3.24306e-05	0.000102337	1.53921	Not-significant
BCAP31	-0.46957	-4.3432	3.32704e-05	0.000104911	1.51473	Not-significant
DHODH	0.206382	4.34299	3.3298e-05	0.000104922	1.51394	Not-significant
URM1	-0.226577	-4.33603	3.41992e-05	0.000107674	1.48838	Not-significant
ZNF33A	0.334942	4.33572	3.42394e-05	0.000107674	1.48726	Not-significant
YIPF3	-0.341833	-4.33568	3.42453e-05	0.000107674	1.48709	Not-significant
NKIRAS2	0.350642	4.3344	3.44129e-05	0.000108123	1.48242	Not-significant
DNAJC25-GNG10	-0.5301	-4.32874	3.51682e-05	0.000110416	1.46164	Not-significant
RFNG	0.361329	4.32728	3.53647e-05	0.000110953	1.45631	Not-significant
PEA15	-0.5333	-4.32417	3.57894e-05	0.000112149	1.44489	Not-significant
FAM219B	0.4138	4.32411	3.57971e-05	0.000112149	1.44468	Not-significant
SULT1C2	0.464653	4.32322	3.59194e-05	0.000112451	1.44142	Not-significant
AP2B1	-0.388177	-4.32278	3.59801e-05	0.00011256	1.4398	Not-significant
NEK9	0.233878	4.31983	3.63886e-05	0.000113757	1.429	Not-significant
BRD3	0.228589	4.3195	3.64344e-05	0.000113818	1.4278	Not-significant
RALA	0.274858	4.31783	3.66672e-05	0.000114463	1.42171	Not-significant
GNG12	0.188081	4.30727	3.81785e-05	0.000119096	1.38307	Not-significant
SPTBN1	-0.214411	-4.30279	3.88362e-05	0.000121061	1.36673	Not-significant
MECR	0.215098	4.30255	3.88729e-05	0.000121089	1.36583	Not-significant
GPN2	-0.49891	-4.30157	3.90184e-05	0.000121456	1.36225	Not-significant
MSLN	-0.482551	-4.3009	3.91181e-05	0.000121679	1.35981	Not-significant
FAM219A	0.380632	4.2995	3.93274e-05	0.000122243	1.35471	Not-significant
CD164	0.246266	4.29841	3.94912e-05	0.000122664	1.35073	Not-significant
FOXN3	-0.350903	-4.29575	3.9894e-05	0.000123828	1.34103	Not-significant
DDX19B	-0.248329	-4.29283	4.03406e-05	0.000125125	1.33038	Not-significant
MUC13	-1.06565	-4.29234	4.04166e-05	0.000125271	1.32858	Down-regulated
FOXG1	0.300538	4.2911	4.06083e-05	0.000125773	1.32406	Not-significant
TUBD1	0.278201	4.29092	4.0636e-05	0.000125773	1.32341	Not-significant
PPRC1	-0.283198	-4.28767	4.11419e-05	0.000127248	1.31158	Not-significant
EIF4G2	-0.225522	-4.2812	4.21679e-05	0.000130255	1.28803	Not-significant
AP1B1	0.230167	4.28116	4.21745e-05	0.000130255	1.28788	Not-significant
TCAIM	0.229468	4.2808	4.22323e-05	0.000130255	1.28657	Not-significant
AP5Z1	0.199321	4.28079	4.22336e-05	0.000130255	1.28654	Not-significant
PRKAR1A	0.325928	4.27855	4.25946e-05	0.000131276	1.2784	Not-significant
TMEM245	0.237089	4.27592	4.30224e-05	0.000132499	1.26885	Not-significant
ACBD5	0.189044	4.27574	4.30522e-05	0.000132499	1.26818	Not-significant
VPS28	0.320442	4.27505	4.31658e-05	0.000132755	1.26567	Not-significant
DCN	0.724937	4.27465	4.3232e-05	0.000132828	1.2642	Not-significant
FAAH	0.408931	4.27453	4.32507e-05	0.000132828	1.26379	Not-significant
CD55	-0.852151	-4.27215	4.36436e-05	0.000133941	1.25514	Not-significant
DRG2	0.411222	4.26919	4.41377e-05	0.000135362	1.24438	Not-significant
MAP4K4	-0.458163	-4.26842	4.42672e-05	0.000135664	1.24158	Not-significant
SERF2	0.449198	4.26745	4.44298e-05	0.000136066	1.23808	Not-significant
PTGFRN	0.282445	4.26443	4.49432e-05	0.000137542	1.2271	Not-significant
ADGRV1	0.393801	4.26358	4.50881e-05	0.000137889	1.22402	Not-significant
CAPRIN1	-0.397084	-4.26268	4.52429e-05	0.000138265	1.22075	Not-significant
GFM1	-0.40795	-4.25974	4.57501e-05	0.000139678	1.21009	Not-significant
POLR1D	0.300872	4.25963	4.57693e-05	0.000139678	1.20969	Not-significant
SIPA1L1	0.27837	4.25855	4.59574e-05	0.000140154	1.20577	Not-significant
EXOSC4	-0.315843	-4.25769	4.61078e-05	0.000140514	1.20265	Not-significant
RUBCN	0.194846	4.25231	4.70567e-05	0.000143306	1.18318	Not-significant
GGA1	-0.259405	-4.25207	4.71008e-05	0.00014334	1.18229	Not-significant
MTFP1	-0.314305	-4.24769	4.78876e-05	0.000145633	1.16646	Not-significant
PHLDA1	0.263077	4.24521	4.83399e-05	0.000146906	1.15748	Not-significant
ECT2	-0.29342	-4.24083	4.91486e-05	0.00014926	1.14163	Not-significant
LERFS	0.379407	4.2363	4.99978e-05	0.000151733	1.12527	Not-significant
PSMD4	-0.305162	-4.23051	5.11043e-05	0.000154983	1.10436	Not-significant
RAB29	-0.26902	-4.22916	5.13643e-05	0.000155664	1.09951	Not-significant
CDC123	-0.298268	-4.22664	5.18568e-05	0.000157047	1.0904	Not-significant
FLOT1	-0.3096	-4.22482	5.22144e-05	0.000157987	1.08383	Not-significant
HEIH	0.330303	4.22465	5.22479e-05	0.000157987	1.08322	Not-significant
ATP6V1G1	0.41695	4.22443	5.22914e-05	0.000157987	1.08243	Not-significant
DYNLL1	-0.199803	-4.22425	5.23266e-05	0.000157987	1.08179	Not-significant
NUP37	-0.42349	-4.22414	5.23482e-05	0.000157987	1.08139	Not-significant
NTMT1	-0.463171	-4.22375	5.24244e-05	0.000158107	1.08	Not-significant
CAPNS1	0.552352	4.22089	5.29931e-05	0.000159673	1.0697	Not-significant
TNFRSF1B	-0.370815	-4.22077	5.30168e-05	0.000159673	1.06927	Not-significant
CHAC1	0.270663	4.21855	5.34633e-05	0.000160907	1.06126	Not-significant
PLPPR2	-0.674844	-4.21734	5.37073e-05	0.000161529	1.05692	Not-significant
BRWD1	0.225273	4.21205	5.47907e-05	0.000164674	1.03785	Not-significant
ICAM3	0.439482	4.20835	5.55584e-05	0.000166867	1.02456	Not-significant
TRAPPC2	0.412258	4.20796	5.56402e-05	0.000166997	1.02316	Not-significant
LCLAT1	0.255004	4.20593	5.60673e-05	0.000168117	1.01586	Not-significant
NCAPG2	-0.372353	-4.20582	5.60904e-05	0.000168117	1.01547	Not-significant
CSPP1	0.565881	4.205	5.62639e-05	0.000168521	1.01252	Not-significant
TOP1	0.223752	4.20287	5.67158e-05	0.000169758	1.00488	Not-significant
ALDOC	0.510655	4.20154	5.70014e-05	0.000170496	1.00009	Not-significant
ATP5PB	0.294358	4.19932	5.74784e-05	0.000171805	0.992135	Not-significant
ARHGEF19	0.238273	4.19795	5.77756e-05	0.000172575	0.987212	Not-significant
GMPS	-0.243405	-4.19441	5.85503e-05	0.000174769	0.9745	Not-significant
DKK1	0.594319	4.19239	5.8995e-05	0.000175976	0.967278	Not-significant
ADORA2B	0.291589	4.18988	5.95555e-05	0.000177527	0.958255	Not-significant
ZNF444	-0.274463	-4.18632	6.0357e-05	0.000179793	0.945498	Not-significant
POLR3C	0.723155	4.1854	6.05651e-05	0.00018029	0.942214	Not-significant
PSME1	-0.309613	-4.18282	6.11542e-05	0.000181919	0.932978	Not-significant
SDF4	0.33642	4.18245	6.12403e-05	0.000182051	0.931636	Not-significant
UGP2	0.351712	4.17421	6.31599e-05	0.00018763	0.902191	Not-significant
QDPR	0.412273	4.17227	6.36225e-05	0.000188875	0.895229	Not-significant
P3H1	-0.378011	-4.16699	6.48918e-05	0.000192512	0.876387	Not-significant
HSD17B10	-0.230059	-4.16449	6.55013e-05	0.000194188	0.867469	Not-significant
AZI2	-0.330482	-4.16105	6.63508e-05	0.000196573	0.85518	Not-significant
TIMM17B	-0.369934	-4.15828	6.70415e-05	0.000198485	0.845305	Not-significant
KLK8	0.219556	4.15737	6.72684e-05	0.000199021	0.842082	Not-significant
TAF10	0.415104	4.15685	6.73997e-05	0.000199175	0.840223	Not-significant
ENDOG	0.219226	4.1568	6.74117e-05	0.000199175	0.840052	Not-significant
LONP2	0.288277	4.15239	6.85331e-05	0.000202351	0.824321	Not-significant
SYVN1	0.306129	4.15063	6.89848e-05	0.000203462	0.818057	Not-significant
TCTN3	0.280406	4.15056	6.90027e-05	0.000203462	0.81781	Not-significant
CREB3L2	0.343214	4.15022	6.90901e-05	0.000203582	0.816603	Not-significant
KPNA4	-0.499663	-4.1476	6.97695e-05	0.000205445	0.807273	Not-significant
PPID	0.208158	4.14338	7.08753e-05	0.000208561	0.792281	Not-significant
PYROXD2	0.240862	4.14298	7.09826e-05	0.000208736	0.790839	Not-significant
NEK6	0.347596	4.14094	7.1523e-05	0.000210183	0.783608	Not-significant
MPDU1	0.3652	4.1343	7.33157e-05	0.000215306	0.760011	Not-significant
POLR2C	-0.336815	-4.13227	7.38714e-05	0.000216792	0.752814	Not-significant
IP6K1	-0.370476	-4.12927	7.47017e-05	0.000219081	0.742162	Not-significant
CAPG	-0.477677	-4.12461	7.60071e-05	0.00022276	0.725652	Not-significant
LYPLA1	-0.270461	-4.11932	7.75187e-05	0.000227007	0.706888	Not-significant
HSPA9	-0.372491	-4.11917	7.75602e-05	0.000227007	0.706377	Not-significant
PKNOX1	0.28186	4.11892	7.76323e-05	0.000227065	0.705492	Not-significant
NDUFA4	0.293373	4.11776	7.79674e-05	0.000227893	0.701388	Not-significant
EXOSC3	0.280042	4.11578	7.8543e-05	0.000229421	0.69438	Not-significant
GCSH	0.20853	4.11476	7.88416e-05	0.000230139	0.690764	Not-significant
UTP14A	-0.666936	-4.11081	8.0007e-05	0.000233385	0.676786	Not-significant
OAZ2	0.350807	4.10914	8.0503e-05	0.000234675	0.670898	Not-significant
DDX39A	-0.24561	-4.1073	8.1055e-05	0.000236126	0.664388	Not-significant
NDUFS4	0.300593	4.10458	8.18767e-05	0.000238361	0.65478	Not-significant
CHMP4C	0.223409	4.10121	8.29073e-05	0.0002412	0.642866	Not-significant
IQGAP2	0.354631	4.1006	8.30937e-05	0.000241581	0.640727	Not-significant
PLAAT3	-0.29777	-4.09938	8.34703e-05	0.000242514	0.63642	Not-significant
PCED1A	0.190496	4.08937	8.6623e-05	0.000251507	0.601114	Not-significant
SPRED2	0.228825	4.08261	8.88141e-05	0.000257688	0.57733	Not-significant
RNF10	0.324958	4.08244	8.887e-05	0.000257688	0.57673	Not-significant
PDLIM5	0.235345	4.08108	8.93185e-05	0.000258816	0.571938	Not-significant
GALC	0.17599	4.08035	8.95591e-05	0.000259341	0.569377	Not-significant
ASB13	0.190211	4.08005	8.96607e-05	0.000259463	0.568297	Not-significant
TMEM51	0.417505	4.06941	9.32509e-05	0.000269673	0.530925	Not-significant
NAE1	-0.48744	-4.0669	9.4119e-05	0.000272003	0.522106	Not-significant
PNISR	0.22538	4.06292	9.55081e-05	0.000275835	0.508162	Not-significant
SMURF2	0.210837	4.06152	9.60022e-05	0.000277079	0.503252	Not-significant
NAA60	0.333329	4.06121	9.61127e-05	0.000277214	0.502158	Not-significant
ANTXR2	-0.355136	-4.06076	9.62729e-05	0.000277492	0.500573	Not-significant
CENPX	-0.359511	-4.05672	9.77126e-05	0.000281456	0.486448	Not-significant
NCKAP1	0.267693	4.056	9.79733e-05	0.000282021	0.483913	Not-significant
HDHD5	-0.415109	-4.05368	9.88119e-05	0.000284247	0.475804	Not-significant
MUC4	-0.429845	-4.05158	9.9581e-05	0.000286271	0.468427	Not-significant
CDR2L	-0.412124	-4.05079	9.98692e-05	0.00028691	0.465677	Not-significant
EPHX2	0.350801	4.05021	0.000100083	0.000287335	0.463644	Not-significant
ALG1	-0.265101	-4.04927	0.00010043	0.000288142	0.460347	Not-significant
AEN	-0.232707	-4.0488	0.000100602	0.000288446	0.458719	Not-significant
TNRC18	-0.288224	-4.04756	0.000101061	0.000289571	0.454391	Not-significant
NPDC1	0.616468	4.04581	0.000101715	0.000291252	0.44826	Not-significant
DNTTIP1	-0.379567	-4.04414	0.000102342	0.000292855	0.442414	Not-significant
FERMT1	0.228086	4.04344	0.000102602	0.000293409	0.439993	Not-significant
CHTF18	-0.271224	-4.04305	0.00010275	0.00029364	0.438622	Not-significant
ABCA3	0.296185	4.04067	0.000103653	0.000296026	0.4303	Not-significant
SLC35D2	0.4517	4.03264	0.000106755	0.000304684	0.402261	Not-significant
DHFR	-0.757393	-4.02846	0.000108402	0.00030902	0.387699	Not-significant
MAPK1IP1L	0.222842	4.02842	0.000108416	0.00030902	0.387578	Not-significant
ABI2	0.238871	4.02467	0.000109918	0.000313097	0.374496	Not-significant
RBM39	0.200403	4.02179	0.00011108	0.000316202	0.364493	Not-significant
MRPL30	0.26085	4.02009	0.000111775	0.000317971	0.358568	Not-significant
MYO5C	0.237989	4.01663	0.000113198	0.00032181	0.34654	Not-significant
EIF2AK1	0.184313	4.01531	0.000113746	0.000323038	0.341945	Not-significant
RPS26	-0.289652	-4.01524	0.000113778	0.000323038	0.341679	Not-significant
TMEM181	-0.280708	-4.0108	0.000115639	0.000328107	0.326262	Not-significant
HP1BP3	0.204739	4.01013	0.000115922	0.000328696	0.323937	Not-significant
SLC25A12	0.205111	4.00808	0.000116791	0.000330764	0.316834	Not-significant
TRMT1	-0.4145	-4.00806	0.000116803	0.000330764	0.316742	Not-significant
CDK5	-0.332742	-4.00219	0.000119333	0.000337709	0.296377	Not-significant
DDX39B	-0.303569	-4.00065	0.000120006	0.000339393	0.291034	Not-significant
MRPL18	-0.229933	-3.99991	0.000120332	0.000340095	0.288454	Not-significant
POM121L2	0.429131	3.99889	0.00012078	0.00034114	0.284925	Not-significant
EEF1E1	-0.344437	-3.99731	0.000121475	0.000342882	0.279469	Not-significant
RAD9A	0.236948	3.99613	0.000122002	0.000344147	0.275354	Not-significant
LAPTM5	-0.338714	-3.99377	0.000123054	0.00034689	0.267197	Not-significant
PGM1	0.285765	3.99269	0.00012354	0.000348034	0.263455	Not-significant
PCBD1	0.245273	3.99179	0.000123944	0.000348948	0.26035	Not-significant
C11orf1	0.441402	3.99095	0.000124327	0.000349801	0.257416	Not-significant
PCLAF	-0.257914	-3.98324	0.000127863	0.000359517	0.230778	Not-significant
HADHA	0.567704	3.98233	0.000128288	0.000360349	0.227628	Not-significant
EIF4EBP1	-0.598233	-3.98225	0.000128324	0.000360349	0.227359	Not-significant
MRPL34	0.34154	3.98175	0.000128562	0.000360784	0.225601	Not-significant
PRKCSH	-0.281359	-3.9811	0.000128862	0.000361394	0.223385	Not-significant
LAMB3	-0.384454	-3.97985	0.000129453	0.000362819	0.219038	Not-significant
BCL7C	-0.363561	-3.97826	0.0001302	0.000364678	0.213573	Not-significant
EGR1	0.675418	3.96825	0.000135025	0.000377948	0.179022	Not-significant
GALNT1	0.200668	3.96789	0.000135199	0.000378193	0.177797	Not-significant
API5	-0.271046	-3.9661	0.000136083	0.000380423	0.171605	Not-significant
DLG3	0.252205	3.96538	0.000136438	0.00038117	0.169134	Not-significant
ARRDC2	-0.166393	-3.96379	0.000137228	0.000383131	0.163654	Not-significant
GPR160	0.205309	3.95955	0.000139354	0.00038882	0.149054	Not-significant
SLCO1B3	0.223833	3.95833	0.000139971	0.000390291	0.144861	Not-significant
PMVK	0.203617	3.95569	0.000141317	0.000393791	0.135779	Not-significant
KCTD10	-0.339038	-3.95546	0.000141432	0.000393861	0.135005	Not-significant
ASB8	0.289801	3.9505	0.000143996	0.000400745	0.117952	Not-significant
URI1	-0.545964	-3.94724	0.000145704	0.00040524	0.106761	Not-significant
CKS2	-0.241866	-3.94679	0.000145944	0.000405649	0.105198	Not-significant
RSL24D1	0.204607	3.94522	0.000146772	0.000407689	0.0998315	Not-significant
HNRNPD	-0.253442	-3.94461	0.000147097	0.000408331	0.097734	Not-significant
KTN1	-0.2767	-3.94424	0.000147294	0.00040862	0.0964594	Not-significant
FH	0.374338	3.94225	0.00014836	0.000411314	0.0896202	Not-significant
HMGXB4	0.284671	3.94094	0.000149061	0.000412996	0.0851451	Not-significant
AZIN1	-0.489863	-3.93809	0.000150605	0.000417007	0.0753707	Not-significant
DROSHA	0.320628	3.93515	0.000152213	0.000421193	0.065293	Not-significant
TCTA	-0.275287	-3.93358	0.000153079	0.000423169	0.0599077	Not-significant
BCAP29	0.492977	3.9335	0.000153121	0.000423169	0.0596496	Not-significant
MAPRE2	0.244623	3.93293	0.000153438	0.000423778	0.0576837	Not-significant
SWT1	0.321745	3.9316	0.000154177	0.000425535	0.0531289	Not-significant
RAB35	0.191132	3.93143	0.00015427	0.000425535	0.0525565	Not-significant
CSNK1E	0.158697	3.93103	0.000154494	0.000425884	0.051179	Not-significant
KCNN4	0.390074	3.93057	0.00015475	0.000426321	0.0496062	Not-significant
MMS19	0.413224	3.92799	0.000156198	0.000430037	0.0407745	Not-significant
ARG2	0.441975	3.92736	0.000156555	0.000430748	0.0386102	Not-significant
MTHFD2	-0.481922	-3.92635	0.000157127	0.00043205	0.0351485	Not-significant
RPL36A	-0.288358	-3.92458	0.000158129	0.00043453	0.0291218	Not-significant
DYNC1H1	-0.294736	-3.92415	0.000158373	0.000434928	0.0276561	Not-significant
NDUFA13	0.241426	3.92072	0.000160343	0.00044006	0.0159325	Not-significant
ASPH	0.25225	3.92001	0.000160754	0.000440912	0.0135008	Not-significant
ADGRL2	0.241643	3.91427	0.000164113	0.00044984	-0.00610716	Not-significant
CHERP	0.227937	3.91307	0.000164823	0.000451503	-0.0102009	Not-significant
NUPR1	0.556518	3.91143	0.000165795	0.000453882	-0.015779	Not-significant
RPL28	-0.269898	-3.91023	0.000166513	0.00045556	-0.0198738	Not-significant
HSD17B12	0.450769	3.90717	0.000168356	0.000460313	-0.0303084	Not-significant
USP21	-0.316833	-3.90653	0.000168745	0.000461089	-0.0325	Not-significant
TFCP2	0.16361	3.9058	0.00016919	0.000462014	-0.0349934	Not-significant
TSPAN1	0.949144	3.90432	0.00017009	0.000464181	-0.0400246	Up-regulated
GPN1	0.280123	3.90225	0.000171361	0.000467358	-0.0470839	Not-significant
HSPA5	-0.265146	-3.90121	0.000171998	0.00046879	-0.0506022	Not-significant
NDUFS2	0.177852	3.90105	0.000172101	0.00046879	-0.0511692	Not-significant
EEF1AKMT4	-0.291205	-3.89838	0.000173755	0.000473	-0.0602353	Not-significant
GRB10	0.27642	3.89777	0.000174137	0.000473744	-0.0623168	Not-significant
CHN2	-0.27602	-3.89733	0.000174412	0.000474196	-0.0638126	Not-significant
GOLGA2	0.288156	3.89529	0.000175694	0.000477383	-0.0707515	Not-significant
POLR2J	-0.250646	-3.88891	0.00017976	0.000488128	-0.0924368	Not-significant
NDUFA6	0.308291	3.87916	0.000186149	0.000505161	-0.125528	Not-significant
PAK1	0.35209	3.87697	0.000187609	0.000508808	-0.132931	Not-significant
RAB1B	-0.228937	-3.87563	0.000188515	0.000510947	-0.137496	Not-significant
MTDH	-0.39735	-3.86934	0.000192798	0.00052223	-0.158774	Not-significant
SEPHS2	0.206561	3.86768	0.000193941	0.000525002	-0.164377	Not-significant
ESRRA	0.386857	3.86435	0.000196267	0.000530968	-0.175666	Not-significant
ELF4	0.336124	3.86332	0.000196985	0.00053258	-0.179124	Not-significant
CUL4A	-0.481493	-3.86057	0.000198929	0.000537502	-0.188422	Not-significant
THAP12	0.163427	3.8562	0.000202049	0.000545595	-0.203162	Not-significant
IDH3B	-0.356129	-3.85527	0.000202724	0.000547078	-0.206318	Not-significant
TMOD1	0.21623	3.85348	0.000204019	0.000550234	-0.212349	Not-significant
CCL15	-0.814587	-3.85323	0.000204205	0.000550394	-0.21321	Not-significant
CRTC3	0.217335	3.85269	0.000204598	0.000551113	-0.215031	Not-significant
CCDC6	-0.344563	-3.85076	0.000206008	0.000554569	-0.221535	Not-significant
WDHD1	0.296299	3.84884	0.000207416	0.000558015	-0.227982	Not-significant
ZNF767P	0.341107	3.84764	0.000208304	0.000560059	-0.232027	Not-significant
PITRM1	-0.290885	-3.84662	0.000209067	0.000561762	-0.235485	Not-significant
PON2	0.205733	3.84182	0.000212665	0.000571079	-0.251639	Not-significant
RBM23	0.223691	3.83909	0.000214743	0.000576304	-0.260841	Not-significant
INTS8	-0.384242	-3.83085	0.000221115	0.000593039	-0.288513	Not-significant
PIGN	0.375648	3.82607	0.000224895	0.000602807	-0.304552	Not-significant
FOXJ3	0.216116	3.8254	0.000225436	0.000603886	-0.306826	Not-significant
DEXI	0.192116	3.82423	0.000226369	0.000606012	-0.310731	Not-significant
CD68	-0.483136	-3.82394	0.000226601	0.000606261	-0.3117	Not-significant
RAD17	0.472663	3.82234	0.000227892	0.000609343	-0.317078	Not-significant
MAN1B1	-0.4072	-3.82186	0.000228282	0.000610012	-0.318695	Not-significant
CKAP2	-0.277676	-3.82147	0.000228592	0.000610465	-0.319977	Not-significant
COQ9	0.418537	3.81959	0.000230127	0.000614188	-0.326307	Not-significant
SEZ6L2	-0.24797	-3.81165	0.000236682	0.000631297	-0.352874	Not-significant
PUF60	-0.239525	-3.80803	0.000239737	0.000639054	-0.365002	Not-significant
SSU72	0.2776	3.80589	0.000241553	0.000643501	-0.372137	Not-significant
VDR	0.294436	3.80415	0.000243042	0.000646758	-0.37795	Not-significant
SNHG1	0.266816	3.80412	0.000243072	0.000646758	-0.378066	Not-significant
BHLHE40	-0.40686	-3.80202	0.000244876	0.000651162	-0.385058	Not-significant
SPTLC3	-0.344215	-3.80167	0.000245178	0.000651251	-0.386223	Not-significant
BAG1	0.250274	3.80164	0.000245208	0.000651251	-0.386341	Not-significant
DCAF1	-0.384743	-3.80015	0.000246505	0.000654296	-0.391327	Not-significant
RPL23	-0.413865	-3.79896	0.000247537	0.000656635	-0.395276	Not-significant
HSP90AB1	-0.359729	-3.79771	0.00024863	0.000659134	-0.399442	Not-significant
ATP6AP1	0.289929	3.79614	0.000250014	0.000662402	-0.404692	Not-significant
TMX2	-0.308124	-3.79548	0.000250595	0.000663279	-0.406884	Not-significant
SH3D19	0.267226	3.79542	0.00025065	0.000663279	-0.407091	Not-significant
STUB1	-0.295753	-3.79421	0.000251721	0.000665627	-0.411121	Not-significant
RABAC1	0.204692	3.79408	0.000251842	0.000665627	-0.411578	Not-significant
FN3K	-0.244607	-3.793	0.000252799	0.000667751	-0.415163	Not-significant
MRPS6	-0.20632	-3.79184	0.000253836	0.000670083	-0.41903	Not-significant
WHRN	-0.316488	-3.79008	0.000255413	0.00067384	-0.424887	Not-significant
TKT	-0.320687	-3.7884	0.00025693	0.000677431	-0.430482	Not-significant
UGT8	0.505555	3.78635	0.000258792	0.000681929	-0.437308	Not-significant
DCPS	-0.311778	-3.78065	0.000264042	0.000695124	-0.456286	Not-significant
CRIP1	-0.474421	-3.78057	0.000264119	0.000695124	-0.456561	Not-significant
NEK4	0.220297	3.77414	0.000270159	0.000710594	-0.477928	Not-significant
ALDH3B1	-0.32449	-3.7737	0.000270575	0.000711258	-0.47938	Not-significant
CDKAL1	0.369562	3.77002	0.000274094	0.000720074	-0.491587	Not-significant
HTATSF1	-0.241716	-3.76942	0.000274672	0.000721014	-0.493577	Not-significant
RBBP4	-0.31398	-3.76931	0.000274782	0.000721014	-0.493956	Not-significant
ASAH1	-0.246396	-3.76745	0.00027658	0.000725296	-0.500119	Not-significant
FOS	0.488697	3.76645	0.000277556	0.000727416	-0.503443	Not-significant
RIN1	-0.328404	-3.76478	0.000279185	0.000731246	-0.508971	Not-significant
RPL24	-0.239264	-3.76184	0.000282082	0.000738392	-0.518724	Not-significant
CLPTM1	0.306055	3.75892	0.000284979	0.000745528	-0.528373	Not-significant
PLAAT4	-0.334543	-3.756	0.000287912	0.000752749	-0.538043	Not-significant
PPFIA1	-0.337769	-3.75524	0.000288677	0.000754297	-0.540548	Not-significant
NUCKS1	-0.351692	-3.75434	0.000289598	0.000756249	-0.543555	Not-significant
NEMF	0.214271	3.75362	0.00029033	0.000757707	-0.545938	Not-significant
MOGS	0.292383	3.75337	0.000290582	0.000757912	-0.546759	Not-significant
PIGF	0.191414	3.75161	0.00029238	0.000762144	-0.552581	Not-significant
GTF2F1	-0.21734	-3.74867	0.000295398	0.000769552	-0.562277	Not-significant
OSBPL2	0.379031	3.7385	0.000306097	0.000796949	-0.595865	Not-significant
SULT1A1	-0.368827	-3.7379	0.000306741	0.000798149	-0.597847	Not-significant
HK1	0.447502	3.73665	0.000308081	0.000801159	-0.601963	Not-significant
CLTB	0.245812	3.73511	0.000309736	0.00080498	-0.607017	Not-significant
C1orf159	0.264933	3.73206	0.00031305	0.000813109	-0.61706	Not-significant
THOP1	0.246582	3.73156	0.000313604	0.000813959	-0.618729	Not-significant
MB	0.232103	3.73142	0.00031375	0.000813959	-0.619171	Not-significant
ACOT9	-0.362741	-3.7308	0.000314439	0.000815261	-0.62124	Not-significant
MRPL22	0.142371	3.72759	0.000317975	0.000823937	-0.63179	Not-significant
HAGHL	-0.264201	-3.72432	0.000321619	0.000832886	-0.642541	Not-significant
CNN2	0.615951	3.72267	0.000323477	0.000837201	-0.647977	Not-significant
WBP1	-0.352209	-3.71504	0.000332182	0.000859219	-0.673025	Not-significant
S100A16	-0.394177	-3.71483	0.000332423	0.000859334	-0.673711	Not-significant
XRCC3	0.216011	3.70988	0.000338201	0.000873753	-0.689963	Not-significant
MYO5A	0.329489	3.70921	0.000338988	0.000874983	-0.692156	Not-significant
SMC4	-0.455111	-3.70913	0.000339078	0.000874983	-0.692407	Not-significant
PRPF18	0.235153	3.70891	0.000339333	0.000875042	-0.693114	Not-significant
FARSB	-0.29126	-3.70877	0.000339503	0.000875042	-0.693585	Not-significant
RNF157	0.355018	3.70675	0.000341892	0.000880679	-0.700198	Not-significant
RAP1A	0.186269	3.70449	0.000344585	0.000887092	-0.707597	Not-significant
PSAP	-0.321986	-3.70129	0.000348445	0.0008965	-0.7181	Not-significant
GNG5	-0.173655	-3.69617	0.000354685	0.000912017	-0.734835	Not-significant
ALG8	0.153647	3.69315	0.00035841	0.000921054	-0.744684	Not-significant
ZNF627	0.208872	3.69131	0.00036071	0.000926418	-0.750713	Not-significant
ZKSCAN3	0.221151	3.6911	0.000360966	0.00092653	-0.751382	Not-significant
OSBPL3	0.194894	3.68967	0.000362767	0.000930603	-0.756071	Not-significant
SLC4A7	0.260073	3.68647	0.000366808	0.000940416	-0.766512	Not-significant
POLR3K	-0.18478	-3.6857	0.000367784	0.000942366	-0.769018	Not-significant
ABCC2	0.281669	3.68423	0.000369665	0.00094663	-0.773826	Not-significant
TUBB2A	-0.29919	-3.68307	0.000371146	0.000949863	-0.777592	Not-significant
SNAI1	0.196478	3.68145	0.000373238	0.000954657	-0.782889	Not-significant
ADNP	-0.336989	-3.67767	0.000378146	0.000966644	-0.795198	Not-significant
AJUBA	0.184225	3.67444	0.000382391	0.000976924	-0.805717	Not-significant
KLK7	-0.329515	-3.67288	0.000384451	0.000981091	-0.810777	Not-significant
ARMC8	0.251511	3.67286	0.000384473	0.000981091	-0.81083	Not-significant
EIF2B4	0.26152	3.67242	0.000385057	0.000982008	-0.812261	Not-significant
THEM6	-0.361251	-3.67199	0.000385633	0.000982901	-0.813668	Not-significant
ITFG1	0.252308	3.67167	0.000386057	0.000983407	-0.814704	Not-significant
AKR1A1	0.188289	3.66972	0.000388662	0.000989467	-0.82104	Not-significant
KRTAP2-3	0.84032	3.66843	0.000390397	0.000993304	-0.825235	Not-significant
AURKAIP1	-0.30998	-3.66745	0.000391732	0.000996118	-0.828449	Not-significant
MKRN1	0.240164	3.66553	0.000394332	0.00100215	-0.834681	Not-significant
XPC	-0.26141	-3.66452	0.000395702	0.00100504	-0.837949	Not-significant
RPL7A	-0.211423	-3.66301	0.000397767	0.0010097	-0.84285	Not-significant
MED15	0.28595	3.66087	0.000400713	0.00101659	-0.849799	Not-significant
ARL6IP5	0.187986	3.65934	0.000402835	0.00102137	-0.854772	Not-significant
MAPKAPK5	-0.295774	-3.65253	0.000412391	0.001045	-0.876848	Not-significant
SRP54	0.250084	3.64913	0.000417243	0.00105668	-0.88786	Not-significant
MRPL35	0.344756	3.64777	0.00041919	0.00106099	-0.892243	Not-significant
DENND2D	0.355334	3.64735	0.000419805	0.00106193	-0.893622	Not-significant
HNF1B	0.183941	3.64481	0.00042348	0.00107061	-0.901826	Not-significant
IFI35	-0.271088	-3.64377	0.000424998	0.00107382	-0.905195	Not-significant
RETREG2	0.223883	3.64156	0.000428238	0.00108138	-0.912343	Not-significant
FBXO45	0.246449	3.64008	0.000430413	0.00108625	-0.917111	Not-significant
GPI	-0.314062	-3.63958	0.000431151	0.00108738	-0.918723	Not-significant
NUDCD3	0.224847	3.63944	0.000431361	0.00108738	-0.919181	Not-significant
CDC7	0.288934	3.63297	0.000441038	0.00111113	-0.940059	Not-significant
NDUFB7	0.266906	3.6317	0.000442967	0.00111535	-0.944164	Not-significant
GASK1B	-0.335398	-3.62995	0.000445641	0.00112143	-0.949828	Not-significant
SMG8	0.263368	3.62833	0.000448119	0.00112702	-0.955045	Not-significant
JPT2	-0.22611	-3.62751	0.000449372	0.00112952	-0.957672	Not-significant
COX7B	0.271358	3.62583	0.000451967	0.00113539	-0.963088	Not-significant
RPA3	-0.215963	-3.62512	0.00045307	0.0011375	-0.965382	Not-significant
TCEAL9	0.30312	3.62236	0.000457361	0.00114734	-0.974248	Not-significant
SNRNP27	0.247443	3.62227	0.000457515	0.00114734	-0.974565	Not-significant
ZNRD2	-0.570613	-3.62154	0.00045865	0.00114952	-0.976894	Not-significant
SPDEF	0.438639	3.61781	0.000464539	0.00116361	-0.988893	Not-significant
AKNA	0.213996	3.61601	0.000467408	0.00117013	-0.994685	Not-significant
A2M	-0.332029	-3.60903	0.000478683	0.00119767	-1.0171	Not-significant
ENSA	0.324727	3.60866	0.00047929	0.0011985	-1.01829	Not-significant
SNHG3	0.328163	3.60638	0.000483036	0.00120717	-1.02561	Not-significant
EIF3K	0.227202	3.60499	0.000485337	0.00121223	-1.03008	Not-significant
PRRT1	-0.305959	-3.60448	0.000486185	0.00121365	-1.03172	Not-significant
SETD1B	0.182618	3.60388	0.000487172	0.00121542	-1.03363	Not-significant
SLC25A1	0.337027	3.60115	0.000491723	0.00122607	-1.04237	Not-significant
SYK	0.640032	3.60089	0.000492159	0.00122646	-1.0432	Not-significant
HLA-C	-0.330036	-3.59951	0.000494484	0.00123155	-1.04763	Not-significant
UBE2Z	-0.262146	-3.59645	0.000499667	0.00124375	-1.05743	Not-significant
TCEAL4	0.392046	3.59587	0.000500652	0.00124549	-1.05928	Not-significant
C8orf33	-0.241121	-3.59178	0.000507679	0.00126225	-1.07238	Not-significant
YIPF6	0.286247	3.58731	0.000515451	0.00128084	-1.08666	Not-significant
COMMD7	-0.381495	-3.58457	0.000520272	0.00129209	-1.0954	Not-significant
TOM1L1	0.316569	3.58344	0.000522283	0.00129634	-1.09903	Not-significant
CDC25B	-0.394661	-3.57575	0.000536096	0.00132987	-1.12355	Not-significant
SMC3	-0.387902	-3.57266	0.000541736	0.0013431	-1.13338	Not-significant
ATP1B3	0.547734	3.5725	0.000542043	0.0013431	-1.13391	Not-significant
ZCCHC17	0.16822	3.57043	0.000545861	0.0013514	-1.1405	Not-significant
MPP1	0.321211	3.57018	0.000546318	0.0013514	-1.14129	Not-significant
C3	-0.428964	-3.57018	0.000546323	0.0013514	-1.1413	Not-significant
NDUFA7	0.161286	3.56869	0.000549091	0.00135748	-1.14604	Not-significant
CLK1	-0.420672	-3.56797	0.000550423	0.00136	-1.14832	Not-significant
PSMD11	-0.210509	-3.56652	0.000553129	0.00136549	-1.15292	Not-significant
PYCR2	-0.254661	-3.56645	0.000553273	0.00136549	-1.15317	Not-significant
VCL	-0.471389	-3.56224	0.000561209	0.0013843	-1.16654	Not-significant
PAF1	-0.394073	-3.5607	0.000564134	0.00139072	-1.17142	Not-significant
SIVA1	-0.332738	-3.55958	0.000566281	0.00139523	-1.17498	Not-significant
CLUH	-0.24984	-3.55585	0.000573478	0.00141216	-1.18684	Not-significant
RBM34	-0.413429	-3.55465	0.000575804	0.00141709	-1.19064	Not-significant
SLC35A5	0.208778	3.55277	0.000579463	0.00142529	-1.19658	Not-significant
USP20	0.323102	3.55248	0.000580034	0.00142589	-1.19751	Not-significant
QTRT1	0.159043	3.54983	0.000585246	0.00143734	-1.2059	Not-significant
TMEM131	-0.27956	-3.54978	0.000585351	0.00143734	-1.20607	Not-significant
PPP1R15A	0.346211	3.54546	0.000593942	0.00145762	-1.21975	Not-significant
UGGT1	0.271731	3.54373	0.000597419	0.00146532	-1.22522	Not-significant
EIF2S1	-0.255552	-3.54076	0.000603438	0.00147925	-1.23463	Not-significant
TMEM97	0.249222	3.53881	0.000607423	0.00148758	-1.2408	Not-significant
GTF3A	0.158602	3.53876	0.000607516	0.00148758	-1.24095	Not-significant
PALLD	-0.468056	-3.53548	0.00061427	0.00150327	-1.25132	Not-significant
BET1	0.183593	3.53424	0.000616839	0.00150871	-1.25523	Not-significant
NMD3	0.70665	3.5338	0.000617744	0.00151008	-1.25661	Not-significant
TRAK1	0.231498	3.5329	0.000619626	0.00151383	-1.25946	Not-significant
MAP2K3	-0.268455	-3.53186	0.00062179	0.00151827	-1.26273	Not-significant
ADK	0.255445	3.53023	0.000625229	0.00152581	-1.2679	Not-significant
RNF135	0.199185	3.52395	0.000638571	0.0015575	-1.28771	Not-significant
FAM136A	-0.328376	-3.51894	0.000649393	0.00158301	-1.30346	Not-significant
PKDCC	-0.304014	-3.51867	0.000649989	0.00158358	-1.30432	Not-significant
APC2	-0.49498	-3.51644	0.000654878	0.0015946	-1.31135	Not-significant
WNT10A	-0.326918	-3.51506	0.000657904	0.00160026	-1.31567	Not-significant
FGGY	0.370489	3.51505	0.000657938	0.00160026	-1.31572	Not-significant
ZC3H7B	0.219582	3.51411	0.000660004	0.00160439	-1.31865	Not-significant
NIT2	-0.499129	-3.51288	0.000662732	0.00161012	-1.32252	Not-significant
CKAP4	0.427691	3.51189	0.00066494	0.00161459	-1.32564	Not-significant
MAP2K2	0.379989	3.51144	0.000665945	0.00161613	-1.32705	Not-significant
SNRPD3	-0.366491	-3.50756	0.000674668	0.00163639	-1.33925	Not-significant
DNPEP	-0.298866	-3.50343	0.000684058	0.00165824	-1.3522	Not-significant
C11orf49	0.336304	3.50008	0.000691753	0.00167596	-1.36269	Not-significant
DLD	0.165645	3.49959	0.000692907	0.00167764	-1.36425	Not-significant
BIN3	0.205756	3.49945	0.000693215	0.00167764	-1.36466	Not-significant
TMEM138	-0.301829	-3.49751	0.000697737	0.00168765	-1.37076	Not-significant
MRPS12	0.250878	3.49709	0.000698717	0.00168908	-1.37207	Not-significant
SRP72	0.278962	3.49519	0.000703162	0.00169889	-1.37801	Not-significant
TXNDC9	0.28042	3.49369	0.00070671	0.00170651	-1.38273	Not-significant
PTS	0.16286	3.492	0.000710689	0.00171517	-1.38799	Not-significant
MICAL1	0.236437	3.48603	0.000725008	0.00174876	-1.40667	Not-significant
DNAJA3	-0.291691	-3.48529	0.000726807	0.00175164	-1.40899	Not-significant
NFE2L1	0.16439	3.4852	0.000727006	0.00175164	-1.40925	Not-significant
PDCD6IP	0.153565	3.48342	0.000731332	0.00176109	-1.4148	Not-significant
OGFOD3	-0.247251	-3.48156	0.00073588	0.00177107	-1.42061	Not-significant
DIABLO	-0.281087	-3.48088	0.00073755	0.00177345	-1.42273	Not-significant
RRP7A	-0.266137	-3.48083	0.000737684	0.00177345	-1.4229	Not-significant
PEX2	0.242664	3.47867	0.000743019	0.00178529	-1.42965	Not-significant
RSU1	-0.340043	-3.47772	0.000745367	0.00178995	-1.4326	Not-significant
PHF20L1	0.173868	3.47683	0.000747578	0.00179427	-1.43537	Not-significant
SLC41A3	-0.27008	-3.47407	0.000754481	0.00180984	-1.44398	Not-significant
DKK4	0.27986	3.47253	0.000758353	0.00181813	-1.44877	Not-significant
POLR2I	-0.289449	-3.47138	0.000761268	0.00182411	-1.45236	Not-significant
TSPAN7	0.384602	3.47114	0.000761878	0.00182457	-1.45311	Not-significant
MTMR10	0.170646	3.46835	0.000768984	0.00184058	-1.4618	Not-significant
LSM4	0.202999	3.46797	0.000769952	0.00184189	-1.46298	Not-significant
MAP3K8	-0.315756	-3.4676	0.000770906	0.00184316	-1.46414	Not-significant
DDB1	0.304308	3.46716	0.000772029	0.00184464	-1.4655	Not-significant
UNC13B	-0.421747	-3.46702	0.000772372	0.00184464	-1.46591	Not-significant
MRPL51	-0.224241	-3.46406	0.00078001	0.00186186	-1.47512	Not-significant
TMEM14A	-0.23693	-3.46013	0.000790262	0.0018853	-1.48734	Not-significant
TM9SF1	0.146187	3.45823	0.000795274	0.00189622	-1.49326	Not-significant
PRPF31	-0.296269	-3.45744	0.000797339	0.00190011	-1.49568	Not-significant
ACTN1	-0.225549	-3.457	0.000798503	0.00190184	-1.49705	Not-significant
DENR	0.160132	3.45228	0.000811106	0.0019308	-1.5117	Not-significant
SF1	-0.254908	-3.45183	0.000812325	0.00193265	-1.5131	Not-significant
RUSC1	-0.222466	-3.45085	0.000814967	0.00193788	-1.51614	Not-significant
PSMB1	-0.175444	-3.45044	0.000816068	0.00193944	-1.5174	Not-significant
LITAF	-0.352059	-3.44837	0.000821681	0.00195172	-1.52381	Not-significant
RAB2A	0.165536	3.44767	0.000823586	0.00195412	-1.52598	Not-significant
ETV5	0.180909	3.44758	0.00082385	0.00195412	-1.52628	Not-significant
AP4B1	0.220794	3.44743	0.00082426	0.00195412	-1.52674	Not-significant
HPDL	-0.297684	-3.44734	0.000824487	0.00195412	-1.527	Not-significant
FAM162A	0.293491	3.44373	0.000834413	0.00197658	-1.53819	Not-significant
SUPT16H	0.149504	3.44264	0.000837418	0.00198262	-1.54155	Not-significant
CIC	0.197318	3.44196	0.000839312	0.00198602	-1.54367	Not-significant
SLC43A3	-0.239095	-3.43891	0.000847812	0.00200505	-1.55309	Not-significant
STRBP	-0.232345	-3.43632	0.000855089	0.00202116	-1.56108	Not-significant
RTN4R	0.241578	3.43541	0.00085768	0.00202619	-1.56391	Not-significant
CDKN2C	0.162081	3.43496	0.000858962	0.00202812	-1.5653	Not-significant
ASCC3	-0.389196	-3.43472	0.000859646	0.00202863	-1.56605	Not-significant
TEX261	0.180704	3.43413	0.000861301	0.00203144	-1.56785	Not-significant
RAP1GDS1	-0.303548	-3.43214	0.000866982	0.00204373	-1.57399	Not-significant
RIDA	0.172449	3.4298	0.000873706	0.00205847	-1.58121	Not-significant
SLC2A10	0.36454	3.42895	0.000876177	0.00206318	-1.58385	Not-significant
CCT8	-0.29567	-3.42789	0.000879227	0.00206924	-1.5871	Not-significant
PSMD8	-0.214023	-3.42731	0.000880917	0.0020721	-1.58889	Not-significant
NUB1	0.18745	3.42606	0.000884545	0.00207952	-1.59274	Not-significant
COL6A1	-0.275786	-3.42546	0.000886321	0.00208257	-1.59461	Not-significant
LARS1	-0.31849	-3.42309	0.000893271	0.00209777	-1.60191	Not-significant
ATXN1L	0.265189	3.4226	0.000894716	0.00210003	-1.60342	Not-significant
LMBRD1	0.35247	3.42082	0.000899966	0.00211122	-1.60889	Not-significant
SMG6	-0.221014	-3.42001	0.00090237	0.00211572	-1.61138	Not-significant
NBL1	-0.422963	-3.41919	0.000904811	0.0021203	-1.6139	Not-significant
PCED1B	0.229069	3.41636	0.000913289	0.00213902	-1.62262	Not-significant
SYNCRIP	-0.394298	-3.41578	0.000915024	0.00214193	-1.62439	Not-significant
CMAS	-0.2873	-3.40967	0.000933598	0.00218424	-1.64316	Not-significant
SHKBP1	-0.25535	-3.40888	0.00093602	0.00218873	-1.64558	Not-significant
PDHB	0.258298	3.40523	0.000947306	0.00221393	-1.65677	Not-significant
WRAP73	-0.273764	-3.40308	0.000954041	0.00222848	-1.66339	Not-significant
SLC43A1	0.179838	3.40231	0.000956444	0.0022329	-1.66574	Not-significant
TMCO3	0.292359	3.40204	0.000957302	0.00223371	-1.66658	Not-significant
BNIP2	-0.347294	-3.40018	0.000963167	0.00224619	-1.67228	Not-significant
ELOB	-0.19255	-3.39581	0.000977048	0.00227734	-1.68564	Not-significant
C8G	0.321627	3.39487	0.000980081	0.00228319	-1.68853	Not-significant
APPBP2	0.352318	3.39462	0.000980887	0.00228385	-1.6893	Not-significant
STRAP	-0.210171	-3.39179	0.000990012	0.00230386	-1.69794	Not-significant
DNM1	-0.206339	-3.38983	0.000996379	0.00231657	-1.70393	Not-significant
ZNF410	-0.611993	-3.38964	0.000997008	0.00231657	-1.70451	Not-significant
TRAM1	0.205034	3.38947	0.000997576	0.00231657	-1.70505	Not-significant
MAPKAPK5-AS1	0.385015	3.38946	0.000997597	0.00231657	-1.70507	Not-significant
ATXN10	-0.227295	-3.38735	0.00100451	0.00233139	-1.71151	Not-significant
PLXNB1	0.206581	3.38353	0.00101714	0.00235944	-1.72317	Not-significant
BTBD1	-0.196461	-3.38296	0.00101904	0.00236258	-1.72491	Not-significant
SLBP	-0.235303	-3.38167	0.00102335	0.00237132	-1.72885	Not-significant
GLB1	-0.270653	-3.37989	0.00102932	0.0023839	-1.73428	Not-significant
ZNF207	-0.180504	-3.37934	0.00103117	0.00238691	-1.73595	Not-significant
GPATCH8	0.286602	3.37864	0.00103353	0.0023911	-1.73809	Not-significant
ARFRP1	-0.178042	-3.37794	0.00103588	0.00239526	-1.7402	Not-significant
NDUFB8	0.169497	3.3744	0.00104792	0.00242182	-1.75098	Not-significant
RIC8A	-0.249754	-3.37336	0.0010515	0.0024288	-1.75416	Not-significant
ITM2B	0.219554	3.37304	0.00105258	0.00243002	-1.75512	Not-significant
MED12	0.17676	3.37279	0.00105344	0.00243072	-1.75589	Not-significant
TWF1	-0.318207	-3.37225	0.00105531	0.00243375	-1.75754	Not-significant
HLA-DRB4	-0.28711	-3.36964	0.00106432	0.00245323	-1.76547	Not-significant
LTBR	-0.183943	-3.36789	0.00107041	0.00246597	-1.77079	Not-significant
EPRS1	-0.284362	-3.36687	0.001074	0.00247292	-1.77391	Not-significant
CNIH4	-0.276326	-3.36531	0.00107945	0.00248417	-1.77864	Not-significant
MIA2	0.169345	3.36194	0.00109139	0.00251032	-1.78889	Not-significant
ATP1B1	0.419422	3.35899	0.00110191	0.00253318	-1.79783	Not-significant
MAST1	-0.176467	-3.3565	0.00111088	0.00255244	-1.80539	Not-significant
PSME3IP1	0.233958	3.35463	0.00111765	0.00256666	-1.81106	Not-significant
MRPS33	-0.313211	-3.35389	0.00112034	0.00257147	-1.81329	Not-significant
NUTF2	-0.187646	-3.3533	0.0011225	0.00257508	-1.81509	Not-significant
NT5E	-0.423633	-3.35117	0.00113029	0.00259159	-1.82154	Not-significant
STK26	0.166643	3.34968	0.00113577	0.00260279	-1.82605	Not-significant
GJA1	-0.25939	-3.34922	0.00113747	0.00260532	-1.82744	Not-significant
CABIN1	-0.236262	-3.34884	0.00113887	0.00260715	-1.82858	Not-significant
WDR44	0.249918	3.33997	0.00117212	0.00268185	-1.8554	Not-significant
MRPL42	-0.244246	-3.33731	0.00118226	0.00270363	-1.86342	Not-significant
ZNF212	0.232446	3.33254	0.00120067	0.0027443	-1.87781	Not-significant
ATP5PD	0.206049	3.33214	0.00120225	0.00274647	-1.87904	Not-significant
LCN2	-0.674781	-3.33101	0.00120665	0.00275508	-1.88244	Not-significant
DDX52	-0.228012	-3.33021	0.00120978	0.00276078	-1.88485	Not-significant
TTC37	0.44557	3.3298	0.00121136	0.00276295	-1.88607	Not-significant
CDAN1	0.2577	3.32888	0.00121497	0.00276972	-1.88884	Not-significant
EDF1	0.165745	3.32683	0.00122306	0.00278672	-1.89502	Not-significant
NDUFA10	0.447296	3.3264	0.00122478	0.00278917	-1.89633	Not-significant
S100A2	-0.234337	-3.32531	0.00122908	0.0027975	-1.89959	Not-significant
NCOR1	0.266074	3.32503	0.00123019	0.00279856	-1.90043	Not-significant
CSNK1D	-0.186918	-3.32047	0.00124847	0.00283868	-1.91417	Not-significant
CMPK1	-0.319063	-3.31994	0.00125059	0.002842	-1.91574	Not-significant
NXF3	0.252639	3.31908	0.00125406	0.00284837	-1.91833	Not-significant
TP53	-0.285832	-3.31893	0.00125469	0.00284837	-1.91879	Not-significant
ELP4	0.244756	3.31504	0.00127053	0.00288282	-1.93047	Not-significant
PPP1CB	-0.315691	-3.30861	0.00129711	0.00294161	-1.94974	Not-significant
NCBP2	-0.335498	-3.30512	0.00131177	0.00297331	-1.9602	Not-significant
PDGFA	-0.208877	-3.30247	0.00132301	0.00299722	-1.96813	Not-significant
PTOV1	0.214133	3.30176	0.00132602	0.00300249	-1.97025	Not-significant
ORMDL3	-0.351644	-3.30116	0.00132859	0.00300674	-1.97205	Not-significant
TRIM33	0.228233	3.29758	0.00134398	0.00303999	-1.98276	Not-significant
NDUFA2	0.232007	3.29641	0.00134906	0.0030499	-1.98627	Not-significant
INO80	0.135736	3.29489	0.00135563	0.00306289	-1.99079	Not-significant
GFPT1	0.189922	3.29476	0.00135621	0.00306289	-1.99119	Not-significant
WASL	0.269749	3.29448	0.00135743	0.00306405	-1.99202	Not-significant
ZNF496	0.229577	3.29321	0.00136298	0.00307498	-1.99581	Not-significant
HAX1	0.187631	3.2881	0.00138554	0.00312426	-2.01108	Not-significant
NUDC	0.234395	3.2847	0.00140071	0.00315685	-2.0212	Not-significant
CPSF7	0.198799	3.28399	0.00140391	0.00316242	-2.02332	Not-significant
RPE	0.204708	3.28261	0.00141012	0.00317476	-2.02742	Not-significant
SLC28A3	0.220987	3.28223	0.00141183	0.00317699	-2.02856	Not-significant
SPCS2	0.244341	3.27184	0.00145957	0.00328207	-2.05946	Not-significant
ATP6V0A4	0.23134	3.27174	0.00146004	0.00328207	-2.05975	Not-significant
RAB18	-0.265616	-3.27005	0.00146796	0.00329818	-2.06478	Not-significant
POMT1	0.214224	3.26914	0.00147221	0.00330497	-2.06747	Not-significant
LINC00525	0.21839	3.26908	0.0014725	0.00330497	-2.06765	Not-significant
ARMC7	0.224078	3.26526	0.00149058	0.00334385	-2.07899	Not-significant
PUS3	0.266314	3.2644	0.0014947	0.00335135	-2.08155	Not-significant
UGDH	0.236204	3.26357	0.00149863	0.00335844	-2.08399	Not-significant
LRRC45	0.199094	3.25869	0.00152214	0.00340938	-2.09845	Not-significant
LIPA	-0.343096	-3.25502	0.00154007	0.00344777	-2.10932	Not-significant
NFKB2	-0.423385	-3.25455	0.00154236	0.00345113	-2.1107	Not-significant
APP	-0.192786	-3.25156	0.00155711	0.00348234	-2.11954	Not-significant
MDM1	-0.268379	-3.2508	0.00156087	0.00348896	-2.12178	Not-significant
ENOPH1	-0.216898	-3.24846	0.00157253	0.00351323	-2.12869	Not-significant
YPEL5	0.383637	3.24717	0.00157901	0.00352589	-2.1325	Not-significant
D2HGDH	0.176385	3.24462	0.00159185	0.00355275	-2.14002	Not-significant
CASD1	0.205554	3.24391	0.00159547	0.00355899	-2.14213	Not-significant
RHOBTB2	0.252707	3.2431	0.0015996	0.00356639	-2.14453	Not-significant
ERCC2	0.209164	3.23921	0.00161949	0.00360888	-2.156	Not-significant
XPO6	-0.161119	-3.23865	0.00162237	0.00361346	-2.15765	Not-significant
PSMD10	0.221842	3.23525	0.00163997	0.0036508	-2.16766	Not-significant
BYSL	-0.411077	-3.23389	0.00164705	0.00366468	-2.17165	Not-significant
RPLP2	-0.221965	-3.23266	0.00165349	0.00367713	-2.17527	Not-significant
RTRAF	-0.186548	-3.22993	0.00166787	0.00370722	-2.1833	Not-significant
LMO7	0.246898	3.22709	0.00168293	0.0037388	-2.19165	Not-significant
C6orf89	0.294965	3.22678	0.00168459	0.00374058	-2.19256	Not-significant
THAP9-AS1	0.186128	3.22554	0.00169121	0.00375337	-2.1962	Not-significant
FAM193B	0.160288	3.22454	0.00169658	0.00376338	-2.19914	Not-significant
TMX3	0.174647	3.21936	0.00172461	0.0038236	-2.21433	Not-significant
MGST2	0.224275	3.21799	0.00173206	0.00383817	-2.21833	Not-significant
ESAM	0.152322	3.21669	0.00173922	0.00385208	-2.22215	Not-significant
OCIAD1	0.140598	3.21376	0.00175536	0.00388475	-2.23072	Not-significant
IGHM	0.228235	3.21369	0.00175575	0.00388475	-2.23092	Not-significant
LRRFIP2	0.190441	3.21349	0.00175689	0.00388528	-2.23152	Not-significant
CDK5RAP1	0.175423	3.21134	0.00176887	0.00390981	-2.23782	Not-significant
TCF7	0.359357	3.20916	0.00178106	0.00393475	-2.24419	Not-significant
GHITM	0.251455	3.20757	0.00179002	0.00395254	-2.24884	Not-significant
USP25	-0.16227	-3.20575	0.00180034	0.00397332	-2.25416	Not-significant
TRAPPC6A	0.356481	3.20424	0.0018089	0.0039902	-2.25856	Not-significant
EPS8L3	-0.384285	-3.20041	0.00183087	0.00403661	-2.26974	Not-significant
UTRN	0.179184	3.20009	0.00183274	0.00403869	-2.27069	Not-significant
YAE1	-0.254109	-3.19956	0.00183575	0.00404234	-2.27221	Not-significant
GALNT2	-0.577847	-3.19948	0.00183625	0.00404234	-2.27246	Not-significant
TMEM37	0.543626	3.19777	0.00184617	0.00406214	-2.27746	Not-significant
PRKAG2	0.203819	3.19685	0.00185149	0.00407178	-2.28012	Not-significant
TTC9	0.342894	3.19633	0.00185452	0.00407639	-2.28163	Not-significant
ESYT2	0.28579	3.19116	0.00188492	0.00414113	-2.29669	Not-significant
ETNK1	0.43748	3.19018	0.00189073	0.00415181	-2.29954	Not-significant
MRPL27	0.198619	3.18598	0.00191582	0.00420292	-2.31175	Not-significant
E2F4	-0.250708	-3.18597	0.00191594	0.00420292	-2.31181	Not-significant
RAB4A	-0.286685	-3.18553	0.00191853	0.0042065	-2.31306	Not-significant
PKN3	0.151584	3.18489	0.00192244	0.00421296	-2.31494	Not-significant
SLC39A9	0.232579	3.18407	0.00192737	0.00422162	-2.31731	Not-significant
GLG1	-0.240678	-3.18289	0.00193454	0.00423522	-2.32075	Not-significant
CCDC9	-0.236525	-3.18119	0.00194487	0.00425568	-2.32568	Not-significant
OTUB1	0.316524	3.18006	0.00195175	0.00426861	-2.32895	Not-significant
ARPC5L	-0.195644	-3.17504	0.0019827	0.00433411	-2.34351	Not-significant
USP34	0.181727	3.17439	0.00198674	0.00434077	-2.3454	Not-significant
ASXL1	0.180856	3.1728	0.00199664	0.00436021	-2.34999	Not-significant
CLTA	-0.22722	-3.17135	0.00200578	0.00437798	-2.35422	Not-significant
[truncated: 2,364 more rows]
